# Supplementary material for: Asymmetric synthesis of tricyclic 6,5,5-fused polycycles by the desymmetric Pauson–Khand reaction
Source: Royal Society of Chemistry journal article supplement (doi:10.1039/d1qo01878g), 2022-01-01
Supplement: d1qo01878g1.pdf [file d1qo01878g1.pdf]

## Supporting Information

### Asymmetric synthesis of tricyclic 6,5,5-fused polycycles by desymmetric Pauson-Khand reaction

*Qi Teng<sup>#</sup>, Dong Chen<sup>#</sup>, Chen-Ho Tong and Zhenghu Xu<sup>\*</sup>*  
[xuzh@sdu.edu.cn](mailto:xuzh@sdu.edu.cn)

#### CONTENT:

|                                                          |     |
|----------------------------------------------------------|-----|
| 1. General Information.....                              | S2  |
| 2. Preparation of Starting Materials.....                | S2  |
| 3. Standard Procedure for the Pauson-Khand Reaction..... | S5  |
| 4. Scale-up Experiment.....                              | S7  |
| 5. Investigation of the Additives.....                   | S7  |
| 6. X-ray Crystallography.....                            | S7  |
| 7. Characterization of Compound 2.....                   | S8  |
| 8. NMR and HRMS Spectra of All Compounds.....            | S33 |
| 9. References.....                                       | S68 |

## 1. General Information

Unless otherwise noted, analytic grade solvents were used for the chromatography, and all the reagents were obtained commercially and used without further purification. All reactions were performed under nitrogen atmosphere and in a flame-dried or oven-dried glassware with magnetic stirring. Reactions were monitored by TLC. Solvents were dried with CaH<sub>2</sub>. All NMR spectra were recorded on Bruker-500 MHz spectrometer. The chemical shifts ( $\delta$ ) and coupling constants ( $J$ ) were expressed in ppm and Hz respectively. All <sup>1</sup>H NMR experiments are reported in  $\delta$  units, parts per million (ppm), and were measured relative to the signals for TMS. All <sup>13</sup>C NMR spectra are reported in ppm relative to deuteriochloroform (77.16 ppm) and were obtained with <sup>1</sup>H decoupling. HRMS were measured on the Q-TOF6510 instruments.

## 2. Preparation of Starting Materials

### (1) General procedure for the synthesis of *O*-Tethered Alkynes

**1a-1p** were prepared according to the previously reported procedure.<sup>[1],[2]</sup>

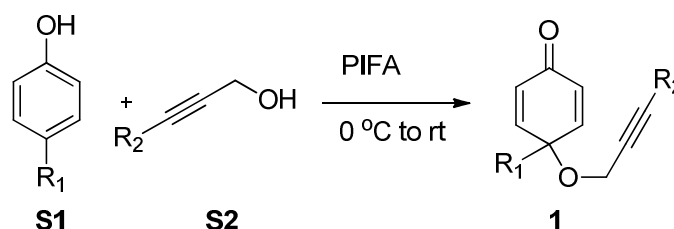

The meso-1,6-dienyne substrates **1** were prepared from commercially available 4-substituted phenols **S1** and 3-substituted propargyl alcohol **S2** using standard procedures<sup>[1]</sup> as following:

To a stirred solution of 4-substitute phenol **S1** (1.0 mmol) in 1 mL of 3-substitute propargyl alcohol **S2** was added [bis(trifluoroacetoxy)iodo]benzene (PIFA, 516 mg, 1.2 mmol, 1.2 equiv.) in several portions at 0 °C. The resulting reaction mixture was stirred at room temperature for overnight. Then the reaction mixture was diluted with water (10 mL) and extracted with ethyl acetate (15 mL  $\times$  3). The combined organic solvent was washed with brine (15 mL), dried over anhydrous sodium sulfate. The solvent was removed under reduced pressure and the residue was

purified by a silica gel column chromatography (petroleum ether) to give the desired products **1a-1h**, **1j**, **1k** and **1m**.

General procedure for the synthesis of **1i**, **1l** and **1n-1p**:

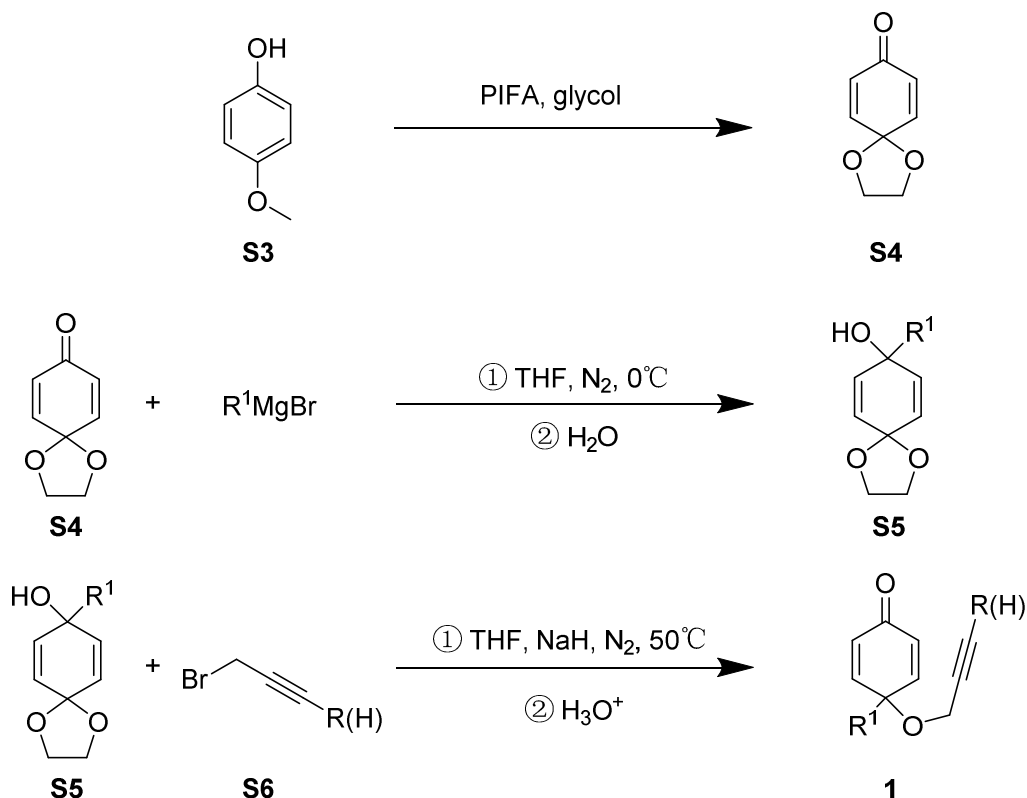

To a stirred suspension of PIFA (4.50 g, 10.5 mmol) in ethylene glycol (40 mL) was added a solution of 4-methoxyphenol (1.00 g, 8.06 mmol) in  $CH_2Cl_2$  (5 mL) and ethylene glycol (5 mL) at room temperature. After 20 minutes, the reaction mixture was quenched with  $NaHCO_3$  (saturated aqueous solution, 50 mL). After 10 minutes, the resultant solution was extracted with  $CH_2Cl_2$  ( $3 \times 100$  mL). Then the combined organic layers were dried over anhydrous sodium sulfate and concentrated in vacuo. The crude material was purified by column chromatography (silica gel, petroleum ether/ ethyl acetate: 4/1) to afford product 1,4-dioxaspiro[4.5]deca-6,9-dien-8-one (**S4**).

To a well-stirred solution of **S4** (1.0 mmol) in 1 mL of tetrahydrofuran was dropwise added Grignard reagent (1 mol/L in tetrahydrofuran, 1.2 equiv) at  $0^\circ C$  under nitrogen atmosphere. After 20 minutes, the resulting mixture was quenched with water (50 mL) and extracted with dichloromethane ( $3 \times 50$  mL). The combined

organic layers were then dried over anhydrous sodium sulfate and concentrated in vacuo to afford crude product **S5**. The crude product **S5** could be used for the next step with no further purification.

To a solution of crude product **S5** in 10 mL tetrahydrofuran was added NaH (60% in mineral oil, 5.0 mmol, 5.0 equiv.) in several portions at 0 °C under nitrogen atmosphere, followed by the addition of  $\beta$ -brominated alkynes (**S6**, 3.0 mmol, 3.0 equiv.). Then the mixture was heated at 50 °C overnight. The resulting solution was quenched with 10 mL of water at 0 °C and acidified with hydrochloric acid (6 mol/L, 0.9 mL). The resulting mixture was stirred at room temperature to hydrolyze the ketal. After two hours, the mixture was extracted with dichloromethane (50 mL  $\times$  3). The combined organic layers were dried over anhydrous sodium sulfate and concentrated in vacuo. The crude material was then purified by a silica gel column chromatography to give the desired products **1i**, **1l** and **S7**, precursor of **1n-1p**.

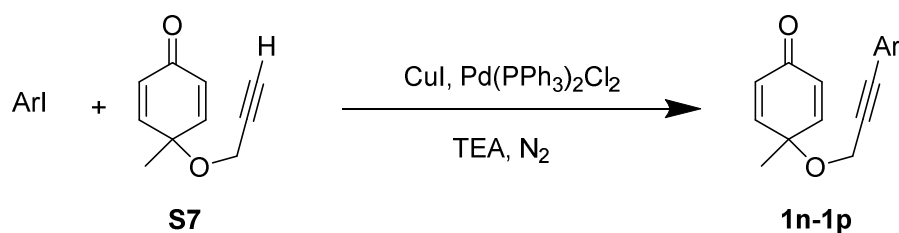

To a solution of *O*-tethered alkyne **1l** (10.0 mmol, 1.0 equiv.) in degassed triethylamine (TEA, 1 mol/L, 10mL) was added Pd(PPh<sub>3</sub>)<sub>2</sub>Cl<sub>2</sub> (3 mol%), CuI (1.5 mol%) and substituted iodobenzene (15 mmol, 1.5 equiv.) under nitrogen atmosphere. The mixture was stirred at 65 °C. After five hours, the reaction was cooled to room temperature. The solution was washed with saturated ammonium chloride solution and extracted with dichloromethane. The combined organic layers were dried over anhydrous sodium sulfate and concentrated in vacuo. The crude material was purified by column chromatography (silica gel, petroleum ether/ ethyl acetate: 12/1 to 8/1) to give the desired products **1p-1t**.

## (2) General procedure for the synthesis of *N*-Tethered Alkynes<sup>[3]</sup>

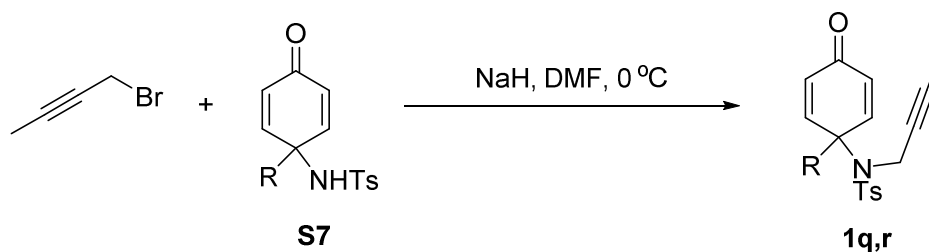

To a well-stirred solution of substrate **S3** (1 equiv.) in dimethyl formamide (DMF, 0.5 mol/L) was added NaH (2.0 equiv.) in several portion at 0 °C under nitrogen atmosphere. The resulting reaction mixture was added 1-bromo-2-butyne (1.5 equiv.) at 0 °C and stirred for 30 min. The reaction mixture was quenched by saturated aqueous NH<sub>4</sub>Cl and extracted with 1:1 ratio of hexanes/EtOAc (3 times). The combined organic solvent was dried over anhydrous Na<sub>2</sub>SO<sub>4</sub>, filtered and evaporated under reduced pressure. The residue was purified by flash column chromatography (EtOAc/Hexane) to afford **1q** and **1r**.

### 3. Standard Procedure for the Pauson-Khand Reaction

#### General Procedure for Rhodium-Catalyzed Asymmetric Synthesis of Fused tricyclic Scaffold

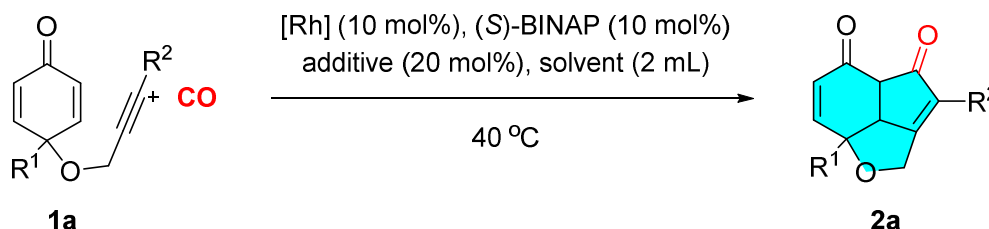

To a mixture of reactant **1** (0.1 mmol), [Rh(CO)<sub>2</sub>Cl]<sub>2</sub> (0.005 mmol, 5.0 mol%), (S)-BINAP (0.010 mmol, 10 mol%), AgNTf<sub>2</sub> (0.010 mmol, 10 mol%), CH<sub>3</sub>OLi (0.020 mmol, 20 mol%), DCM (2 mL) was added under atmosphere of carbon monoxide (0.1 atm) and nitrogen (0.9 atm). Then the reaction mixture was stirred at 40 °C overnight under atmosphere above. The solvent was evaporated under reduce pressure when the reaction completed. The mixture was further purified by column chromatography (silica gel, petroleum ether/ ethyl acetate: 4/1 to 1.5/1) to afford the desired product **2**.

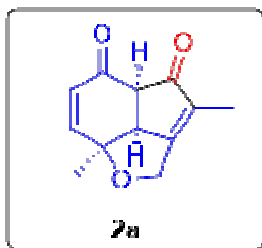

White solid. 91% yield.  $^1\text{H}$  NMR (500 MHz,  $\text{CDCl}_3$ )  $\delta$  6.58 (dd,  $J = 10.3, 1.6$  Hz, 1H), 5.77 (d,  $J = 10.3$  Hz, 1H), 4.82 (d,  $J = 15.7$  Hz, 1H), 4.63 (d,  $J = 15.7$  Hz, 1H), 3.69 (d,  $J = 5.8$  Hz, 1H), 3.41 (dd,  $J = 3.4, 1.7$  Hz, 1H), 1.76 (s, 3H), 1.61 (s, 3H).  $^{13}\text{C}$  NMR (126 MHz,  $\text{CDCl}_3$ )  $\delta$  199.9, 187.4, 176.0, 151.4, 132.7, 126.5, 76.6, 65.7, 58.7, 50.1, 26.6, 9.3. HRMS (ESI,  $m/z$ ) calcd for  $\text{C}_{12}\text{H}_{12}\text{O}_3$   $[\text{M}+\text{H}]^+$  205.0859, found 205.0859. >99% ee; Chiral HPLC analysis of the product: Daicel Chiralpak OD-H 250X4.6 mm 5u column; hexane/2-propanol = 80/20, detected at 254 nm, flow rate 1 mL/min, Retention times: 14.3 min (minor), 15.6 min (major).

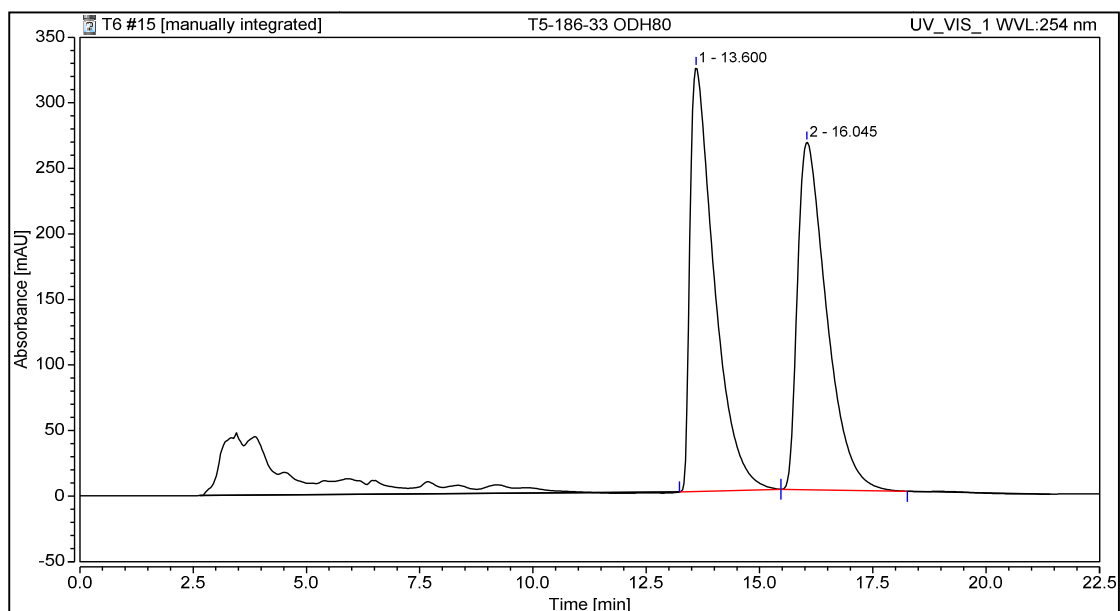

| Integration Results |                       |                 |                |                    |                      |
|---------------------|-----------------------|-----------------|----------------|--------------------|----------------------|
| No.                 | Retention Time<br>min | Area<br>mAU*min | Height<br>mAU  | Relative Area<br>% | Relative Height<br>% |
| 1                   | 13.600                | 200.964         | 323.450        | 50.36              | 54.94                |
| 2                   | 16.045                | 198.119         | 265.264        | 49.64              | 45.06                |
| <b>Total:</b>       |                       | <b>399.083</b>  | <b>588.715</b> | <b>100.00</b>      | <b>100.00</b>        |

| Integration Results |                       |                 |               |                    |                      |
|---------------------|-----------------------|-----------------|---------------|--------------------|----------------------|
| No.                 | Retention Time<br>min | Area<br>mAU*min | Height<br>mAU | Relative Area<br>% | Relative Height<br>% |
| 1                   | 14.278                | 0.854           | 1.566         | 0.35               | 0.40                 |
| 2                   | 15.577                | 241.118         | 387.456       | 99.65              | 99.60                |

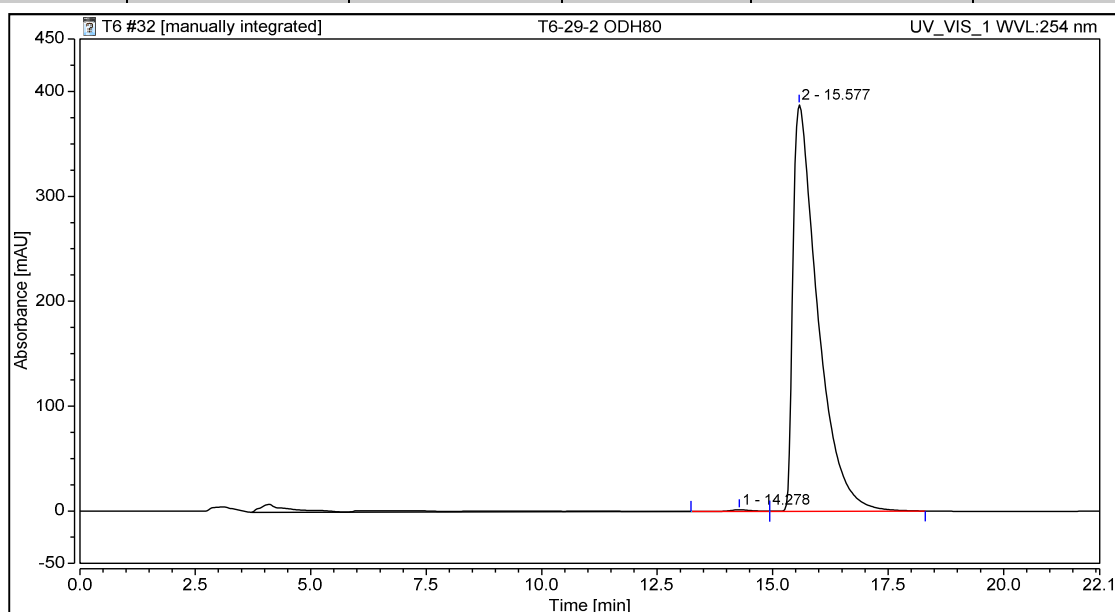

#### 4. Scale-up Experiment

To a mixture of reactant **1a** (1.8 mmol),  $[\text{Rh}(\text{CO})_2\text{Cl}]_2$  (0.050 mmol, 2.8 mol%), (S)-BINAP (0.100 mmol, 5.6 mol%),  $\text{AgNTf}_2$  (0.100 mmol, 5.6 mol%),  $\text{CH}_3\text{OLi}$  (0.200 mmol, 11 mol%), DCM (30 mL) was added under atmosphere of carbon monoxide (0.1 atm) and nitrogen (0.9 atm). Then the reaction mixture was stirred at

40 °C for 40 hours under atmosphere above. The solvent was evaporated under reduce pressure when the reaction completed. The mixture was further purified by column chromatography (silica gel, petroleum ether/ ethyl acetate: 2/1) to afford product **2a**.

## 5. Investigation of the Additives

The investigation was carried out with standard reaction under optimized conditions but changing MeOLi to other additives. The results were shown as follow.

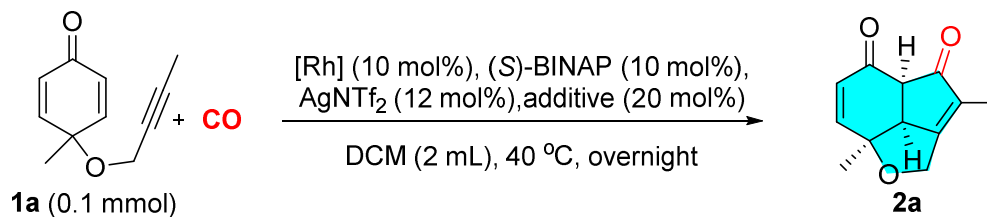

| Entry | additive           | T/°C | Yield/% |
|-------|--------------------|------|---------|
| 1     | MeONa              | 40   | 55      |
| 2     | DBU                | 40   | 0       |
| 3     | LiNTf <sub>2</sub> | 40   | 77      |
| 4     | MeOLi              | 40   | 91      |

## 6. X-ray Crystallography

The crystal of **2a** suitable for XRD analysis was prepared by recrystallization from a mixed solvent of dichloromethane and petroleum ether. CCDC 2049470 (**2a**) contains the supplementary crystallographic data for this paper. The crystallographic data can be obtained free from The Cambridge Crystallographic Data Center via [www.ccdc.cam.ac.uk/data\\_request/ci](http://www.ccdc.cam.ac.uk/data_request/ci).

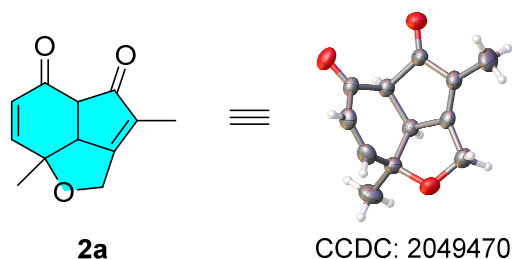

## 7. Characterization of Compound 2



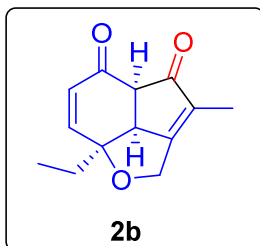

Yellow solid. 70% yield.  $^1\text{H}$  NMR (500 MHz,  $\text{CDCl}_3$ )  $\delta$  6.43 (dd,  $J = 10.4, 1.6$  Hz, 1H), 5.79 (d,  $J = 10.4$  Hz, 1H), 4.73 (d,  $J = 15.6$  Hz, 1H), 4.59 (d,  $J = 15.6$  Hz, 1H), 3.58 (d,  $J = 5.8$  Hz, 1H), 3.41 – 3.25 (m, 1H), 1.85 (qd,  $J = 7.5, 2.7$  Hz, 2H), 1.69 (s, 3H), 0.89 (t,  $J = 7.6$  Hz, 3H).  $^{13}\text{C}$  NMR (126 MHz,  $\text{CDCl}_3$ )  $\delta$  200.0, 187.6, 175.9, 150.1, 132.4, 127.7, 79.9, 65.6, 59.2, 48.3, 32.4, 9.3, 8.3. HRMS (ESI,  $m/z$ ) calcd for  $\text{C}_{13}\text{H}_{14}\text{O}_3$   $[\text{M}+\text{H}]^+$  219.1016, found 219.1024.  $[\alpha]_D^{23} = -116.6^\circ$  (c 0.26,  $\text{CHCl}_3$ ); 98% ee; Chiral HPLC analysis of the product: Daicel Chiralpak OD-H 250X4.6 mm 5u column; hexane/2-propanol = 80/20, detected at 254 nm, flow rate 1 mL/min, Retention times: 12.2 min (minor), 13.6 min (major).

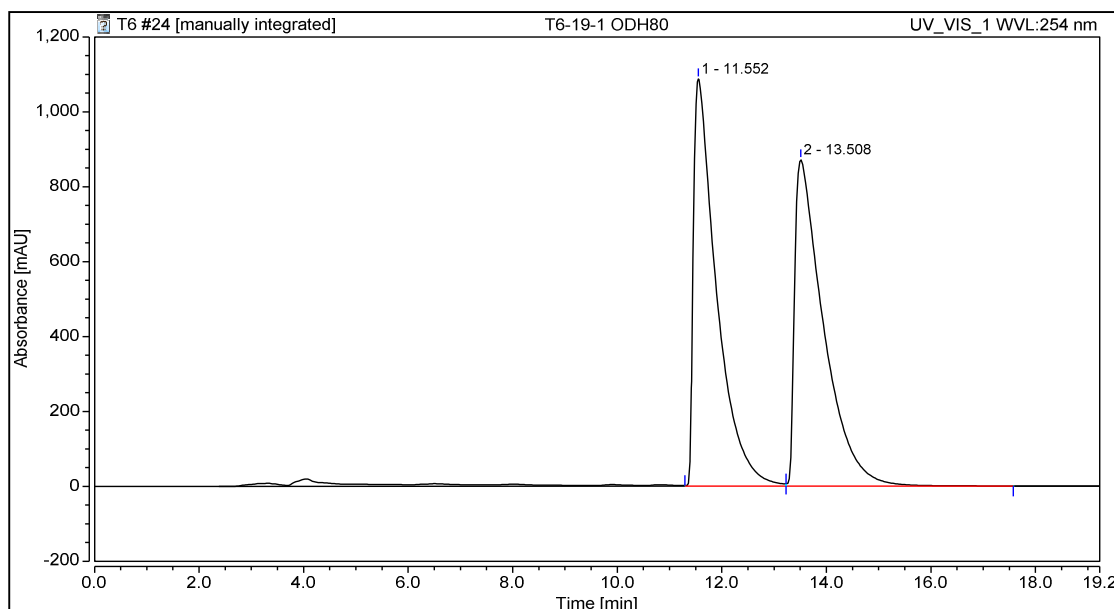

| Integration Results |                       |                 |                 |                    |                      |
|---------------------|-----------------------|-----------------|-----------------|--------------------|----------------------|
| No.                 | Retention Time<br>min | Area<br>mAU*min | Height<br>mAU   | Relative Area<br>% | Relative Height<br>% |
| 1                   | 11.552                | 555.945         | 1087.559        | 49.90              | 55.50                |
| 2                   | 13.508                | 558.261         | 871.836         | 50.10              | 44.50                |
| <b>Total:</b>       |                       | <b>1114.206</b> | <b>1959.395</b> | <b>100.00</b>      | <b>100.00</b>        |

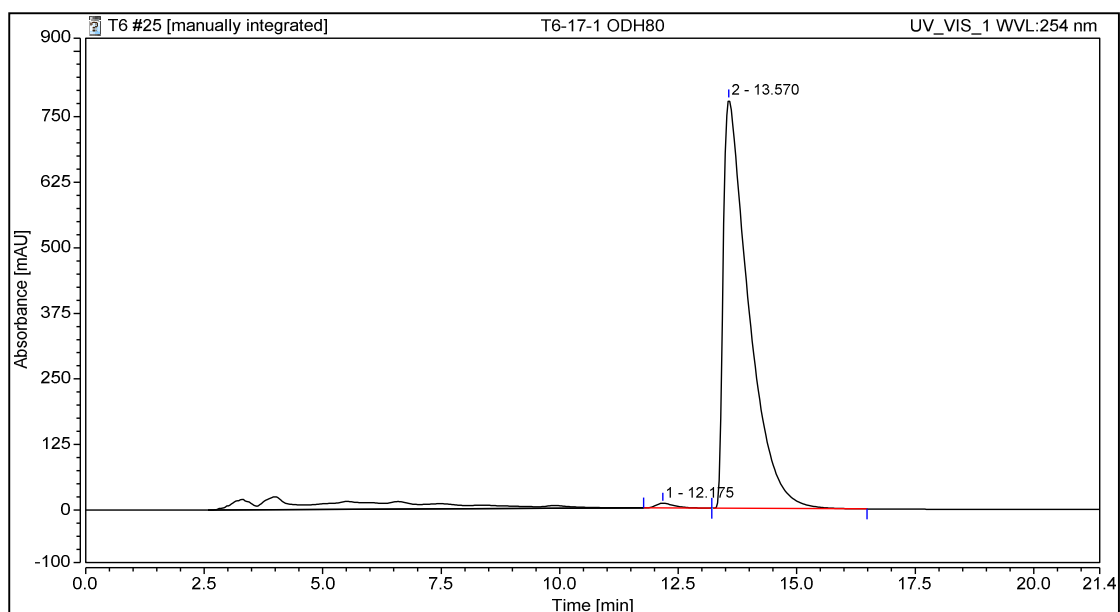

| Integration Results |                       |                 |                |                    |                      |
|---------------------|-----------------------|-----------------|----------------|--------------------|----------------------|
| No.                 | Retention Time<br>min | Area<br>mAU*min | Height<br>mAU  | Relative Area<br>% | Relative Height<br>% |
| 1                   | 12.175                | 4.012           | 8.997          | 0.82               | 1.14                 |
| 2                   | 13.570                | 484.075         | 778.818        | 99.18              | 98.86                |
| <b>Total:</b>       |                       | <b>488.086</b>  | <b>787.815</b> | <b>100.00</b>      | <b>100.00</b>        |

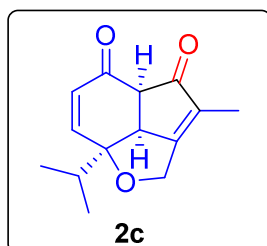

Yellow solid. 68% yield.  $^1\text{H}$  NMR (500 MHz,  $\text{CDCl}_3$ )  $\delta$  6.49 (dd,  $J = 10.5, 1.4$  Hz, 1H), 5.91 (d,  $J = 10.5$  Hz, 1H), 4.77 (d,  $J = 15.5$  Hz, 1H), 4.67 (d,  $J = 15.5$  Hz, 1H), 3.62 (d,  $J = 5.8$  Hz, 1H), 3.37 (d,  $J = 1.6$  Hz, 1H), 2.21 – 2.05 (m, 1H), 1.75 (s, 3H), 1.02 (d,  $J = 6.9$  Hz, 3H), 0.96 (d,  $J = 6.9$  Hz, 3H).  $^{13}\text{C}$  NMR (126 MHz,  $\text{CDCl}_3$ )  $\delta$  200.1, 187.6, 175.9, 148.4, 132.4, 128.5, 82.2, 65.6, 59.8, 47.5, 37.3, 17.5, 17.0, 9.3. HRMS (ESI,  $m/z$ ) calcd for  $\text{C}_{14}\text{H}_{16}\text{O}_3$   $[\text{M}+\text{H}]^+$  233.1172, found 233.1175.  $[\alpha]_{\text{D}}^{23} = -97.0^\circ$  (c 0.13,  $\text{CHCl}_3$ ); 98% ee; Chiral HPLC analysis of the product: Daicel Chiralpak OD-H 250X4.6 mm 5u column; hexane/2-propanol = 80/20, detected at 254 nm, flow rate 1 mL/min, Retention times: 10.6 min (minor), 12.2 min (major).

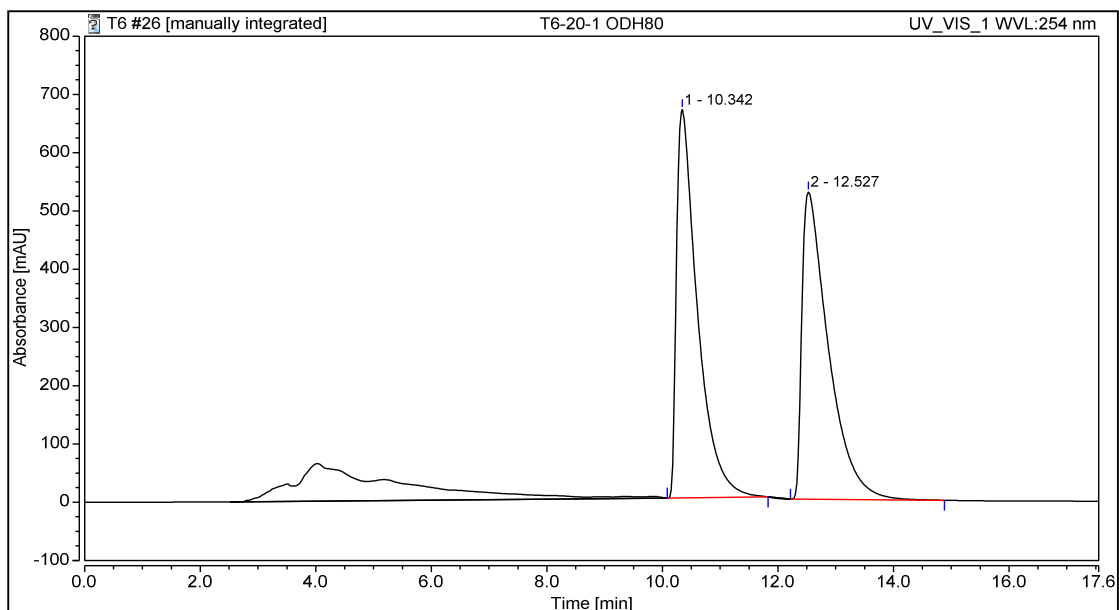

| Integration Results |                       |                 |                 |                    |                      |
|---------------------|-----------------------|-----------------|-----------------|--------------------|----------------------|
| No.                 | Retention Time<br>min | Area<br>mAU*min | Height<br>mAU   | Relative Area<br>% | Relative Height<br>% |
| 1                   | 10.342                | 279.566         | 666.368         | 49.97              | 55.82                |
| 2                   | 12.527                | 279.953         | 527.479         | 50.03              | 44.18                |
| <b>Total:</b>       |                       | <b>559.519</b>  | <b>1193.847</b> | <b>100.00</b>      | <b>100.00</b>        |

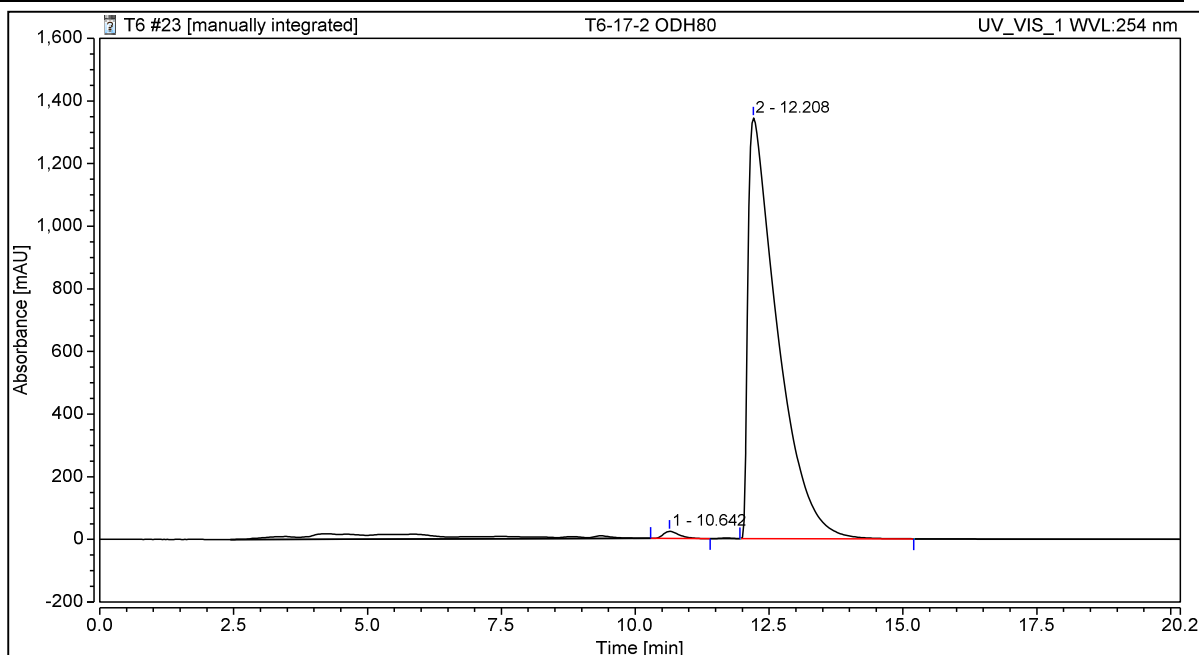

| Integration Results |                       |                 |               |                    |                      |
|---------------------|-----------------------|-----------------|---------------|--------------------|----------------------|
| No.                 | Retention Time<br>min | Area<br>mAU*min | Height<br>mAU | Relative Area<br>% | Relative Height<br>% |
| 1                   | 10.642                | 8.064           | 22.692        | 0.93               | 1.66                 |
| 2                   | 12.208                | 860.159         | 1343.428      | 99.07              | 98.34                |

|               |                |                 |               |               |
|---------------|----------------|-----------------|---------------|---------------|
| <b>Total:</b> | <b>868.223</b> | <b>1366.120</b> | <b>100.00</b> | <b>100.00</b> |
|---------------|----------------|-----------------|---------------|---------------|

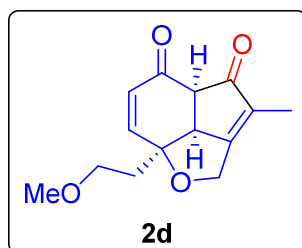

White solid. 86% yield. <sup>1</sup>H NMR (500 MHz, CDCl<sub>3</sub>) δ 6.43 (dd, *J* = 10.4, 1.5 Hz, 1H), 5.86 (d, *J* = 10.3 Hz, 1H), 4.77 (d, *J* = 15.5 Hz, 1H), 4.61 (d, *J* = 15.5 Hz, 1H), 3.69 (d, *J* = 5.7 Hz, 1H), 3.56 – 3.50 (m, 1H), 3.49 (dd, *J* = 3.5, 1.9 Hz, 1H), 3.22 (ddd, *J* = 11.0, 10.0, 3.3 Hz, 1H), 3.18 (s, 3H), 2.22 (ddd, *J* = 14.4, 11.1, 4.7 Hz, 1H), 2.06 (dt, *J* = 14.2, 3.5 Hz, 1H), 1.75 (s, 3H). <sup>13</sup>C NMR (126 MHz, CDCl<sub>3</sub>) δ 200.6, 187.9, 176.2, 148.7, 132.5, 128.3, 78.9, 68.1, 65.1, 60.0, 58.6, 50.3, 39.0, 9.3. HRMS (ESI, *m/z*) calcd for C<sub>14</sub>H<sub>16</sub>O<sub>4</sub> [M+H]<sup>+</sup> 249.1121, found 249.1144. [α]<sub>17D</sub> = -73.4° (c 0.38, CHCl<sub>3</sub>); >99% ee; Chiral HPLC analysis of the product: Daicel Chiralpak OD-H 250X4.6 mm 5u column; hexane/2-propanol = 80/20, detected at 254 nm, flow rate 1 mL/min, Retention times: 27.2 min (major), 34.1 min (major).

| Integration Results |                       |                 |                |                    |                      |
|---------------------|-----------------------|-----------------|----------------|--------------------|----------------------|
| No.                 | Retention Time<br>min | Area<br>mAU*min | Height<br>mAU  | Relative Area<br>% | Relative Height<br>% |
| 1                   | 25.285                | 222.573         | 183.951        | 49.76              | 65.67                |
| 2                   | 29.733                | 224.715         | 96.170         | 50.24              | 34.33                |
| <b>Total:</b>       |                       | <b>447.288</b>  | <b>280.121</b> | <b>100.00</b>      | <b>100.00</b>        |

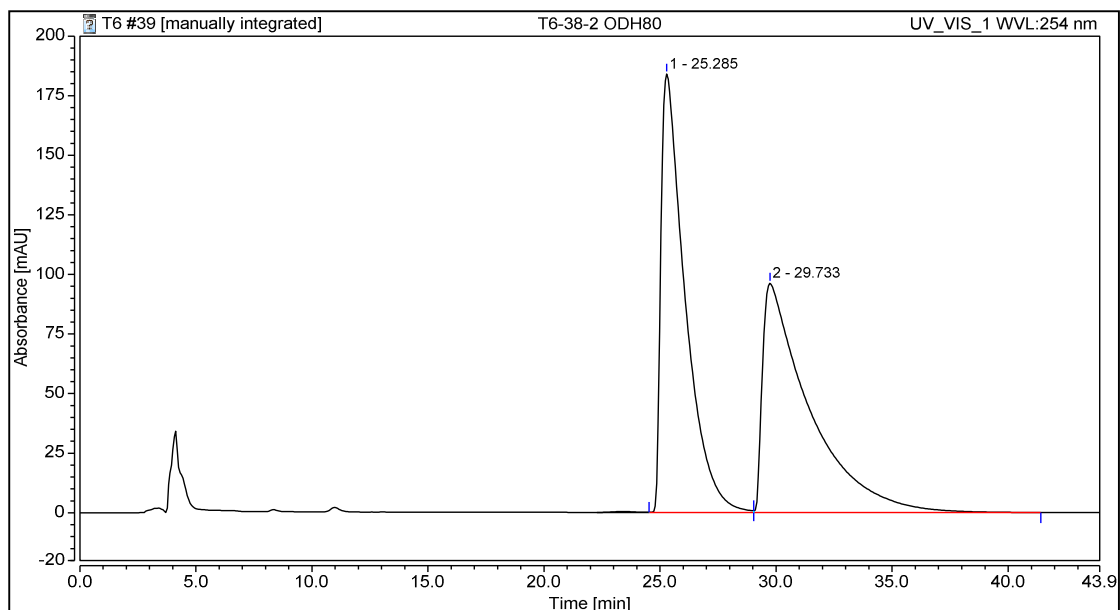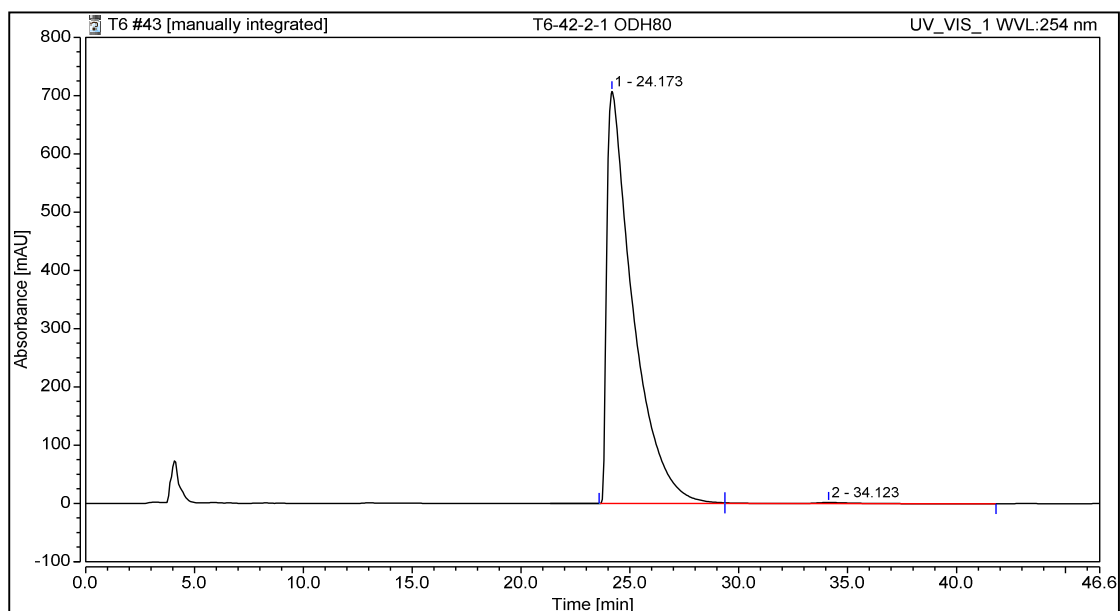

| Integration Results |                       |                 |                |                    |                      |
|---------------------|-----------------------|-----------------|----------------|--------------------|----------------------|
| No.                 | Retention Time<br>min | Area<br>mAU*min | Height<br>mAU  | Relative Area<br>% | Relative Height<br>% |
| 1                   | 24.173                | 981.700         | 707.029        | 99.51              | 99.73                |
| 2                   | 34.123                | 4.792           | 1.917          | 0.49               | 0.27                 |
| <b>Total:</b>       |                       | <b>986.492</b>  | <b>708.946</b> | <b>100.00</b>      | <b>100.00</b>        |

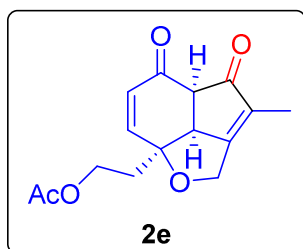

White solid. 60% yield.  $^1\text{H}$  NMR (500 MHz,  $\text{CDCl}_3$ )  $\delta$  6.51 (dd,  $J = 10.4, 1.3$  Hz, 1H), 5.86 (d,  $J = 10.4$  Hz, 1H), 4.79 (d,  $J = 15.6$  Hz, 1H), 4.64 (d,  $J = 15.6$  Hz, 1H), 4.33 (ddd,  $J = 17.2, 12.3, 6.0$  Hz, 1H), 4.01 (ddd,  $J = 11.7, 9.1, 5.1$  Hz, 1H), 3.69 (d,  $J = 5.8$  Hz, 1H), 3.55 – 3.41 (m, 1H), 2.24 (qt,  $J = 14.6, 5.3$  Hz, 2H), 2.03 (s, 3H), 1.77 (s, 3H).  $^{13}\text{C}$  NMR (126 MHz,  $\text{CDCl}_3$ )  $\delta$  199.7, 187.2, 175.5, 170.5, 149.0, 132.8, 128.1, 78.0, 65.4, 60.0, 59.2, 49.3, 38.2, 20.9, 9.3. HRMS (ESI,  $m/z$ ) calcd for  $\text{C}_{15}\text{H}_{16}\text{O}_5$   $[\text{M}+\text{H}]^+$  277.1071, found 277.1091.  $[\alpha]_{\text{D}}^{17} = 46.6^\circ$  (c 0.16,  $\text{CHCl}_3$ ); 98% ee; Chiral HPLC analysis of the product: Daicel Chiralpak AD-H 250X4.6 mm 5u column; hexane/2-propanol = 80/20, detected at 254 nm, flow rate 1 mL/min, Retention times: 11.8 min (minor), 16.0 min (major).

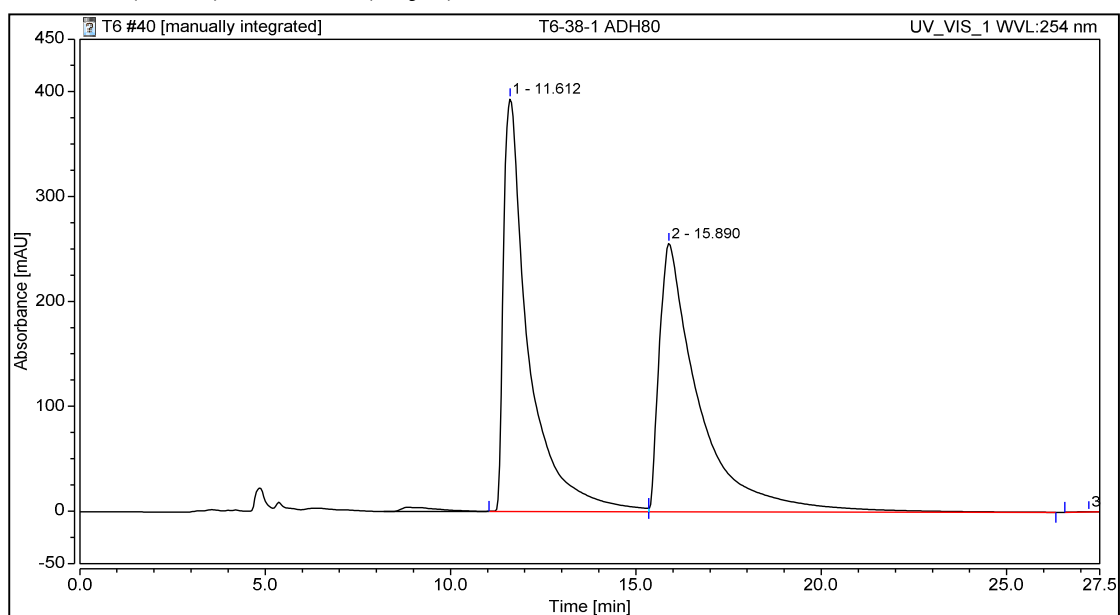

| Integration Results |                       |                 |                |                    |                      |
|---------------------|-----------------------|-----------------|----------------|--------------------|----------------------|
| No.                 | Retention Time<br>min | Area<br>mAU*min | Height<br>mAU  | Relative Area<br>% | Relative Height<br>% |
| 1                   | 11.612                | 308.814         | 393.615        | 49.35              | 60.57                |
| 2                   | 15.890                | 316.740         | 255.950        | 50.62              | 39.39                |
| 3                   | 27.213                | 0.147           | 0.271          | 0.02               | 0.04                 |
| <b>Total:</b>       |                       | <b>625.701</b>  | <b>649.836</b> | <b>100.00</b>      | <b>100.00</b>        |

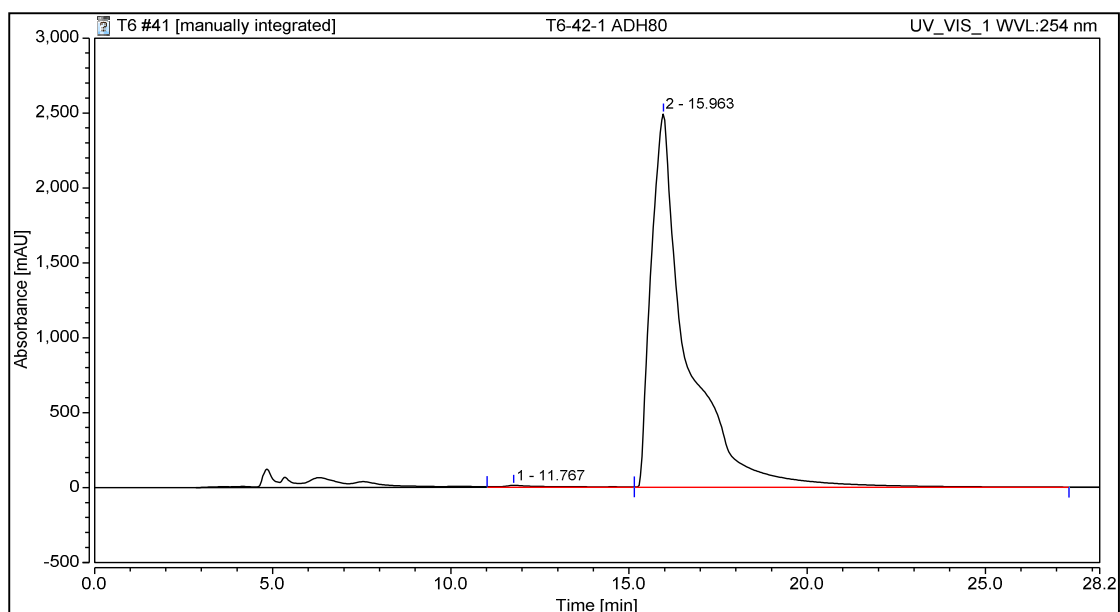

| Integration Results |                       |                 |                 |                    |                      |
|---------------------|-----------------------|-----------------|-----------------|--------------------|----------------------|
| No.                 | Retention Time<br>min | Area<br>mAU*min | Height<br>mAU   | Relative Area<br>% | Relative Height<br>% |
| 1                   | 11.767                | 24.063          | 14.324          | 0.82               | 0.57                 |
| 2                   | 15.963                | 2910.560        | 2491.925        | 99.18              | 99.43                |
| <b>Total:</b>       |                       | <b>2934.623</b> | <b>2506.249</b> | <b>100.00</b>      | <b>100.00</b>        |

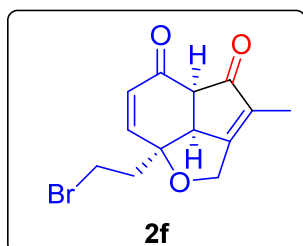

White solid. 65% yield.  $^1\text{H}$  NMR (400 MHz,  $\text{CDCl}_3$ )  $\delta$  6.52 (dd,  $J = 10.4, 1.5$  Hz, 1H), 5.88 (d,  $J = 10.4$  Hz, 1H), 4.80 (d,  $J = 15.6$  Hz, 1H), 4.65 (d,  $J = 15.5$  Hz, 1H), 3.77 (d,  $J = 5.8$  Hz, 1H), 3.64 – 3.45 (m, 2H), 3.37 (dt,  $J = 10.3, 7.8$  Hz, 1H), 2.55 – 2.42 (m, 2H), 1.77 (s, 3H).  $^{13}\text{C}$  NMR (101 MHz,  $\text{CDCl}_3$ )  $\delta$  199.53 (s), 187.05 (s), 174.8, 148.7, 132.8, 128.2, 78.5, 65.5, 59.1, 48.5, 42.6, 25.8, 9.4. HRMS (ESI,  $m/z$ ) calcd for  $\text{C}_{13}\text{H}_{13}\text{BrO}_3$   $[\text{M}+\text{H}]^+$  297.0121, found 297.0113.  $[\alpha]_{\text{D}}^{17} = -97.4^\circ$  (c 0.16,  $\text{CHCl}_3$ ); >99% ee; Chiral HPLC analysis of the product: Daicel Chiralpak OD-H 250X4.6 mm 5 $\mu$  column; hexane/2-propanol = 90/10, detected at 254 nm, flow rate 1 mL/min, Retention times: 41.2 min (minor), 42.4 min (major).

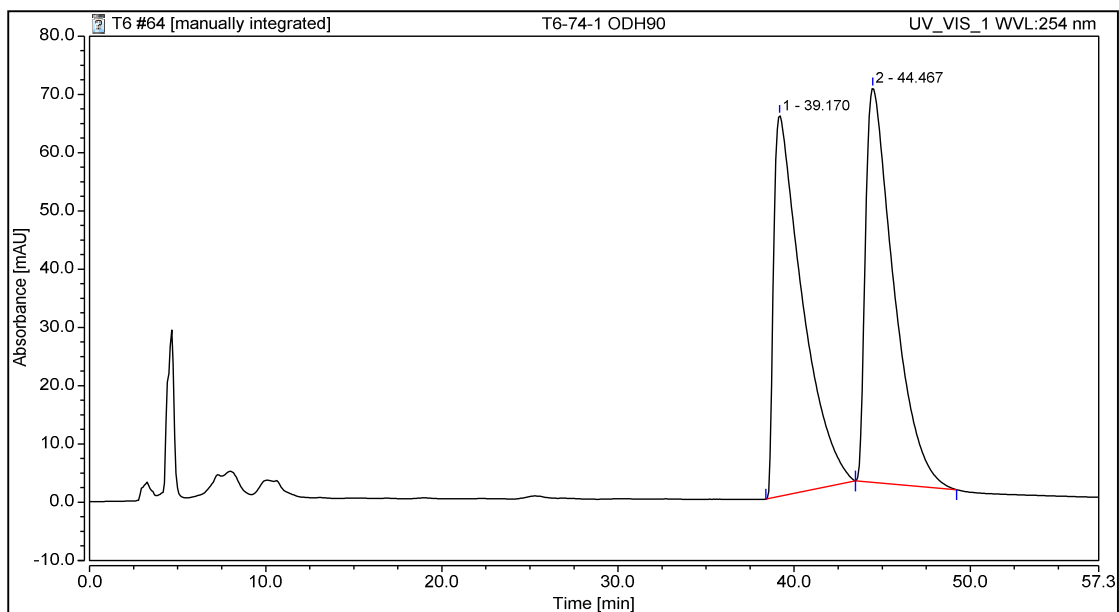

| Integration Results |                       |                 |                |                    |                      |
|---------------------|-----------------------|-----------------|----------------|--------------------|----------------------|
| No.                 | Retention Time<br>min | Area<br>mAU*min | Height<br>mAU  | Relative Area<br>% | Relative Height<br>% |
| 1                   | 24.173                | 981.700         | 707.029        | 99.51              | 99.73                |
| 2                   | 34.123                | 4.792           | 1.917          | 0.49               | 0.27                 |
| <b>Total:</b>       |                       | <b>986.492</b>  | <b>708.946</b> | <b>100.00</b>      | <b>100.00</b>        |

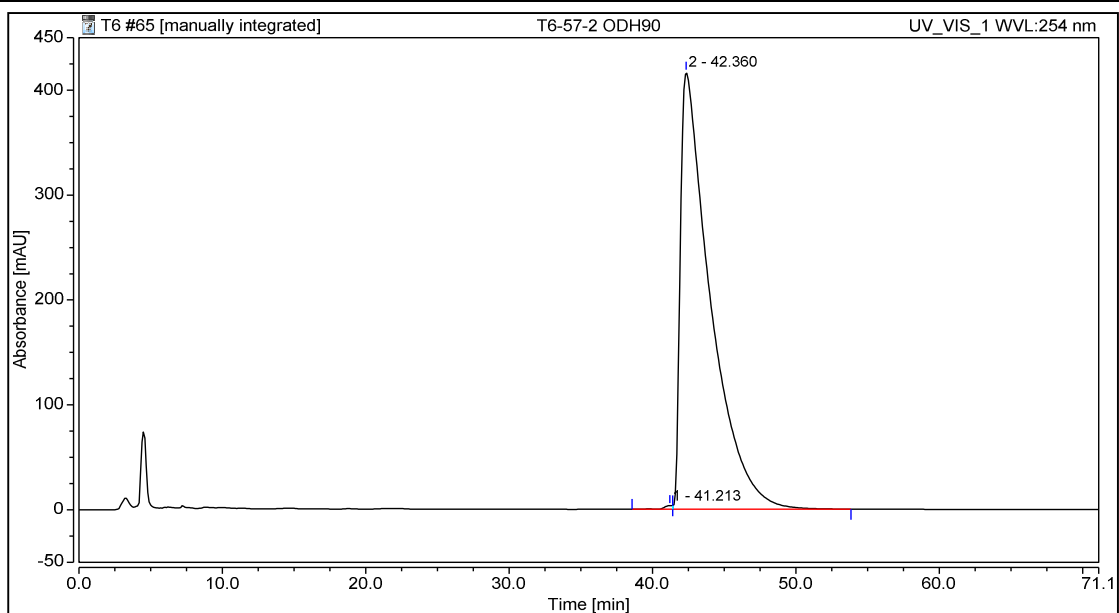

| Integration Results |                       |                 |                |                    |                      |
|---------------------|-----------------------|-----------------|----------------|--------------------|----------------------|
| No.                 | Retention Time<br>min | Area<br>mAU*min | Height<br>mAU  | Relative Area<br>% | Relative Height<br>% |
| 1                   | 41.213                | 2.492           | 3.502          | 0.25               | 0.83                 |
| 2                   | 42.360                | 1008.759        | 416.723        | 99.75              | 99.17                |
| <b>Total:</b>       |                       | <b>1011.251</b> | <b>420.225</b> | <b>100.00</b>      | <b>100.00</b>        |



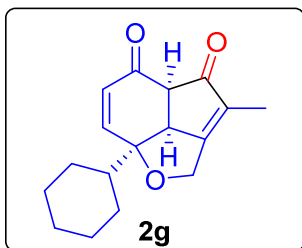

White solid. 60% yield.  $^1\text{H}$  NMR (500 MHz,  $\text{CDCl}_3$ )  $\delta$  6.49 (dd,  $J = 10.5, 1.4$  Hz, 1H), 5.88 (d,  $J = 10.5$  Hz, 1H), 4.75 (d,  $J = 15.5$  Hz, 1H), 4.65 (d,  $J = 15.5$  Hz, 1H), 3.61 (d,  $J = 5.8$  Hz, 1H), 3.45 – 3.30 (m, 1H), 1.96 (d,  $J = 12.5$  Hz, 1H), 1.79 (ddd,  $J = 9.4, 6.9, 3.5$  Hz, 2H), 1.75 (s, 3H), 1.70 (d,  $J = 18.0$  Hz, 2H), 1.35 – 1.19 (m, 3H), 1.18 – 1.05 (m, 1H), 1.04 – 0.93 (m, 2H).  $^{13}\text{C}$  NMR (126 MHz,  $\text{CDCl}_3$ )  $\delta$  200.1, 187.8, 175.9, 149.1, 132.2, 128.1, 81.8, 65.4, 59.9, 47.8, 47.4, 27.9, 27.2, 26.2, 26.2, 26.0, 9.3. HRMS (ESI,  $m/z$ ) calcd for  $\text{C}_{17}\text{H}_{20}\text{O}_3$   $[\text{M}+\text{H}]^+$  273.1485, found 273.1487.  $[\alpha]_{\text{D}}^{17} = 34.2^\circ$  (c 0.20,  $\text{CHCl}_3$ ); >99% ee; Chiral HPLC analysis of the product: Daicel Chiralpak OD-H 250X4.6 mm 5u column; hexane/2-propanol = 90/10, detected at 254 nm, flow rate 1 mL/min, Retention times: 16.1 min (minor), 19.1 min (major).

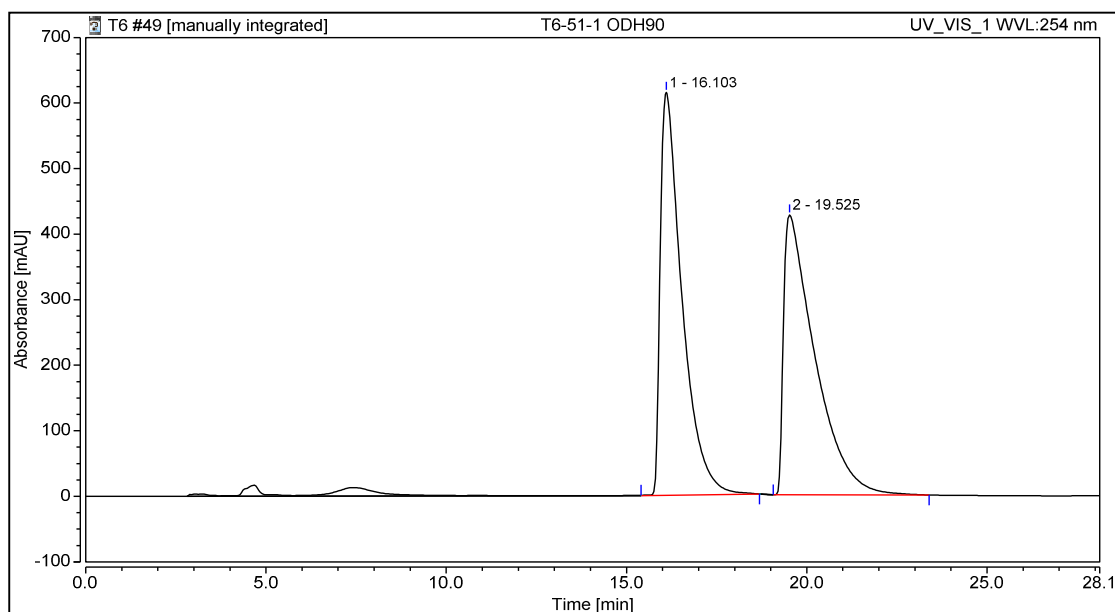

| Integration Results |                       |                 |                 |                    |                      |
|---------------------|-----------------------|-----------------|-----------------|--------------------|----------------------|
| No.                 | Retention Time<br>min | Area<br>mAU*min | Height<br>mAU   | Relative Area<br>% | Relative Height<br>% |
| 1                   | 16.103                | 428.113         | 614.615         | 49.96              | 59.00                |
| 2                   | 19.525                | 428.841         | 427.168         | 50.04              | 41.00                |
| <b>Total:</b>       |                       | <b>856.954</b>  | <b>1041.783</b> | <b>100.00</b>      | <b>100.00</b>        |

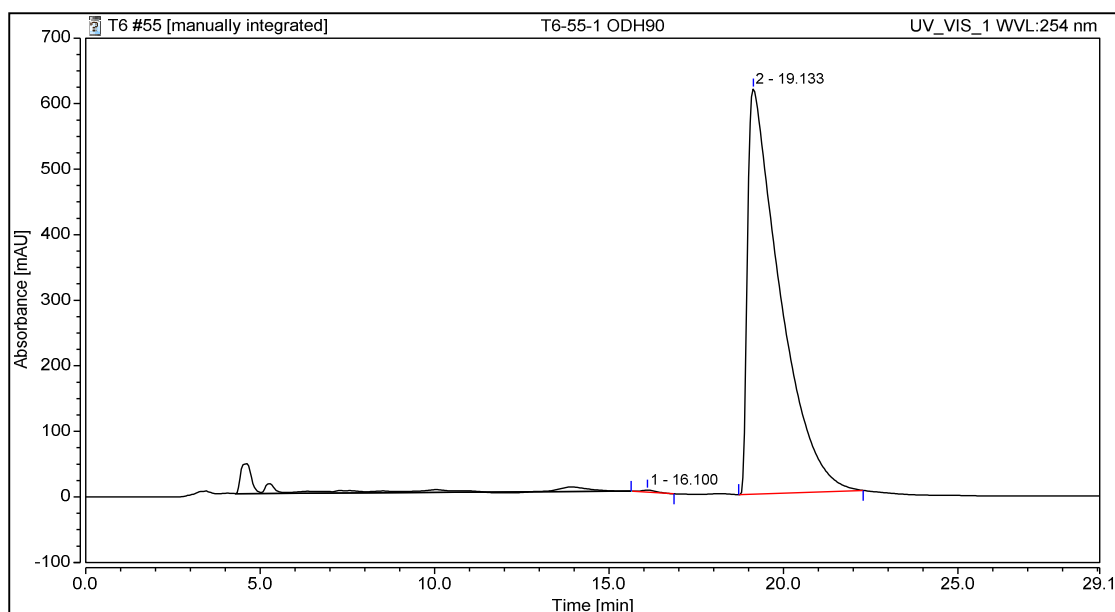

| Integration Results |                       |                 |                |                    |                      |
|---------------------|-----------------------|-----------------|----------------|--------------------|----------------------|
| No.                 | Retention Time<br>min | Area<br>mAU*min | Height<br>mAU  | Relative Area<br>% | Relative Height<br>% |
| 1                   | 16.100                | 1.430           | 2.982          | 0.22               | 0.48                 |
| 2                   | 19.133                | 663.453         | 617.988        | 99.78              | 99.52                |
| <b>Total:</b>       |                       | <b>664.883</b>  | <b>620.970</b> | <b>100.00</b>      | <b>100.00</b>        |

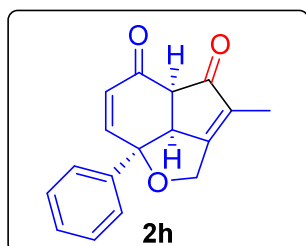

White solid. 80% yield.  $^1\text{H}$  NMR (500 MHz,  $\text{CDCl}_3$ )  $\delta$  7.57 – 7.31 (m, 5H), 6.61 (dd,  $J = 10.3, 1.6$  Hz, 1H), 5.91 (d,  $J = 10.3$  Hz, 1H), 4.99 (d,  $J = 15.4$  Hz, 1H), 4.87 (d,  $J = 15.4$  Hz, 1H), 3.79 (d,  $J = 5.8$  Hz, 1H), 3.73 – 3.55 (m, 1H), 1.82 (s, 3H).  $^{13}\text{C}$  NMR (126 MHz,  $\text{CDCl}_3$ )  $\delta$  197.7, 187.0, 176.6, 151.5, 134.6, 129.7, 129.2, 128.8, 128.3, 126.9, 76.2, 67.2, 60.1, 50.3, 26.4. HRMS (ESI, m/z) calcd for  $\text{C}_{17}\text{H}_{14}\text{O}_3$   $[\text{M}+\text{H}]^+$  267.1016, found 207.1017.  $[\alpha]_{\text{D}}^{17} = -218.7^\circ$  (c 0.81,  $\text{CHCl}_3$ ); >99% ee; Chiral HPLC analysis of the product: Daicel Chiralpak OD-H 250X4.6 mm 5u column; hexane/2-propanol = 90/10, detected at 254 nm, flow rate 1 mL/min, Retention times: 57.0 min (minor), 57.9 min (major).

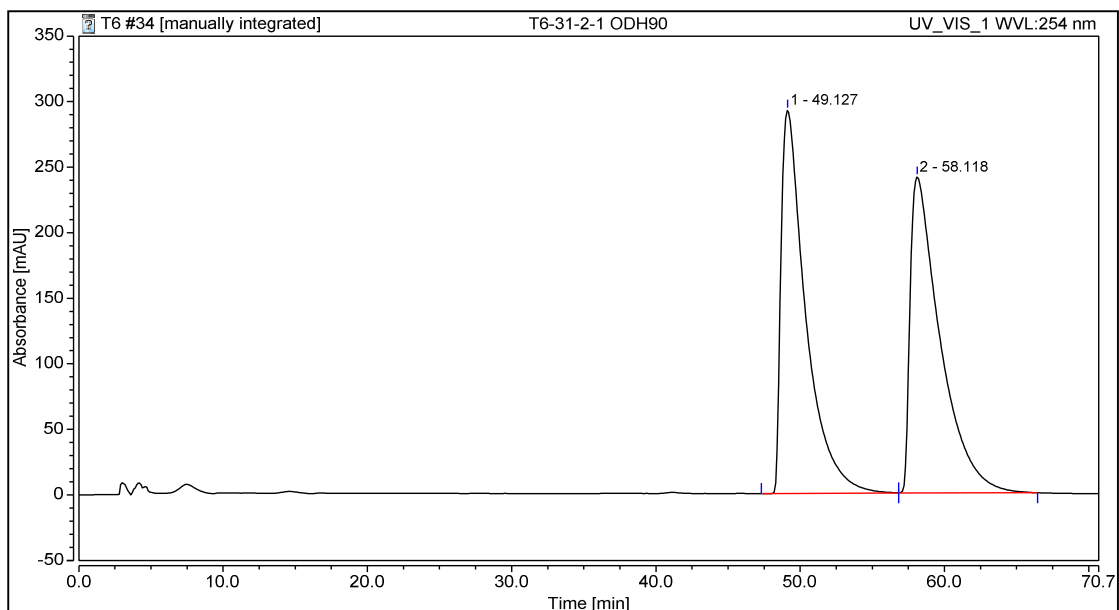

| Integration Results |                       |                 |                |                    |                      |
|---------------------|-----------------------|-----------------|----------------|--------------------|----------------------|
| No.                 | Retention Time<br>min | Area<br>mAU*min | Height<br>mAU  | Relative Area<br>% | Relative Height<br>% |
| 1                   | 49.127                | 581.078         | 292.395        | 50.05              | 54.80                |
| 2                   | 58.118                | 579.976         | 241.195        | 49.95              | 45.20                |
| <b>Total:</b>       |                       | <b>1161.055</b> | <b>533.589</b> | <b>100.00</b>      | <b>100.00</b>        |

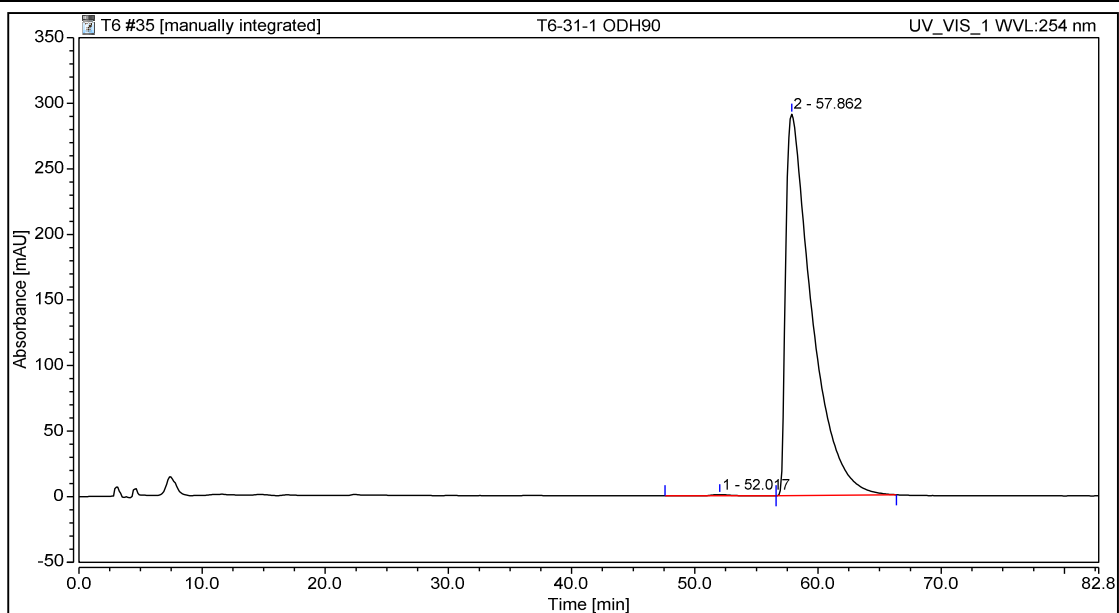

| Integration Results |                       |                 |                |                    |                      |
|---------------------|-----------------------|-----------------|----------------|--------------------|----------------------|
| No.                 | Retention Time<br>min | Area<br>mAU*min | Height<br>mAU  | Relative Area<br>% | Relative Height<br>% |
| 1                   | 52.017                | 1.239           | 0.853          | 0.17               | 0.29                 |
| 2                   | 57.862                | 710.943         | 290.985        | 99.83              | 99.71                |
| <b>Total:</b>       |                       | <b>712.182</b>  | <b>291.838</b> | <b>100.00</b>      | <b>100.00</b>        |

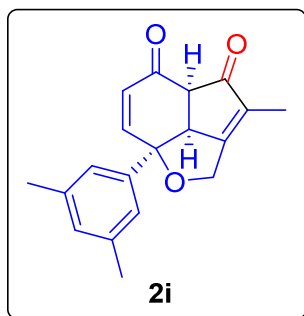

White solid. 57% yield.  $^1\text{H}$  NMR (500 MHz,  $\text{CDCl}_3$ )  $\delta$  7.03 (s, 2H), 6.97 (s, 1H), 6.60 (dd,  $J = 10.3, 1.5$  Hz, 1H), 5.90 (d,  $J = 10.3$  Hz, 1H), 4.98 (d,  $J = 15.4$  Hz, 1H), 4.85 (d,  $J = 15.4$  Hz, 1H), 3.80 (d,  $J = 5.8$  Hz, 1H), 3.74 – 3.63 (m, 1H), 2.33 (s, 6H), 1.81 (s, 3H).  $^{13}\text{C}$  NMR (126 MHz,  $\text{CDCl}_3$ )  $\delta$  199.6, 187.8, 175.2, 149.9, 141.1, 138.8, 132.8, 130.0, 126.4, 122.85, 80.0, 65.9, 59.0, 51.5, 21.5, 9.4. HRMS (ESI,  $m/z$ ) calcd for  $\text{C}_{19}\text{H}_{18}\text{O}_3$   $[\text{M}+\text{H}]^+$  295.1329, found 295.1325.  $[\alpha]_{\text{D}}^{16} = -245.2^\circ$  (c 0.49,  $\text{CHCl}_3$ ); 96% ee; Chiral HPLC analysis of the product: Daicel Chiralpak OD-H 250X4.6 mm 5u column; hexane/2-propanol = 80/20, detected at 254 nm, flow rate 1 mL/min, Retention times: 9.2 min (minor), 10.8 min (major)

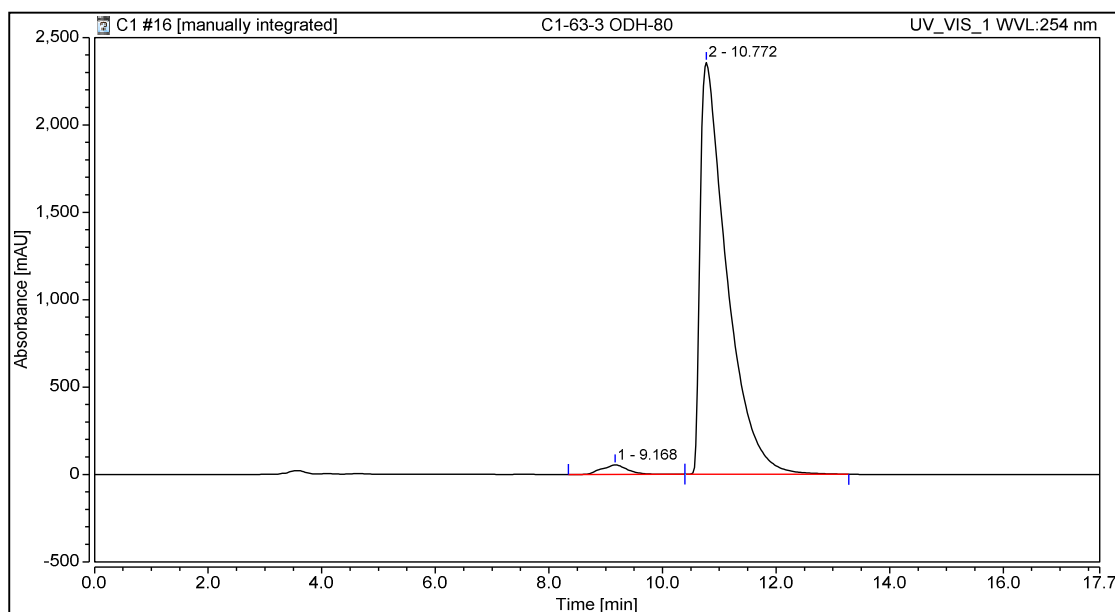

| Integration Results |                       |                 |                 |                    |                      |
|---------------------|-----------------------|-----------------|-----------------|--------------------|----------------------|
| No.                 | Retention Time<br>min | Area<br>mAU*min | Height<br>mAU   | Relative Area<br>% | Relative Height<br>% |
| 1                   | 9.168                 | 28.976          | 54.684          | 2.21               | 2.27                 |
| 2                   | 10.772                | 1279.795        | 2357.296        | 97.79              | 97.73                |
| <b>Total:</b>       |                       | <b>1308.771</b> | <b>2411.980</b> | <b>100.00</b>      | <b>100.00</b>        |

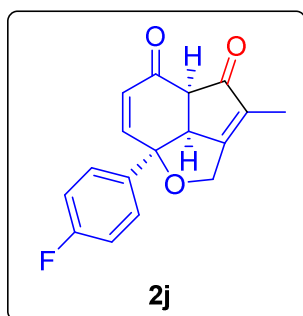

White solid.  $^1\text{H}$  NMR (400 MHz,  $\text{CDCl}_3$ )  $\delta$  7.42 (ddd,  $J = 7.0, 5.1, 2.5$  Hz, 2H), 7.17 – 7.04 (m, 2H), 6.59 (dd,  $J = 10.3, 1.5$  Hz, 1H), 5.92 (d,  $J = 10.3$  Hz, 1H), 5.00 (d,  $J = 15.5$  Hz, 1H), 4.86 (d,  $J = 15.5$  Hz, 1H), 3.78 (d,  $J = 5.8$  Hz, 1H), 3.71 – 3.54 (m, 1H), 1.82 (s, 3H).  $^{13}\text{C}$  NMR (101 MHz,  $\text{CDCl}_3$ )  $\delta$  199.3, 187.5, 174.9, 162.5 (d,  $J = 247.9$  Hz), 149.4, 137.0 (d,  $J = 3.2$  Hz), 133.0, 127.1 (d,  $J = 8.2$  Hz), 126.7, 115.9 (d,  $J = 21.7$  Hz), 79.6, 66.0, 58.8, 51.8, 9.4. 78% yield. HRMS (ESI,  $m/z$ ) calcd for  $\text{C}_{17}\text{H}_{13}\text{FO}_3$   $[\text{M}+\text{H}]^+$  285.0921, found 285.0925.  $[\alpha]_{\text{D}}^{17} = -213.3^\circ$  (c 0.63,  $\text{CHCl}_3$ ); >99% ee; Chiral HPLC analysis of the product: Daicel Chiralpak OD-H 250X4.6 mm 5 $\mu$  column; hexane/2-propanol = 80/20, detected at 254 nm, flow rate 1 mL/min, Retention times: 14.5 min (minor), 21.4 min (major).

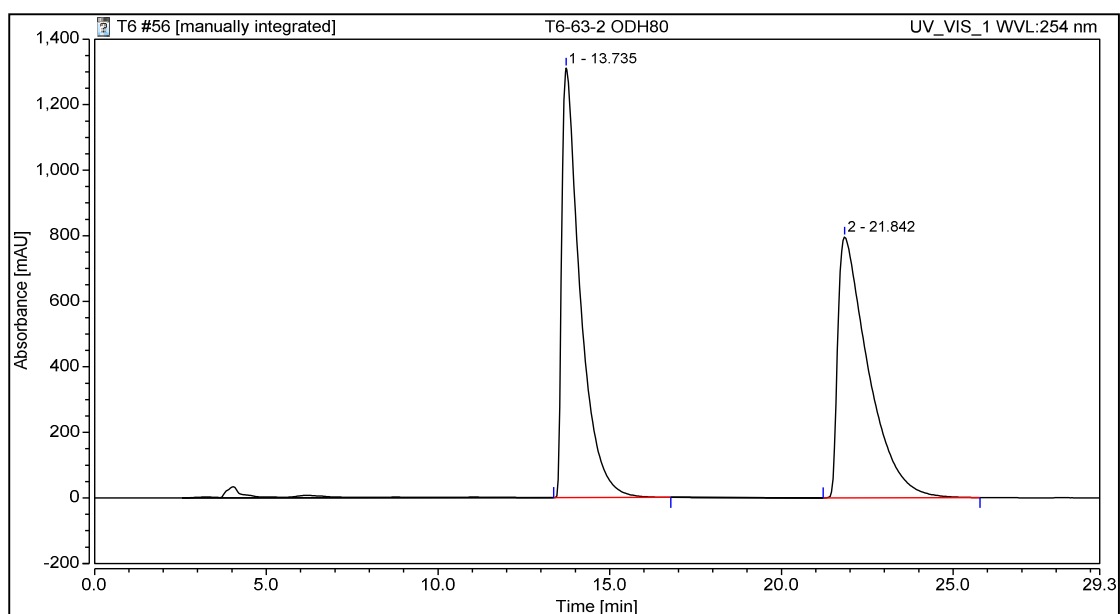

| Integration Results |                       |                 |                 |                    |                      |
|---------------------|-----------------------|-----------------|-----------------|--------------------|----------------------|
| No.                 | Retention Time<br>min | Area<br>mAU*min | Height<br>mAU   | Relative Area<br>% | Relative Height<br>% |
| 1                   | 13.735                | 815.822         | 1310.226        | 49.95              | 62.22                |
| 2                   | 21.842                | 817.494         | 795.454         | 50.05              | 37.78                |
| <b>Total:</b>       |                       | <b>1633.316</b> | <b>2105.680</b> | <b>100.00</b>      | <b>100.00</b>        |

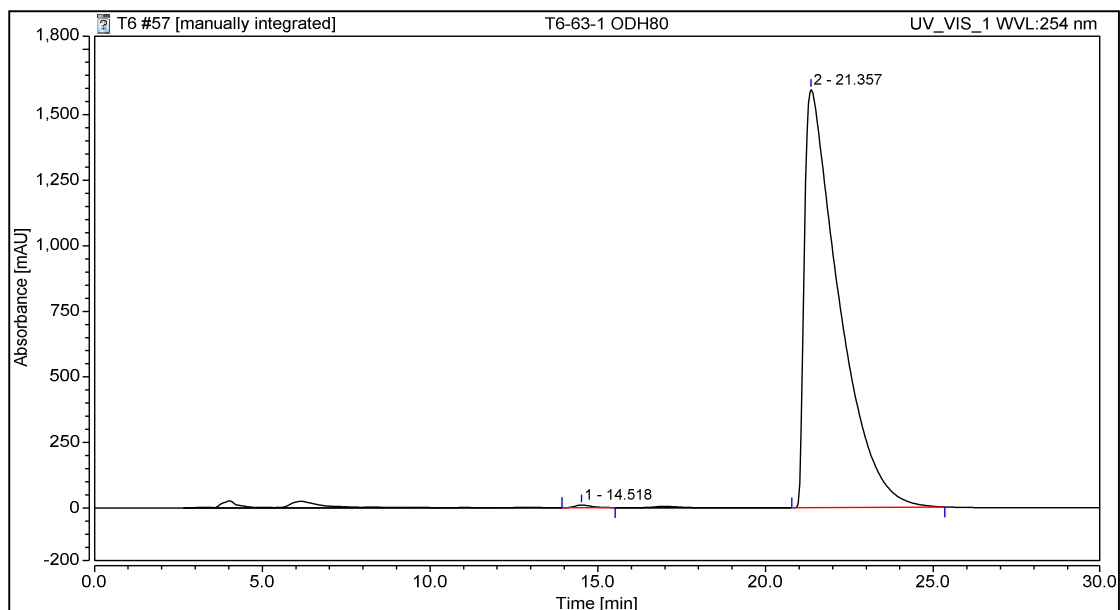

| Integration Results |                       |                 |                 |                    |                      |
|---------------------|-----------------------|-----------------|-----------------|--------------------|----------------------|
| No.                 | Retention Time<br>min | Area<br>mAU*min | Height<br>mAU   | Relative Area<br>% | Relative Height<br>% |
| 1                   | 14.518                | 5.289           | 9.873           | 0.28               | 0.62                 |
| 2                   | 21.357                | 1903.349        | 1595.223        | 99.72              | 99.38                |
| <b>Total:</b>       |                       | <b>1908.638</b> | <b>1605.096</b> | <b>100.00</b>      | <b>100.00</b>        |

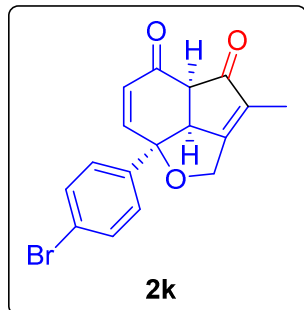

White solid. 84% yield.  $^1\text{H}$  NMR (500 MHz,  $\text{CDCl}_3$ )  $\delta$  7.60 – 7.46 (m, 2H), 7.40 – 7.28 (m, 2H), 6.57 (dd,  $J = 10.3, 1.6$  Hz, 1H), 5.92 (d,  $J = 10.3$  Hz, 1H), 4.99 (d,  $J = 15.4$  Hz, 1H), 4.86 (d,  $J = 15.5$  Hz, 1H), 3.77 (d,  $J = 5.8$  Hz, 1H), 3.69 – 3.56 (m, 1H), 1.81 (s, 3H).  $^{13}\text{C}$  NMR (126 MHz,  $\text{CDCl}_3$ )  $\delta$  199.1, 187.4, 174.6, 149.1, 140.3, 133.1, 132.1, 127.0, 126.9, 122.5, 79.6, 66.0, 58.7, 51.7, 9.4. HRMS (ESI,  $m/z$ ) calcd for  $\text{C}_{17}\text{H}_{13}\text{BrO}_3$   $[\text{M}+\text{H}]^+$  345.0121, found 345.0123.  $[\alpha]_{\text{D}}^{17} = -199.0^\circ$  (c 0.50,  $\text{CHCl}_3$ ); >99% ee; Chiral HPLC analysis of the product: Daicel Chiralpak OD-H 250X4.6 mm 5u column; hexane/2-propanol = 90/10, detected at 254 nm, flow rate 1 mL/min, Retention times: 31.7 min (minor), 50.8 min (major).

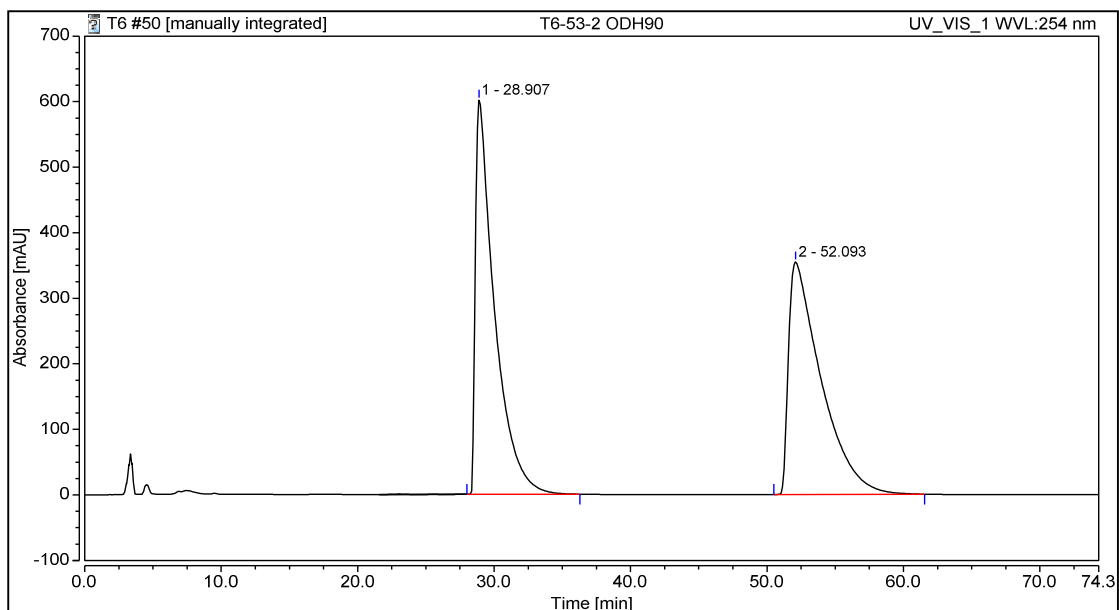

| Integration Results |                       |                 |                |                    |                      |
|---------------------|-----------------------|-----------------|----------------|--------------------|----------------------|
| No.                 | Retention Time<br>min | Area<br>mAU*min | Height<br>mAU  | Relative Area<br>% | Relative Height<br>% |
| 1                   | 28.907                | 976.513         | 601.434        | 49.98              | 62.90                |
| 2                   | 52.093                | 977.309         | 354.697        | 50.02              | 37.10                |
| <b>Total:</b>       |                       | <b>1953.822</b> | <b>956.132</b> | <b>100.00</b>      | <b>100.00</b>        |

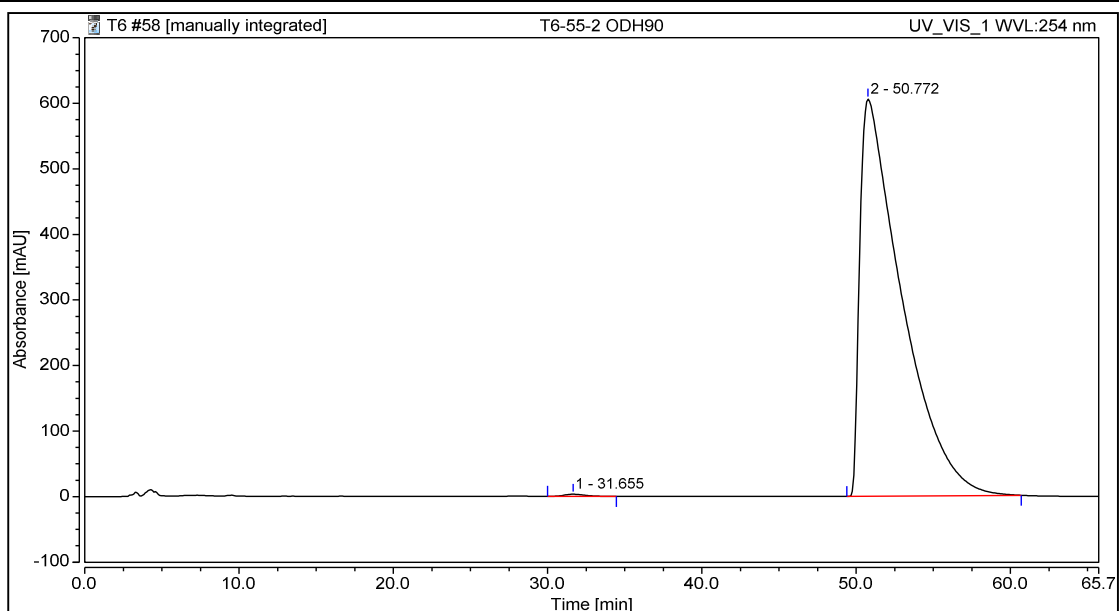

| Integration Results |                       |                 |                |                    |                      |
|---------------------|-----------------------|-----------------|----------------|--------------------|----------------------|
| No.                 | Retention Time<br>min | Area<br>mAU*min | Height<br>mAU  | Relative Area<br>% | Relative Height<br>% |
| 1                   | 31.655                | 5.001           | 3.252          | 0.26               | 0.53                 |
| 2                   | 50.772                | 1911.510        | 606.015        | 99.74              | 99.47                |
| <b>Total:</b>       |                       | <b>1916.511</b> | <b>609.268</b> | <b>100.00</b>      | <b>100.00</b>        |

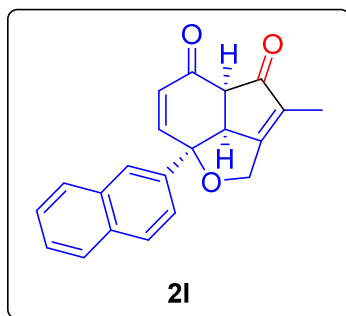

White solid. 56% yield.  $^1\text{H}$  NMR (500 MHz,  $\text{CDCl}_3$ )  $\delta$  7.98 – 7.75 (m, 4H), 7.64 – 7.38 (m, 3H), 6.68 (dd,  $J = 10.3, 1.6$  Hz, 1H), 5.98 (d,  $J = 10.3$  Hz, 1H), 5.15 – 5.00 (m, 1H), 4.93 (d,  $J = 15.4$  Hz, 1H), 3.84 (d,  $J = 5.8$  Hz, 1H), 3.74 (ddd,  $J = 29.7, 15.7, 4.1$  Hz, 1H), 1.84 (s, 3H).  $^{13}\text{C}$  NMR (126 MHz,  $\text{CDCl}_3$ )  $\delta$  199.5, 187.7, 175.0, 149.6, 138.4, 133.1, 133.0, 133.0, 129.07, 128.2, 127.7, 126.8, 126.8, 126.7, 124.3, 122.7, 80.1, 66.1, 58.9, 51.7, 9.4. HRMS (ESI, m/z) calcd for  $\text{C}_{21}\text{H}_{16}\text{O}_3$   $[\text{M}+\text{H}]^+$  317.1172, found 317.1169.  $[\alpha]_{\text{D}}^{16} = -253.2^\circ$  (c 0.60,  $\text{CHCl}_3$ ); >99% ee; Chiral HPLC analysis of the product: Daicel Chiralpak OD-H 250X4.6 mm 5u column; hexane/2-propanol = 80/20, detected at 254 nm, flow rate 1 mL/min, Retention times: 24.2 min (minor), 35.3 min (major).

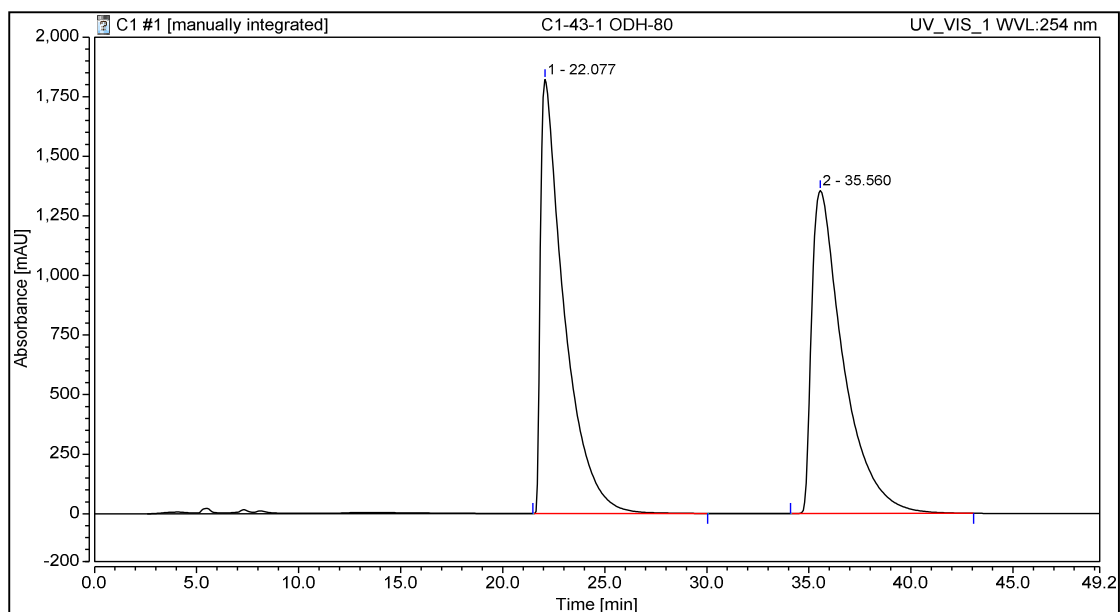

| Integration Results |                       |                 |                 |                    |                      |
|---------------------|-----------------------|-----------------|-----------------|--------------------|----------------------|
| No.                 | Retention Time<br>min | Area<br>mAU*min | Height<br>mAU   | Relative Area<br>% | Relative Height<br>% |
| 1                   | 22.077                | 2440.345        | 1820.914        | 50.11              | 57.35                |
| 2                   | 35.560                | 2429.909        | 1354.067        | 49.89              | 42.65                |
| <b>Total:</b>       |                       | <b>4870.254</b> | <b>3174.981</b> | <b>100.00</b>      | <b>100.00</b>        |



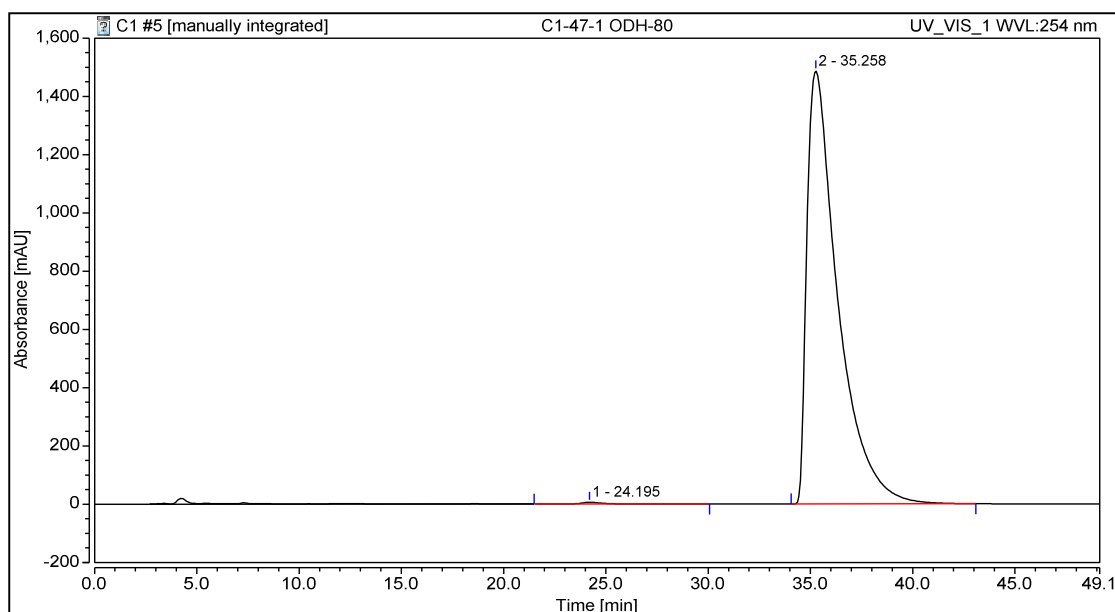

| Integration Results |                       |                 |                 |                    |                      |
|---------------------|-----------------------|-----------------|-----------------|--------------------|----------------------|
| No.                 | Retention Time<br>min | Area<br>mAU*min | Height<br>mAU   | Relative Area<br>% | Relative Height<br>% |
| 1                   | 24.195                | 6.838           | 5.932           | 0.26               | 0.40                 |
| 2                   | 35.258                | 2601.655        | 1486.663        | 99.74              | 99.60                |
| <b>Total:</b>       |                       | <b>2608.493</b> | <b>1492.595</b> | <b>100.00</b>      | <b>100.00</b>        |

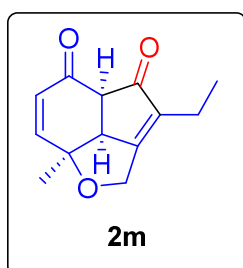

White solid. 86% yield.  $^1\text{H}$  NMR (400 MHz,  $\text{CDCl}_3$ )  $\delta$  6.59 (dd,  $J = 10.3, 1.6$  Hz, 1H), 5.77 (d,  $J = 10.3$  Hz, 1H), 4.85 (d,  $J = 15.8$  Hz, 1H), 4.68 (d,  $J = 15.8$  Hz, 1H), 3.67 (d,  $J = 5.8$  Hz, 1H), 3.48 – 3.30 (m, 1H), 2.35 – 2.10 (m, 2H), 1.61 (s, 3H), 1.04 (t,  $J = 7.6$  Hz, 3H).  $^{13}\text{C}$  NMR (101 MHz,  $\text{CDCl}_3$ )  $\delta$  199.5, 187.4, 175.2, 151.4, 138.3, 126.6, 76.4, 65.8, 60.0, 53.4, 26.4, 17.9, 12.0. HRMS (ESI,  $m/z$ ) calcd for  $\text{C}_{13}\text{H}_{14}\text{O}_3$   $[\text{M}+\text{H}]^+$  219.1016, found 219.1023.  $[\alpha]_{\text{D}}^{16} = -17.8^\circ$  (c 0.63,  $\text{CHCl}_3$ ); >99% ee; Chiral HPLC analysis of the product: Phenomenex 00G-4457-E0 250X4.6 mm 5u column; hexane/2-propanol = 70/30, detected at 254 nm, flow rate 1 mL/min, Retention times: 22.3 min (minor), 23.9 min (major).

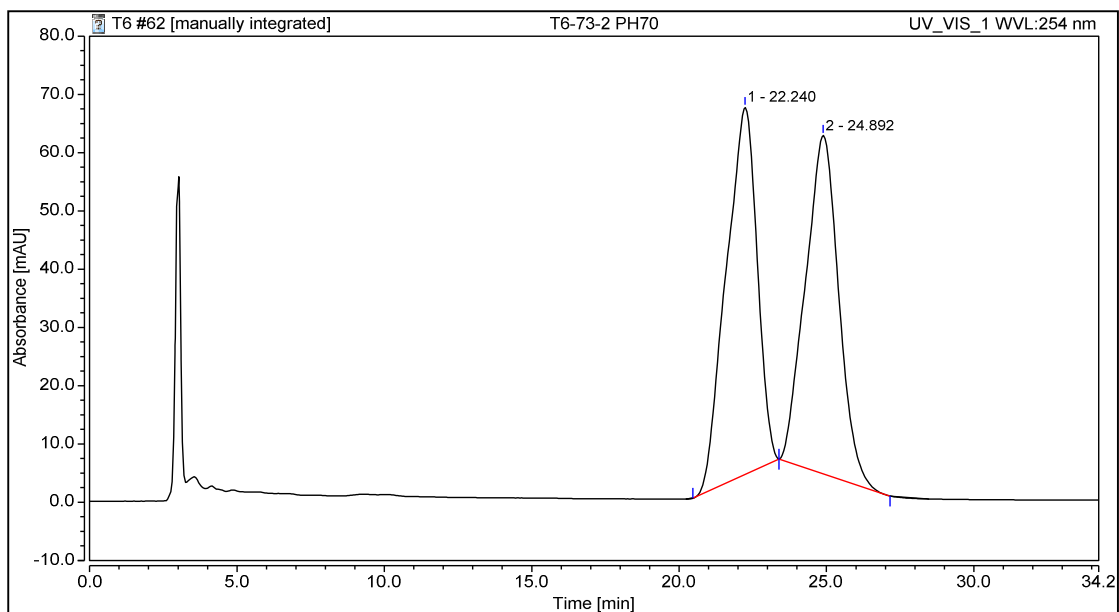

| Integration Results |                       |                 |                |                    |                      |
|---------------------|-----------------------|-----------------|----------------|--------------------|----------------------|
| No.                 | Retention Time<br>min | Area<br>mAU*min | Height<br>mAU  | Relative Area<br>% | Relative Height<br>% |
| 1                   | 22.240                | 76.860          | 63.035         | 50.25              | 52.03                |
| 2                   | 24.892                | 76.108          | 58.121         | 49.75              | 47.97                |
| <b>Total:</b>       |                       | <b>152.968</b>  | <b>121.156</b> | <b>100.00</b>      | <b>100.00</b>        |

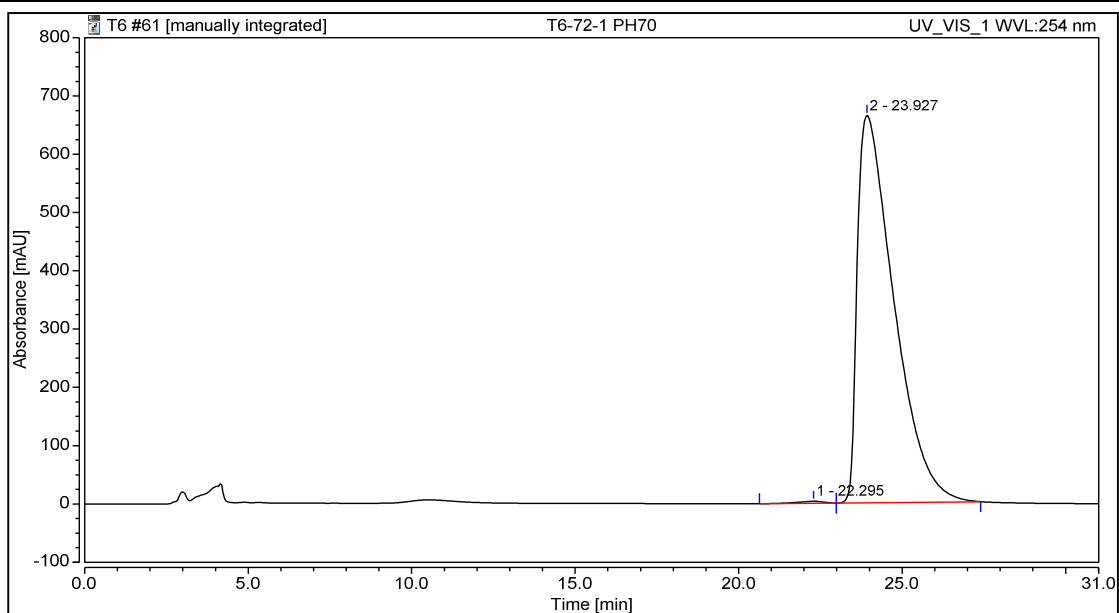

| Integration Results |                       |                 |                |                    |                      |
|---------------------|-----------------------|-----------------|----------------|--------------------|----------------------|
| No.                 | Retention Time<br>min | Area<br>mAU*min | Height<br>mAU  | Relative Area<br>% | Relative Height<br>% |
| 1                   | 22.295                | 3.187           | 3.563          | 0.37               | 0.53                 |
| 2                   | 23.927                | 861.772         | 665.054        | 99.63              | 99.47                |
| <b>Total:</b>       |                       | <b>864.960</b>  | <b>668.617</b> | <b>100.00</b>      | <b>100.00</b>        |

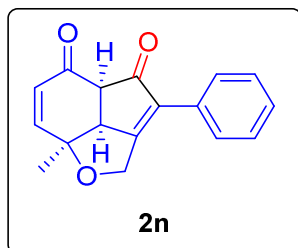

White solid. 65% yield.  $^1\text{H}$  NMR (500 MHz,  $\text{CDCl}_3$ )  $\delta$  7.56 – 7.31 (m, 5H), 6.60 (dd,  $J = 10.3, 1.1$  Hz, 1H), 5.81 (d,  $J = 10.3$  Hz, 1H), 5.17 (d,  $J = 16.7$  Hz, 1H), 4.76 (dd,  $J = 16.6, 1.5$  Hz, 1H), 3.85 (d,  $J = 6.0$  Hz, 1H), 3.58 (d,  $J = 4.5$  Hz, 1H), 1.67 (s, 3H).  $^{13}\text{C}$  NMR (126 MHz,  $\text{CDCl}_3$ )  $\delta$  197.7, 187.0, 176.6, 151.5, 134.6, 129.7, 129.2, 128.8, 128.3, 126.9, 76.6, 67.2, 60.1, 50.3, 26.4. HRMS (ESI,  $m/z$ ) calcd for  $\text{C}_{21}\text{H}_{16}\text{O}_3$   $[\text{M}+\text{H}]^+$  267.1016, found 267.1019. 99% ee; Chiral HPLC analysis of the product: Daicel Chiralpak OD-H 250X4.6 mm 5u column; hexane/2-propanol = 80/20, detected at 254 nm, flow rate 1 mL/min, Retention times: 22.2 min (minor), 25.7 min (major).

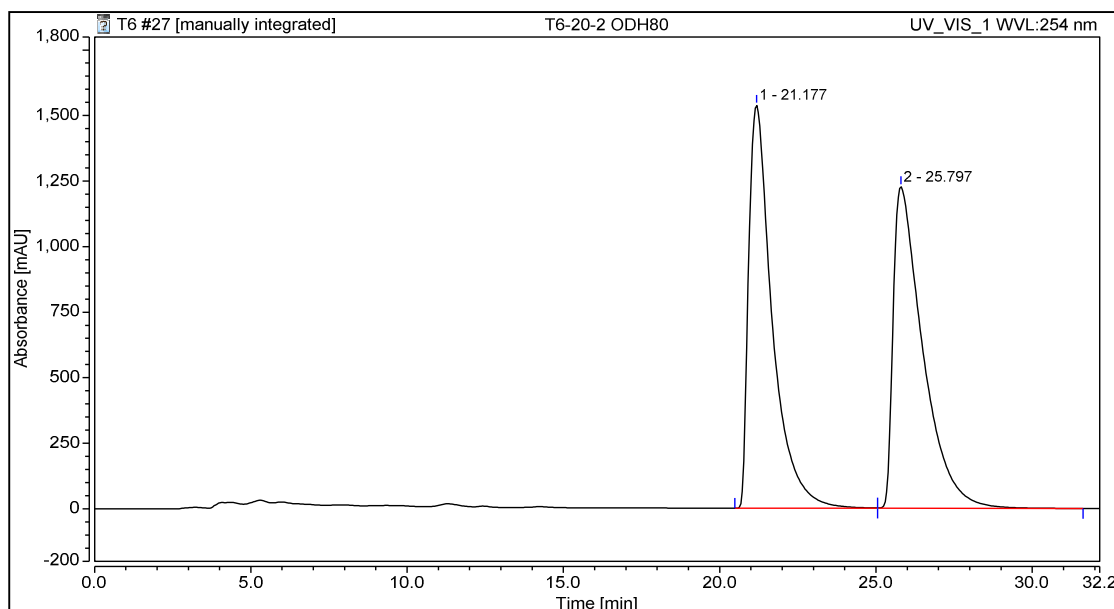

| Integration Results |                       |                 |                 |                    |                      |
|---------------------|-----------------------|-----------------|-----------------|--------------------|----------------------|
| No.                 | Retention Time<br>min | Area<br>mAU*min | Height<br>mAU   | Relative Area<br>% | Relative Height<br>% |
| 1                   | 21.177                | 1349.487        | 1537.035        | 50.02              | 55.62                |
| 2                   | 25.797                | 1348.474        | 1226.494        | 49.98              | 44.38                |
| <b>Total:</b>       |                       | <b>2697.960</b> | <b>2763.529</b> | <b>100.00</b>      | <b>100.00</b>        |

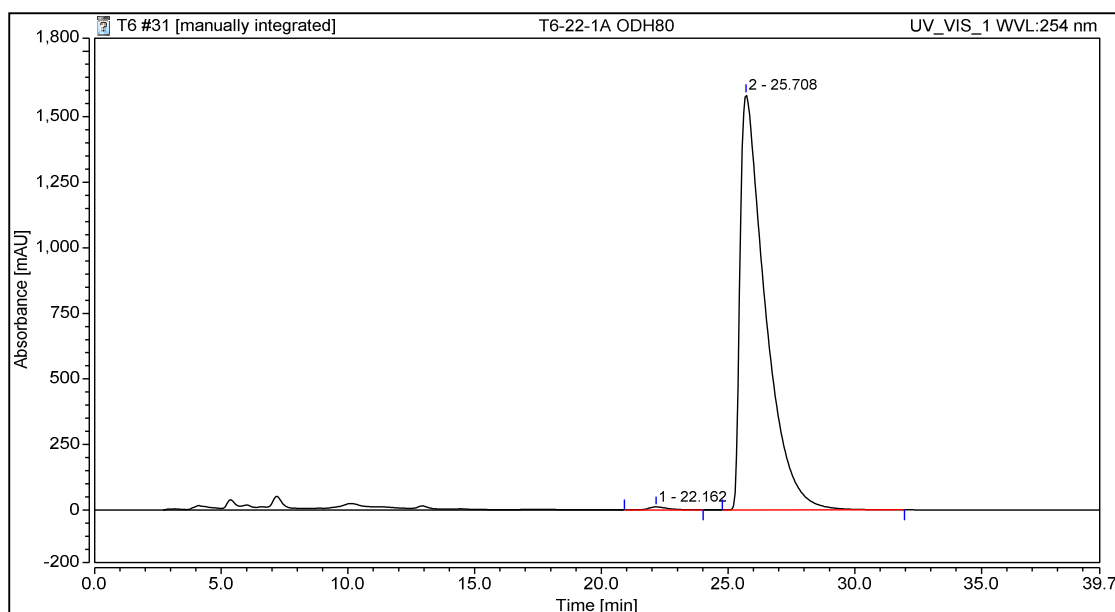

| Integration Results |                       |                 |                 |                    |                      |
|---------------------|-----------------------|-----------------|-----------------|--------------------|----------------------|
| No.                 | Retention Time<br>min | Area<br>mAU*min | Height<br>mAU   | Relative Area<br>% | Relative Height<br>% |
| 1                   | 22.162                | 9.941           | 11.417          | 0.54               | 0.72                 |
| 2                   | 25.708                | 1822.960        | 1582.922        | 99.46              | 99.28                |
| <b>Total:</b>       |                       | <b>1832.901</b> | <b>1594.339</b> | <b>100.00</b>      | <b>100.00</b>        |

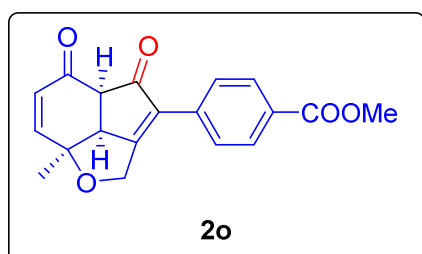

White solid. 79% yield.  $^1\text{H}$  NMR (500 MHz,  $\text{CDCl}_3$ )  $\delta$  8.05 (d,  $J = 8.5$  Hz, 2H), 7.55 (d,  $J = 8.4$  Hz, 2H), 6.62 (dd,  $J = 10.3, 1.5$  Hz, 1H), 5.83 (d,  $J = 10.3$  Hz, 1H), 5.20 (dd,  $J = 16.9, 1.1$  Hz, 1H), 4.77 (dd,  $J = 16.9, 1.7$  Hz, 1H), 3.92 (s, 3H), 3.87 (d,  $J = 6.0$  Hz, 1H), 3.70 – 3.57 (m, 1H), 1.68 (s, 3H).  $^{13}\text{C}$  NMR (126 MHz,  $\text{CDCl}_3$ )  $\delta$  197.3, 186.6, 178.8, 166.4, 151.5, 133.9, 133.7, 130.4, 129.9, 128.1, 127.0, 76.2, 67.2, 60.1, 52.3, 50.6, 26.3. HRMS (ESI,  $m/z$ ) calcd for  $\text{C}_{19}\text{H}_{16}\text{O}_5$   $[\text{M}+\text{H}]^+$  325.1071, found 325.1076.  $[\alpha]_{\text{D}}^{17} = -52.5^\circ$  (c 0.83,  $\text{CHCl}_3$ ); >99% ee; Chiral HPLC analysis of the product: Daicel Chiralpak AD-H 250X4.6 mm 5u column; hexane/2-propanol = 80/20, detected at 254 nm, flow rate 1 mL/min, Retention times: 31.4 min (minor), 36.6 min (major).

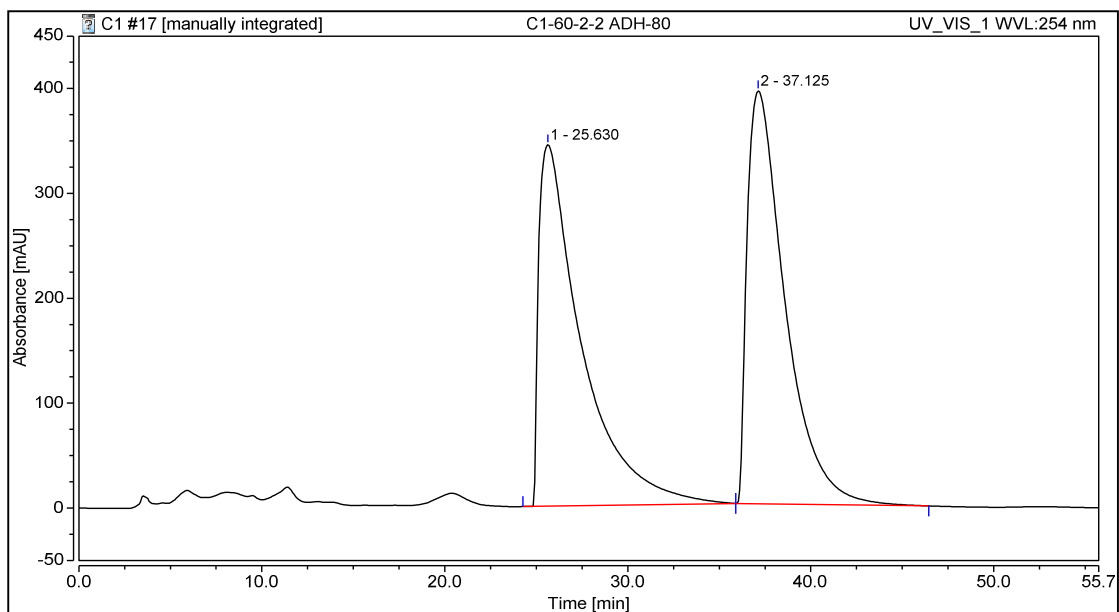

| Integration Results |                       |                 |                |                    |                      |
|---------------------|-----------------------|-----------------|----------------|--------------------|----------------------|
| No.                 | Retention Time<br>min | Area<br>mAU*min | Height<br>mAU  | Relative Area<br>% | Relative Height<br>% |
| 1                   | 25.630                | 929.197         | 344.582        | 49.58              | 46.67                |
| 2                   | 37.125                | 944.765         | 393.680        | 50.42              | 53.33                |
| <b>Total:</b>       |                       | <b>1873.961</b> | <b>738.262</b> | <b>100.00</b>      | <b>100.00</b>        |

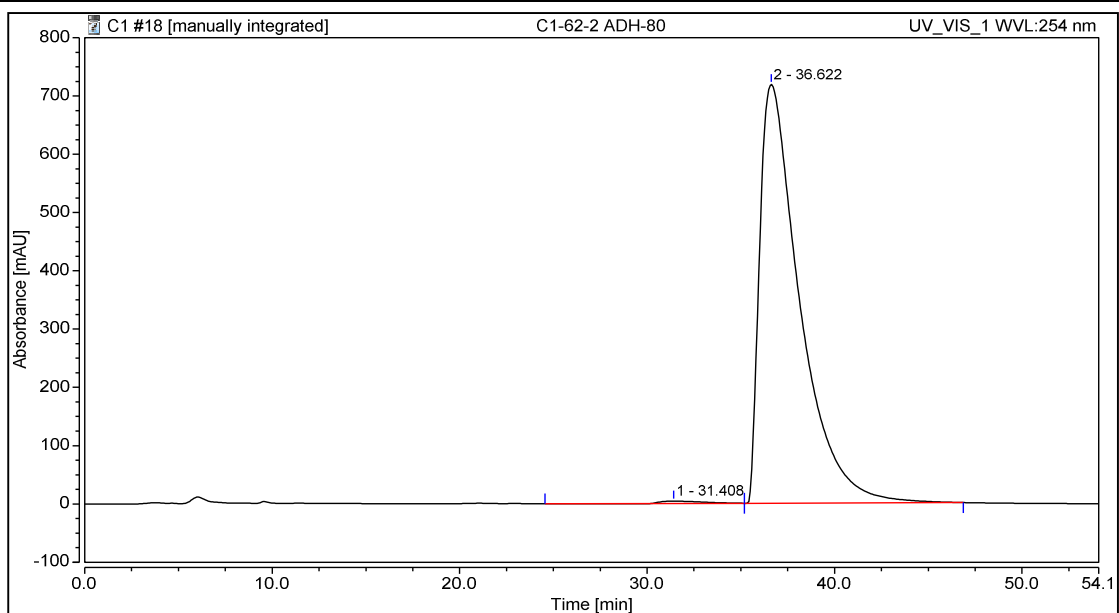

| Integration Results |                       |                 |                |                    |                      |
|---------------------|-----------------------|-----------------|----------------|--------------------|----------------------|
| No.                 | Retention Time<br>min | Area<br>mAU*min | Height<br>mAU  | Relative Area<br>% | Relative Height<br>% |
| 1                   | 31.408                | 9.006           | 3.989          | 0.50               | 0.55                 |
| 2                   | 36.622                | 1776.116        | 718.712        | 99.50              | 99.45                |
| <b>Total:</b>       |                       | <b>1785.123</b> | <b>722.700</b> | <b>100.00</b>      | <b>100.00</b>        |

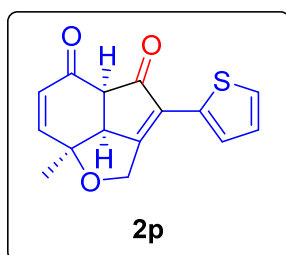

White solid. 60% yield.  $^1\text{H}$  NMR (500 MHz,  $\text{CDCl}_3$ )  $\delta$  7.51 (d,  $J = 3.6$  Hz, 1H), 7.43 (d,  $J = 5.0$  Hz, 1H), 7.20 – 7.05 (m, 1H), 6.67 – 6.56 (m, 1H), 5.81 (d,  $J = 10.3$  Hz, 1H), 5.06 (dd,  $J = 17.1, 1.8$  Hz, 1H), 4.85 (dd,  $J = 17.1, 2.1$  Hz, 1H), 3.84 (d,  $J = 5.9$  Hz, 1H), 3.58 (dt,  $J = 12.8, 5.4$  Hz, 1H), 1.66 (s, 3H).  $^{13}\text{C}$  NMR (126 MHz,  $\text{CDCl}_3$ )  $\delta$  196.4, 186.6, 172.9, 151.3, 131.5, 128.9, 127.8, 127.7, 127.5, 127.1, 76.5, 67.0, 59.4, 50.6, 26.3. 97% ee; Chiral HPLC analysis of the product: Daicel Chiralpak OD-H 250X4.6 mm 5u column; hexane/2-propanol = 80/20, detected at 254 nm, flow rate 1 mL/min, Retention times: 22.5 min (minor), 31.2 min (major).

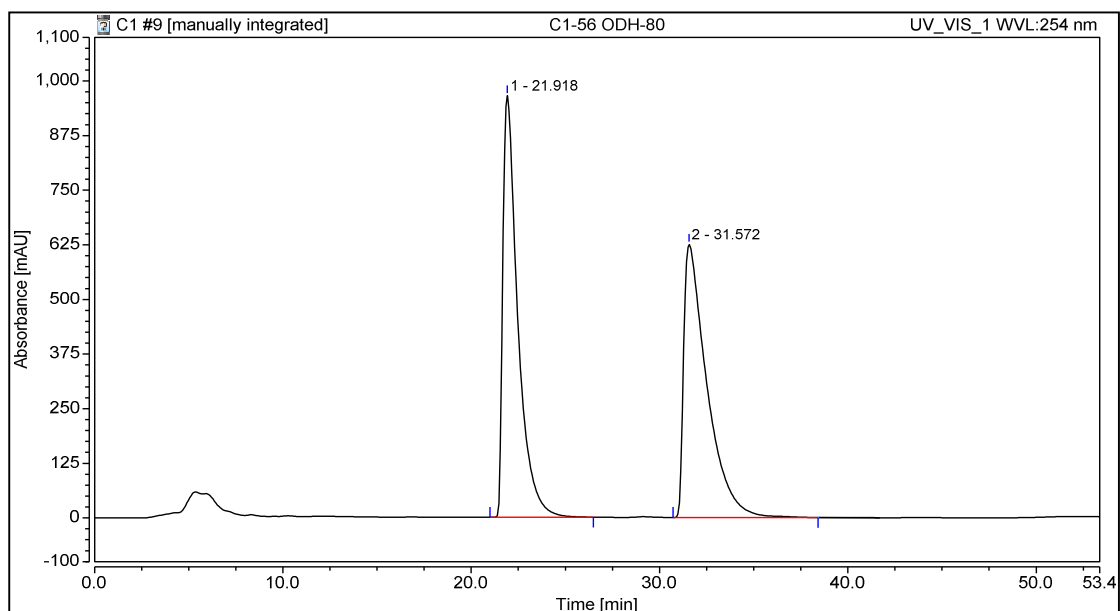

| Integration Results |                       |                 |                 |                    |                      |
|---------------------|-----------------------|-----------------|-----------------|--------------------|----------------------|
| No.                 | Retention Time<br>min | Area<br>mAU*min | Height<br>mAU   | Relative Area<br>% | Relative Height<br>% |
| 1                   | 21.918                | 890.410         | 964.679         | 49.88              | 60.68                |
| 2                   | 31.572                | 894.625         | 625.086         | 50.12              | 39.32                |
| <b>Total:</b>       |                       | <b>1785.034</b> | <b>1589.765</b> | <b>100.00</b>      | <b>100.00</b>        |

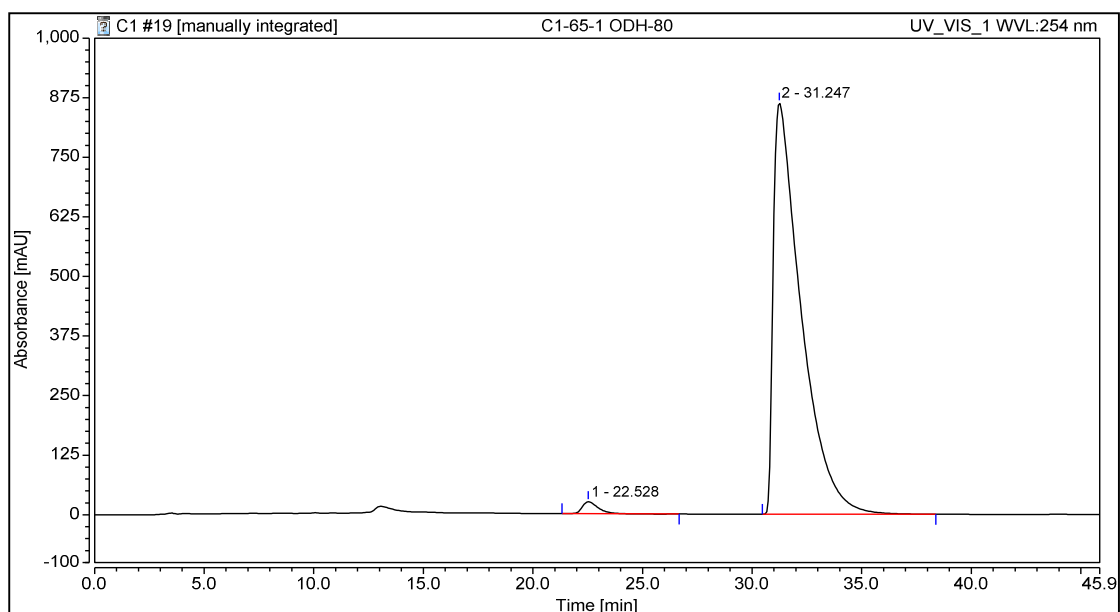

| Integration Results |                       |                 |                |                    |                      |
|---------------------|-----------------------|-----------------|----------------|--------------------|----------------------|
| No.                 | Retention Time<br>min | Area<br>mAU*min | Height<br>mAU  | Relative Area<br>% | Relative Height<br>% |
| 1                   | 22.528                | 20.687          | 25.273         | 1.60               | 2.85                 |
| 2                   | 31.247                | 1272.386        | 862.840        | 98.40              | 97.15                |
| <b>Total:</b>       |                       | <b>1293.073</b> | <b>888.113</b> | <b>100.00</b>      | <b>100.00</b>        |

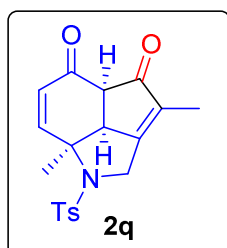

White solid. 75% yield.  $^1\text{H}$  NMR (500 MHz,  $\text{CDCl}_3$ )  $\delta$  7.81 (d,  $J = 8.3$  Hz, 2H), 7.36 (d,  $J = 8.2$  Hz, 2H), 7.13 (dd,  $J = 10.4, 1.4$  Hz, 1H), 5.77 (d,  $J = 10.4$  Hz, 1H), 4.56 (d,  $J = 15.5$  Hz, 1H), 4.39 – 4.25 (m, 1H), 3.59 (d,  $J = 6.0$  Hz, 1H), 3.48 – 3.38 (m, 1H), 2.46 (s, 3H), 1.82 (s, 3H), 1.76 (s, 3H).  $^{13}\text{C}$  NMR (126 MHz,  $\text{CDCl}_3$ )  $\delta$  198.2, 186.1, 167.7, 150.4, 144.1, 138.1, 133.9, 130.0, 126.9, 125.5, 63.5, 58.0, 52.5, 48.6, 27.3, 21.6, 9.1. HRMS (ESI,  $m/z$ ) calcd for  $\text{C}_{19}\text{H}_{19}\text{NO}_4\text{S}$   $[\text{M}+\text{H}]^+$  358.1108, found 358.1124.  $[\alpha]_{\text{D}}^{16} = 164.3^\circ$  (c 0.10,  $\text{CHCl}_3$ ); >99% ee; Chiral HPLC analysis of the product: Daicel Chiralpak OD-H 250X4.6 mm 5u column; hexane/2-propanol = 80/20, detected at 254 nm, flow rate 1 mL/min, Retention times: 48.0 min (major), 67.0 (minor).

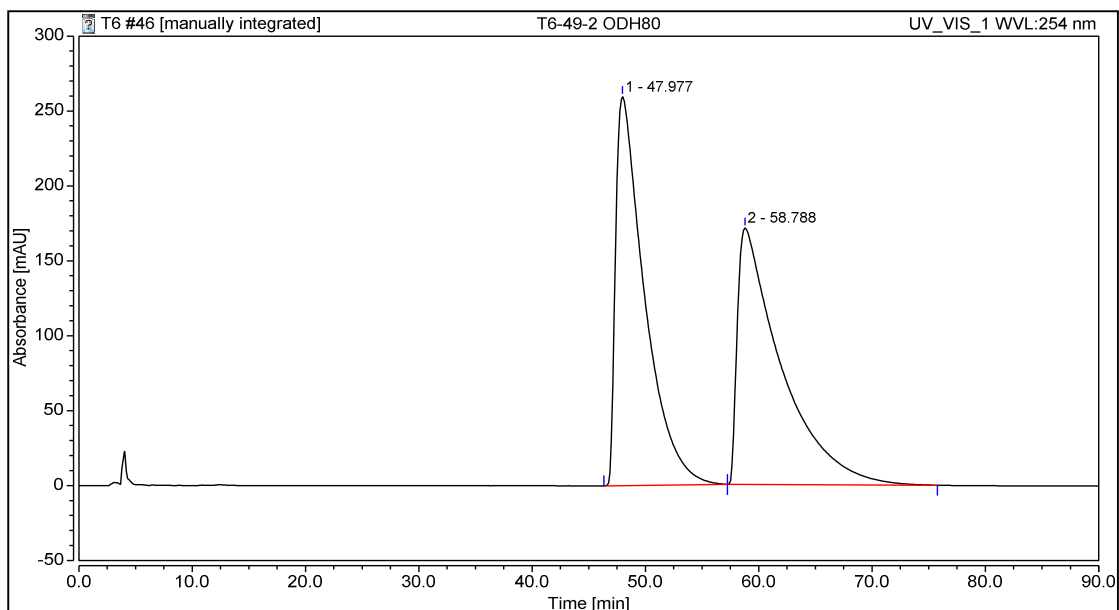

| Integration Results |                       |                 |                |                    |                      |
|---------------------|-----------------------|-----------------|----------------|--------------------|----------------------|
| No.                 | Retention Time<br>min | Area<br>mAU*min | Height<br>mAU  | Relative Area<br>% | Relative Height<br>% |
| 1                   | 47.977                | 765.414         | 259.674        | 50.08              | 60.28                |
| 2                   | 58.788                | 763.053         | 171.137        | 49.92              | 39.72                |
| <b>Total:</b>       |                       | <b>1528.468</b> | <b>430.811</b> | <b>100.00</b>      | <b>100.00</b>        |

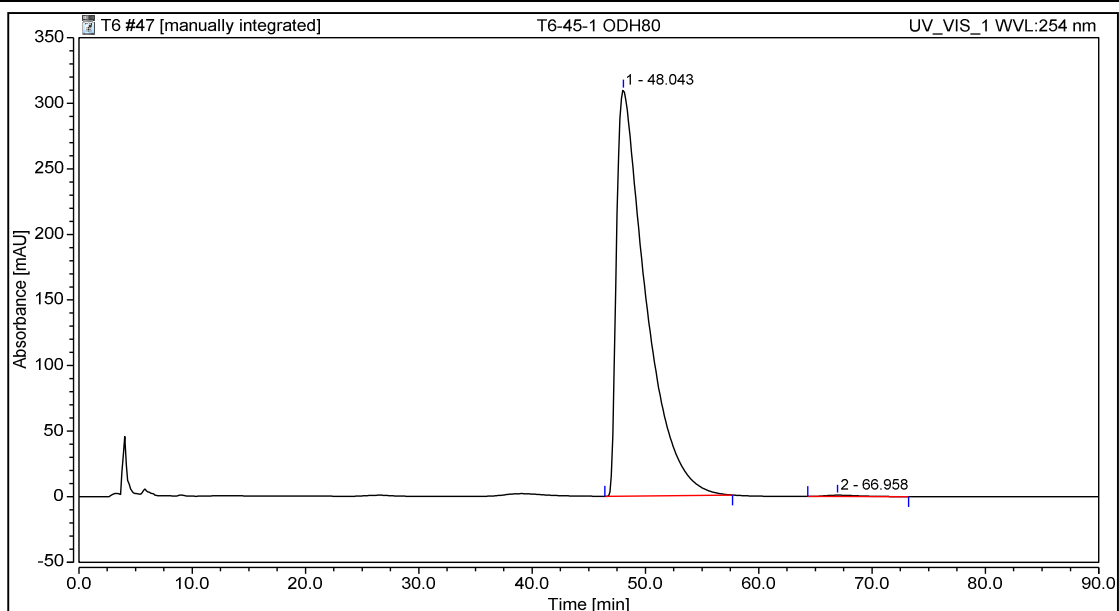

| Integration Results |                       |                 |                |                    |                      |
|---------------------|-----------------------|-----------------|----------------|--------------------|----------------------|
| No.                 | Retention Time<br>min | Area<br>mAU*min | Height<br>mAU  | Relative Area<br>% | Relative Height<br>% |
| 1                   | 48.043                | 929.652         | 309.715        | 99.63              | 99.66                |
| 2                   | 66.958                | 3.435           | 1.048          | 0.37               | 0.34                 |
| <b>Total:</b>       |                       | <b>933.087</b>  | <b>310.763</b> | <b>100.00</b>      | <b>100.00</b>        |



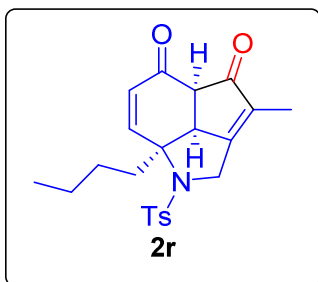

White solid. 96% yield.  $^1\text{H}$  NMR (500 MHz,  $\text{CDCl}_3$ )  $\delta$  7.80 (d,  $J = 8.3$  Hz, 2H), 7.36 (d,  $J = 8.2$  Hz, 2H), 7.06 (dd,  $J = 10.5, 1.3$  Hz, 1H), 5.89 (d,  $J = 10.5$  Hz, 1H), 4.56 (d,  $J = 15.3$  Hz, 1H), 4.25 (d,  $J = 15.3$  Hz, 1H), 3.55 (d,  $J = 6.0$  Hz, 1H), 3.47 – 3.38 (m, 1H), 2.55 – 2.47 (m, 1H), 2.46 (s, 3H), 1.89 (td,  $J = 12.9, 5.1$  Hz, 1H), 1.74 (d,  $J = 8.7$  Hz, 3H), 1.38 – 1.29 (m, 2H), 1.26 (t,  $J = 7.1$  Hz, 1H), 1.22 – 1.08 (m, 2H), 0.86 (t,  $J = 7.3$  Hz, 3H).  $^{13}\text{C}$  NMR (126 MHz,  $\text{CDCl}_3$ )  $\delta$  198.4, 186.5, 167.9, 148.4, 144.1, 138.1, 133.5, 129.9, 127.0, 67.7, 59.3, 50.5, 48.5, 38.8, 26.8, 22.6, 21.6, 13.8, 9.1. >99% ee; Chiral HPLC analysis of the product: Daicel Chiralpak OD-H 250X4.6 mm 5u column; hexane/2-propanol = 80/20, detected at 254 nm, flow rate 1 mL/min, Retention times:

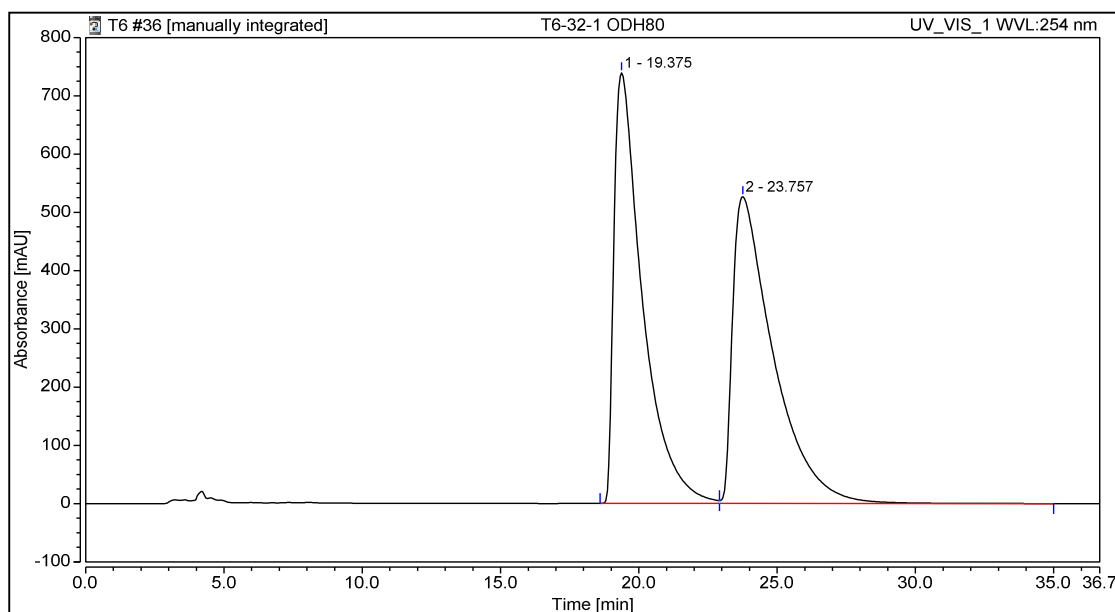

| Integration Results |                       |                 |                 |                    |                      |
|---------------------|-----------------------|-----------------|-----------------|--------------------|----------------------|
| No.                 | Retention Time<br>min | Area<br>mAU*min | Height<br>mAU   | Relative Area<br>% | Relative Height<br>% |
| 1                   | 19.375                | 884.997         | 739.284         | 49.66              | 58.40                |
| 2                   | 23.757                | 897.133         | 526.677         | 50.34              | 41.60                |
| <b>Total:</b>       |                       | <b>1782.130</b> | <b>1265.961</b> | <b>100.00</b>      | <b>100.00</b>        |

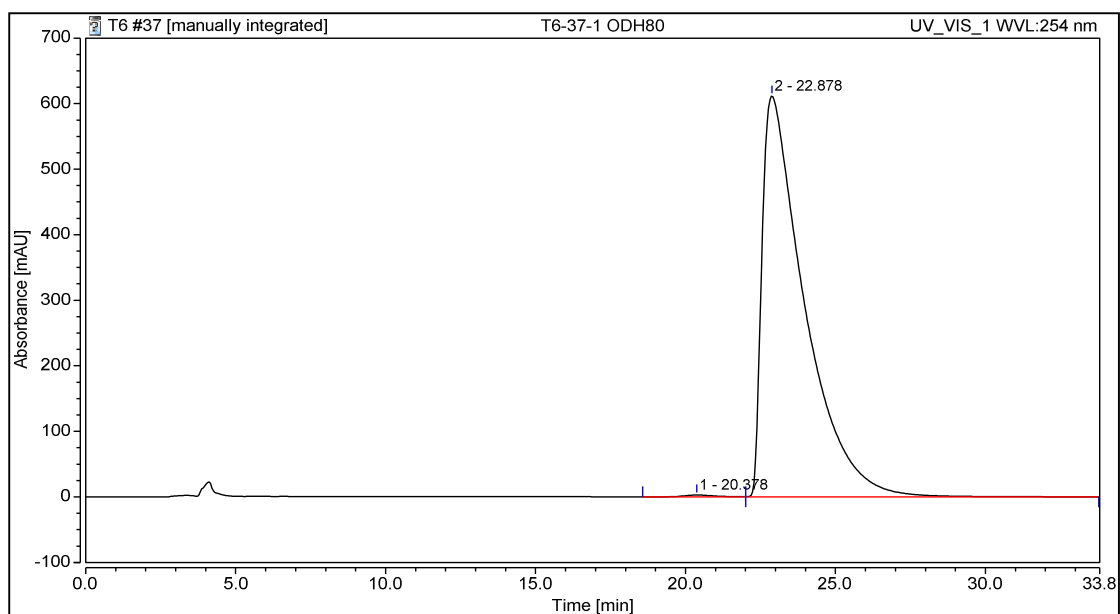

| Integration Results |                       |                 |                |                    |                      |
|---------------------|-----------------------|-----------------|----------------|--------------------|----------------------|
| No.                 | Retention Time<br>min | Area<br>mAU*min | Height<br>mAU  | Relative Area<br>% | Relative Height<br>% |
| 1                   | 20.378                | 3.119           | 2.782          | 0.31               | 0.45                 |
| 2                   | 22.878                | 1000.851        | 611.619        | 99.69              | 99.55                |
| <b>Total:</b>       |                       | <b>1003.970</b> | <b>614.402</b> | <b>100.00</b>      | <b>100.00</b>        |

## 8. NMR and HRMS Spectra of All Compounds

20201125-t5-195

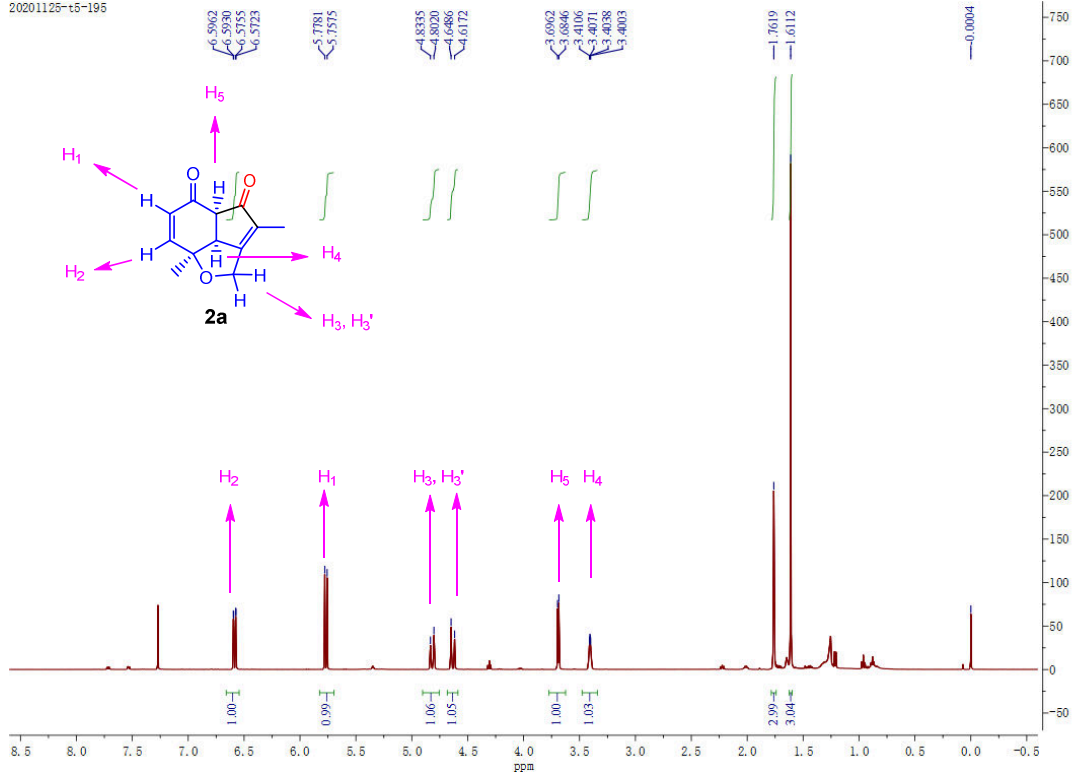

20201126-T5-195

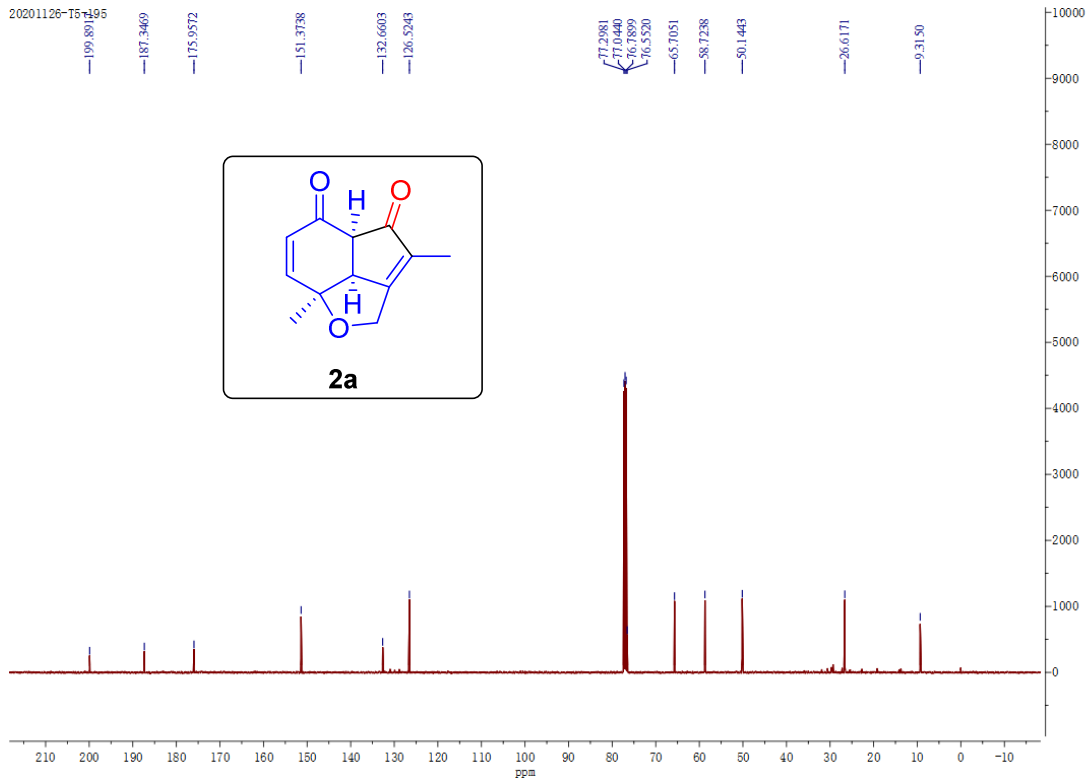

| Sample Name   | T5-186-33   | Position    | P1-F3  | Instrument Name | Instrument 1 | User Name              |                       |
|---------------|-------------|-------------|--------|-----------------|--------------|------------------------|-----------------------|
| Inj Vol       | -1          | InjPosition |        | SampleType      | Sample       | IRM Calibration Status | Success               |
| Data Filename | T5-186-33.d | ACQ Method  | 0103.m | Comment         |              | Acquired Time          | 11/17/2020 8:23:48 AM |

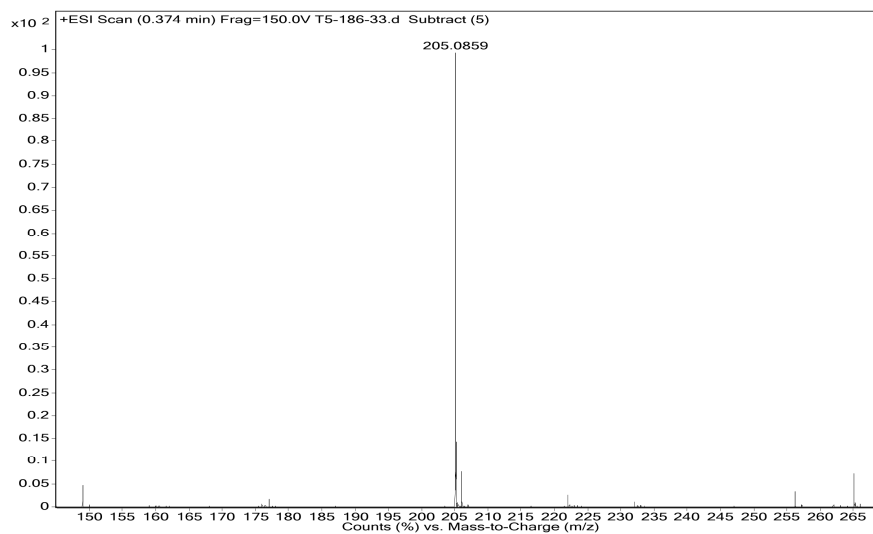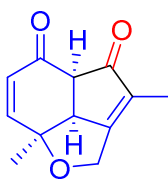

**2a**

Molecular Weight: 204.22 Chemical Formula:  $C_{12}H_{12}O_3$

Exact Mass: 204.0786

Molecular Weight: 204.2250

m/z: 204.0786 (100.0%), 205.0820 (13.0%)

HRMS (ESI, m/z) calcd for  $C_{12}H_{12}O_3$   $[M+H]^+$  205.0859, found 205.0859.

T6-17-1

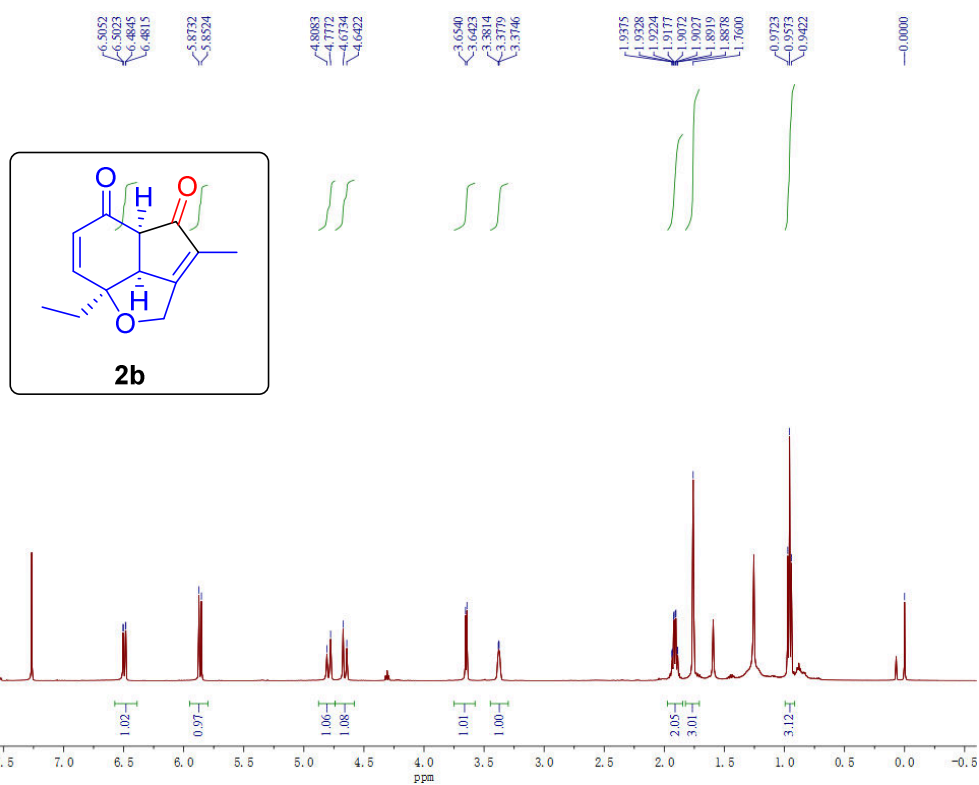

T6-17-1

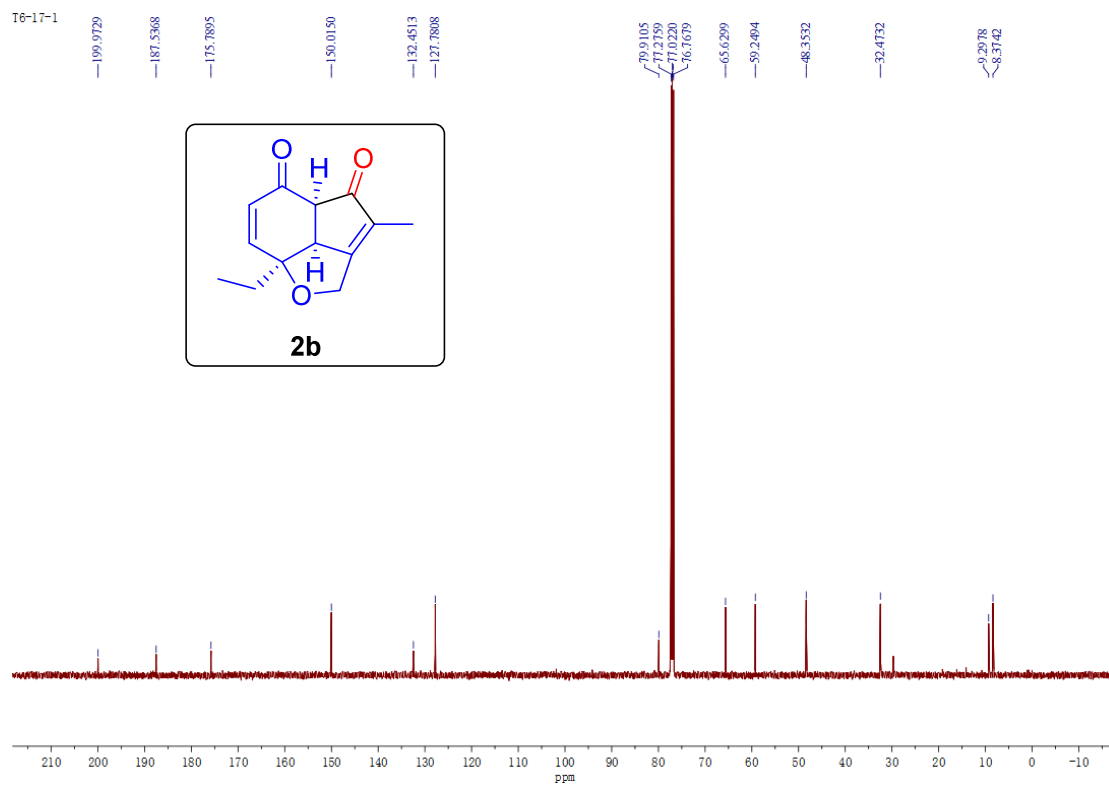

## Display Report

### Analysis Info

Analysis Name D:\Data\fenglei\T6-19-1\_RA1\_01\_4859.d  
Method 1225-1.m  
Sample Name T6-19-1  
Comment

Acquisition Date 4/28/2021 3:28:51 PM

Operator Demo User  
Instrument impact II 1825265.10256

### Acquisition Parameter

|             |            |                      |          |                  |           |
|-------------|------------|----------------------|----------|------------------|-----------|
| Source Type | ESI        | Ion Polarity         | Positive | Set Nebulizer    | 0.4 Bar   |
| Focus       | Not active | Set Capillary        | 2600 V   | Set Dry Heater   | 180 °C    |
| Scan Begin  | 50 m/z     | Set End Plate Offset | -500 V   | Set Dry Gas      | 4.0 l/min |
| Scan End    | 1300 m/z   | Set Charging Voltage | 2000 V   | Set Divert Valve | Source    |
|             |            | Set Corona           | 0 nA     | Set APCI Heater  | 0 °C      |

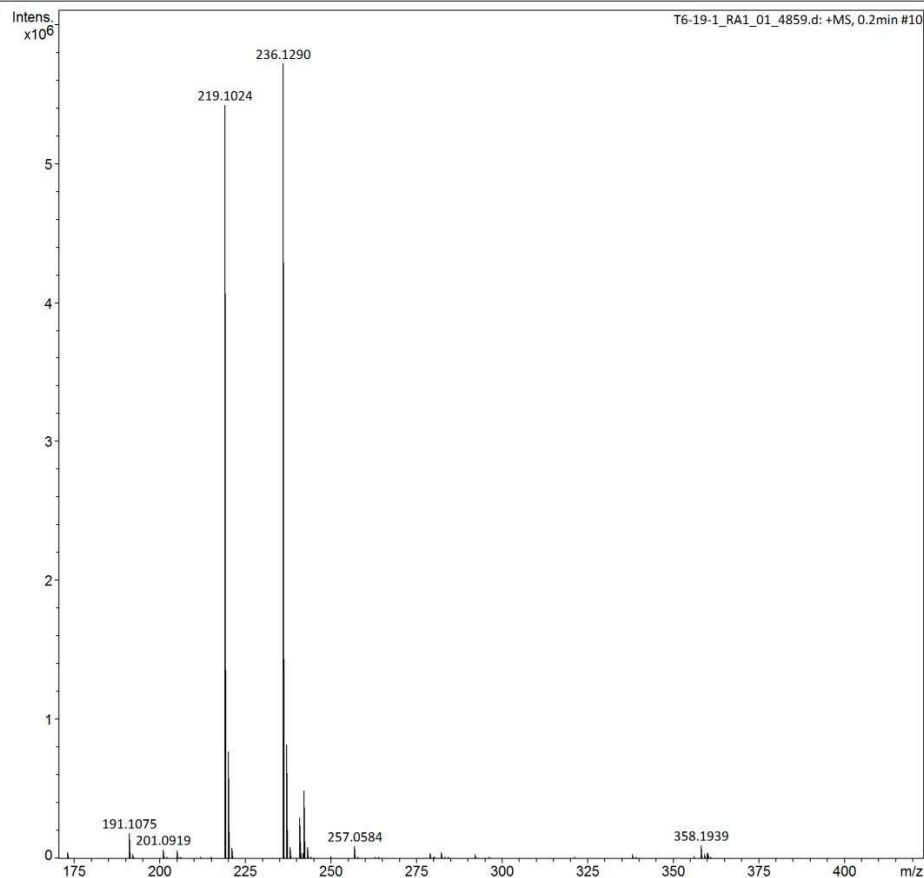

T6-19-1\_RA1\_01\_4859.d

Bruker Compass DataAnalysis 4.4

printed: 4/28/2021 3:54:37 PM

by: demo

Page 1 of 1

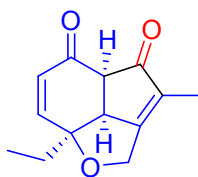

**2b**

Chemical Formula: C<sub>13</sub>H<sub>14</sub>O<sub>3</sub>

Exact Mass: 218.0943

Molecular Weight: 218.2520

m/z: 218.0943 (100.0%), 219.0976 (14.1%)

HRMS (ESI, m/z) calcd for C<sub>13</sub>H<sub>14</sub>O<sub>3</sub> [M+H]<sup>+</sup> 219.1016, found 219.1024.

T6-17-2

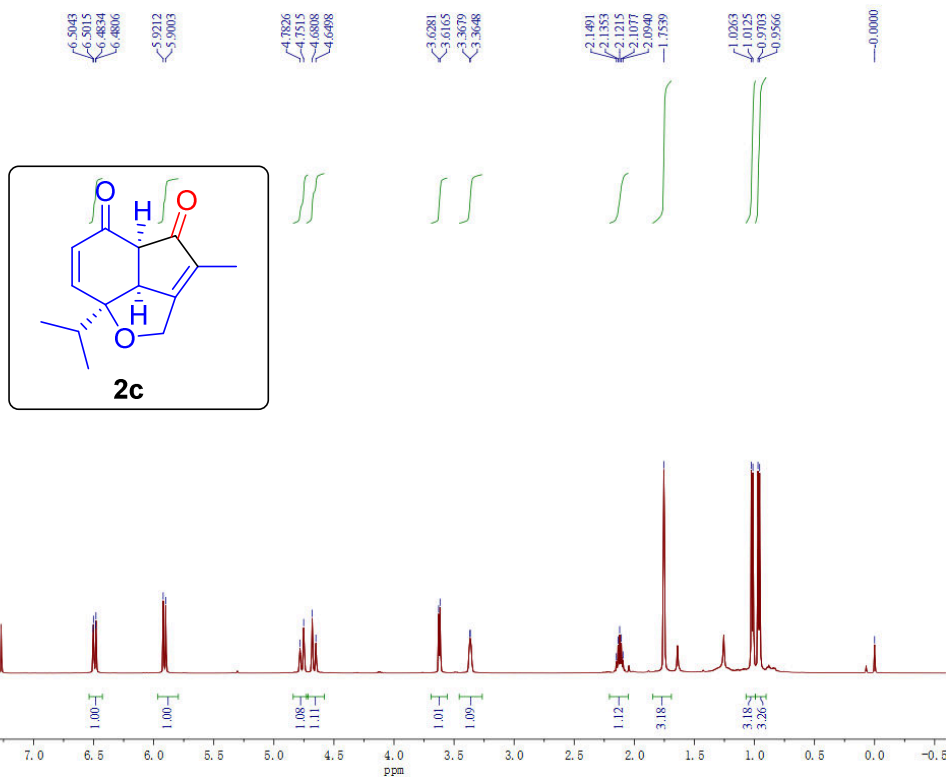

T6-17-2

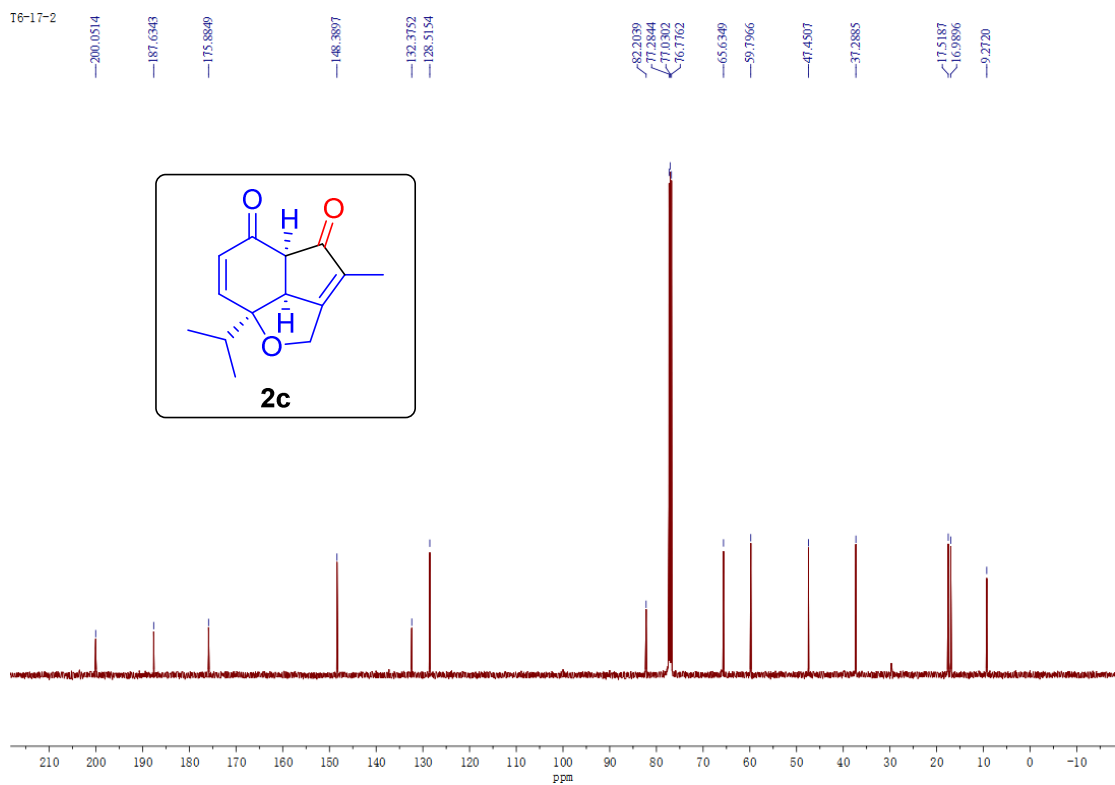

## Display Report

### Analysis Info

Analysis Name D:\Data\engle\T6-20-1\_RB1\_01\_4860.d  
Method 1225-1.m  
Sample Name T6-20-1  
Comment

Acquisition Date 4/28/2021 3:31:16 PM

Operator Demo User  
Instrument impact II 1825265.10256

### Acquisition Parameter

|             |            |                      |          |                  |           |
|-------------|------------|----------------------|----------|------------------|-----------|
| Source Type | ESI        | Ion Polarity         | Positive | Set Nebulizer    | 0.4 Bar   |
| Focus       | Not active | Set Capillary        | 2600 V   | Set Dry Heater   | 180 °C    |
| Scan Begin  | 50 m/z     | Set End Plate Offset | -500 V   | Set Dry Gas      | 4.0 l/min |
| Scan End    | 1300 m/z   | Set Charging Voltage | 2000 V   | Set Divert Valve | Source    |
|             |            | Set Corona           | 0 nA     | Set APCI Heater  | 0 °C      |

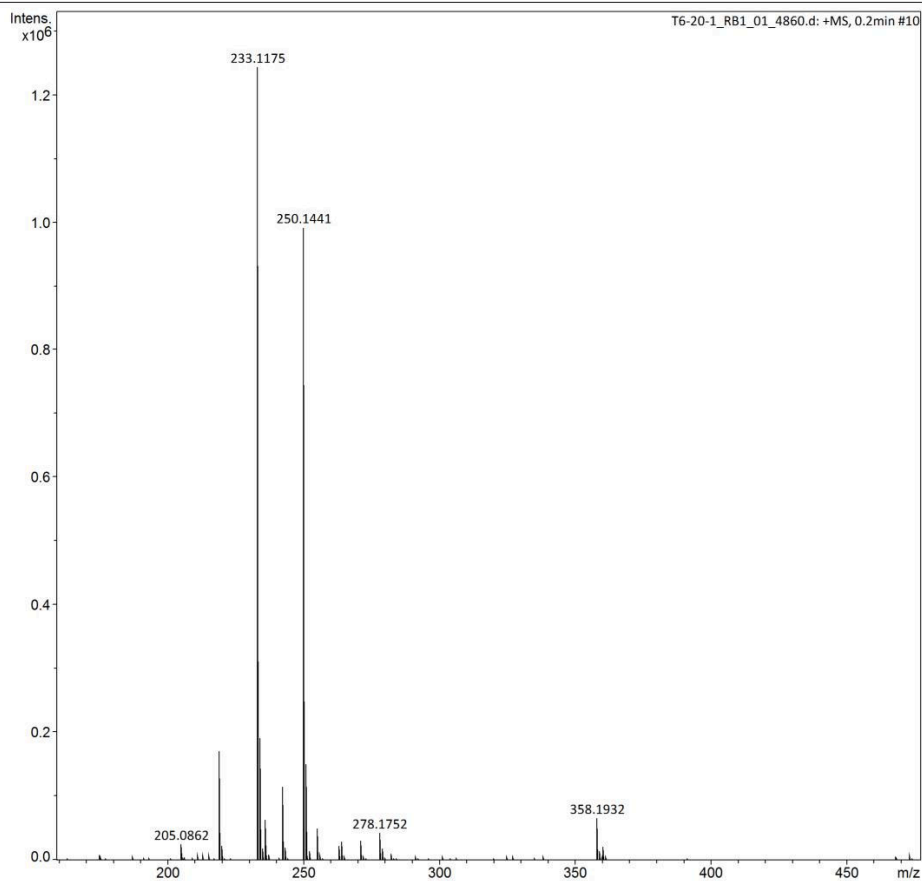

T6-20-1\_RB1\_01\_4860.d

Bruker Compass DataAnalysis 4.4

printed: 4/28/2021 3:56:57 PM

by: demo

Page 1 of 1

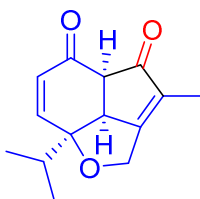

**2c**

Chemical Formula: C<sub>14</sub>H<sub>16</sub>O<sub>3</sub>

Exact Mass: 232.1099

Molecular Weight: 232.2790

m/z: 232.1099 (100.0%), 233.1133 (15.1%), 234.1167 (1.1%)

HRMS (ESI, m/z) calcd for C<sub>14</sub>H<sub>16</sub>O<sub>3</sub> [M+H]<sup>+</sup> 233.1172, found 233.1175.



T6-36-1

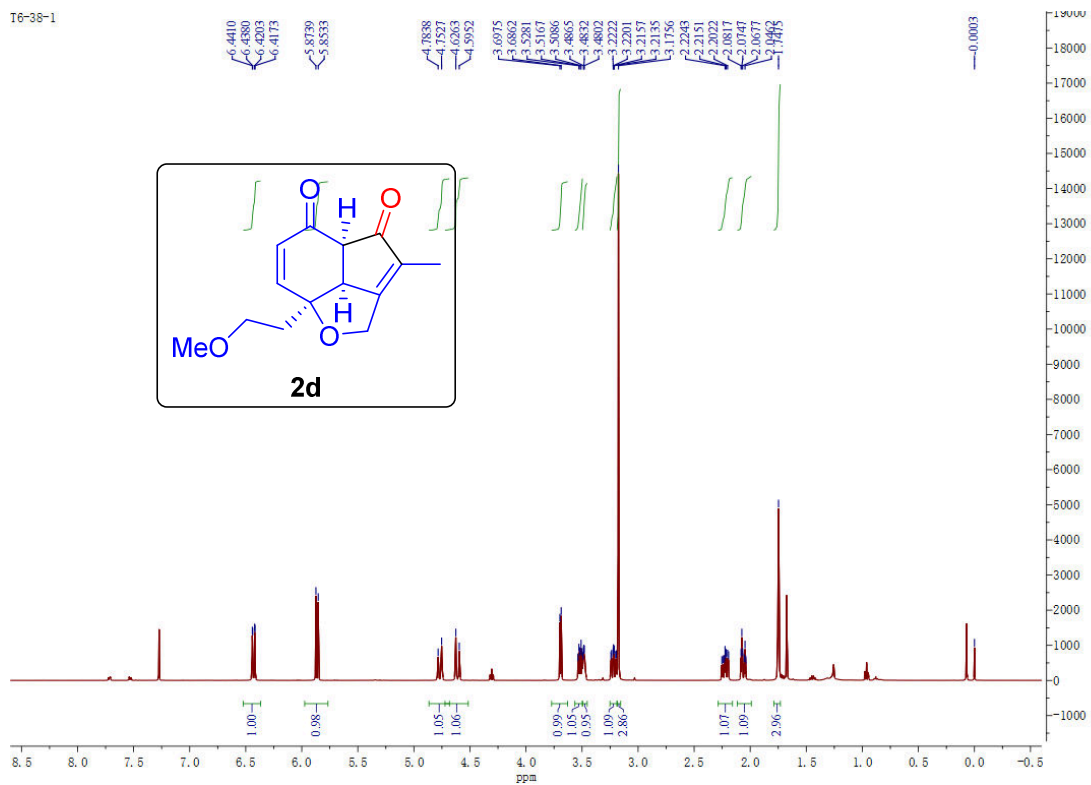

T6-36-1

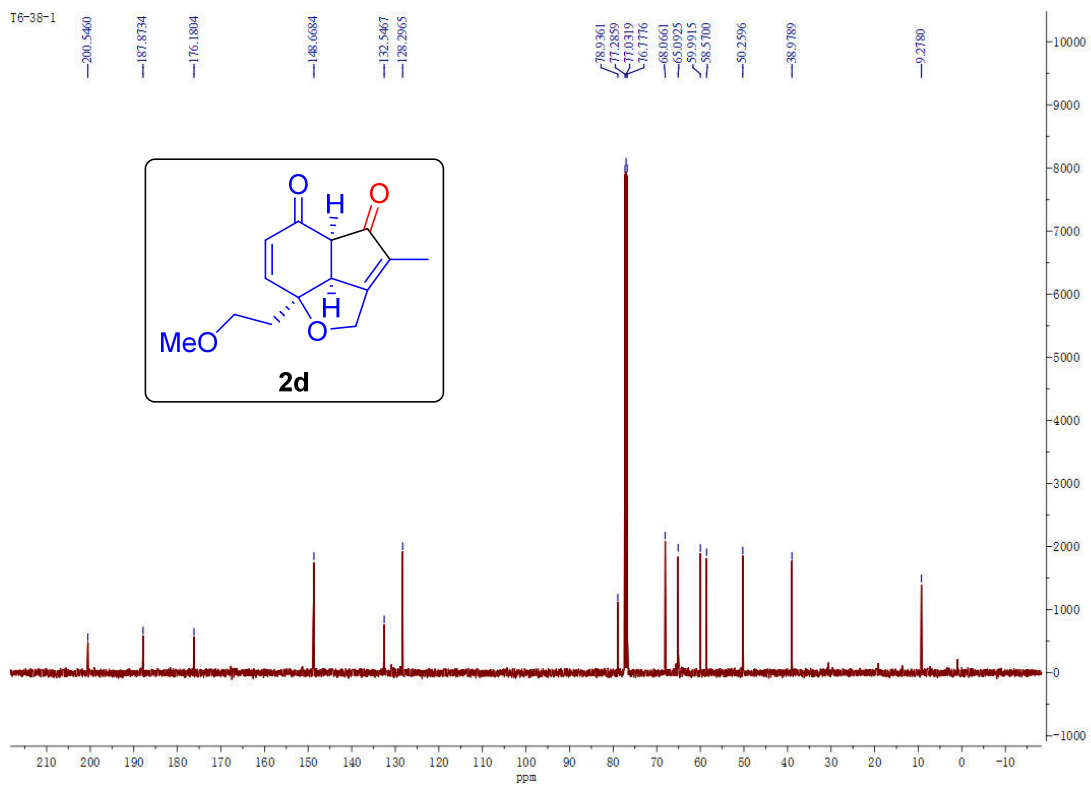

## Display Report

### Analysis Info

Analysis Name D:\Data\fenglei\TQ-1\_GB3\_01\_6569.d  
Method 1225-1.m  
Sample Name TQ-1  
Comment

Acquisition Date 6/18/2021 5:01:11 PM

Operator Demo User  
Instrument impact II 1825265.10256

### Acquisition Parameter

|             |            |                      |          |                  |           |
|-------------|------------|----------------------|----------|------------------|-----------|
| Source Type | ESI        | Ion Polarity         | Positive | Set Nebulizer    | 0.4 Bar   |
| Focus       | Not active | Set Capillary        | 2600 V   | Set Dry Heater   | 180 °C    |
| Scan Begin  | 50 m/z     | Set End Plate Offset | -500 V   | Set Dry Gas      | 4.0 l/min |
| Scan End    | 1600 m/z   | Set Charging Voltage | 2000 V   | Set Divert Valve | Source    |
|             |            | Set Corona           | 0 nA     | Set APCI Heater  | 0 °C      |

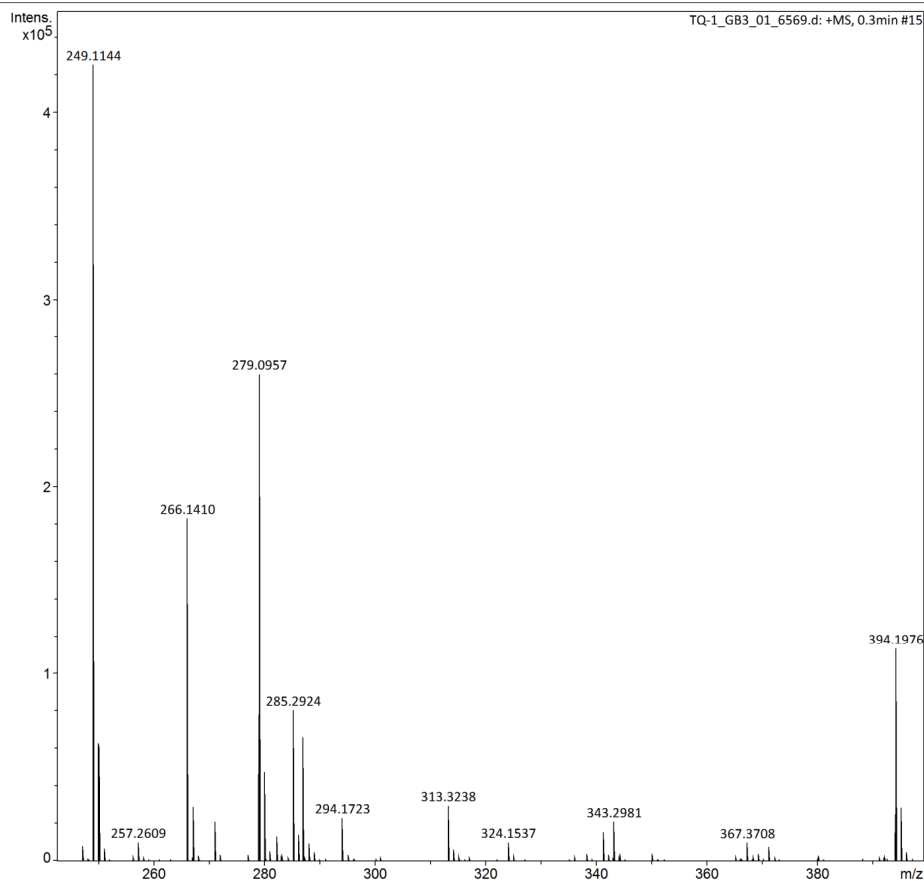

TQ-1\_GB3\_01\_6569.d

Bruker Compass DataAnalysis 4.4

printed: 6/18/2021 5:11:57 PM

by: demo

Page 1 of 1

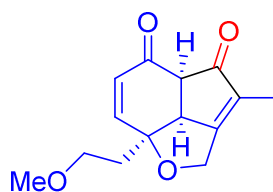

**2d**

Chemical Formula: C<sub>14</sub>H<sub>16</sub>O<sub>4</sub>

Exact Mass: 248.1049

Molecular Weight: 248.2780

m/z: 248.1049 (100.0%), 249.1082 (15.1%), 250.1116 (1.1%)

HRMS (ESI, m/z) calcd for C<sub>14</sub>H<sub>16</sub>O<sub>4</sub> [M+H]<sup>+</sup> 249.1121, found 249.1144.

T6-36-2

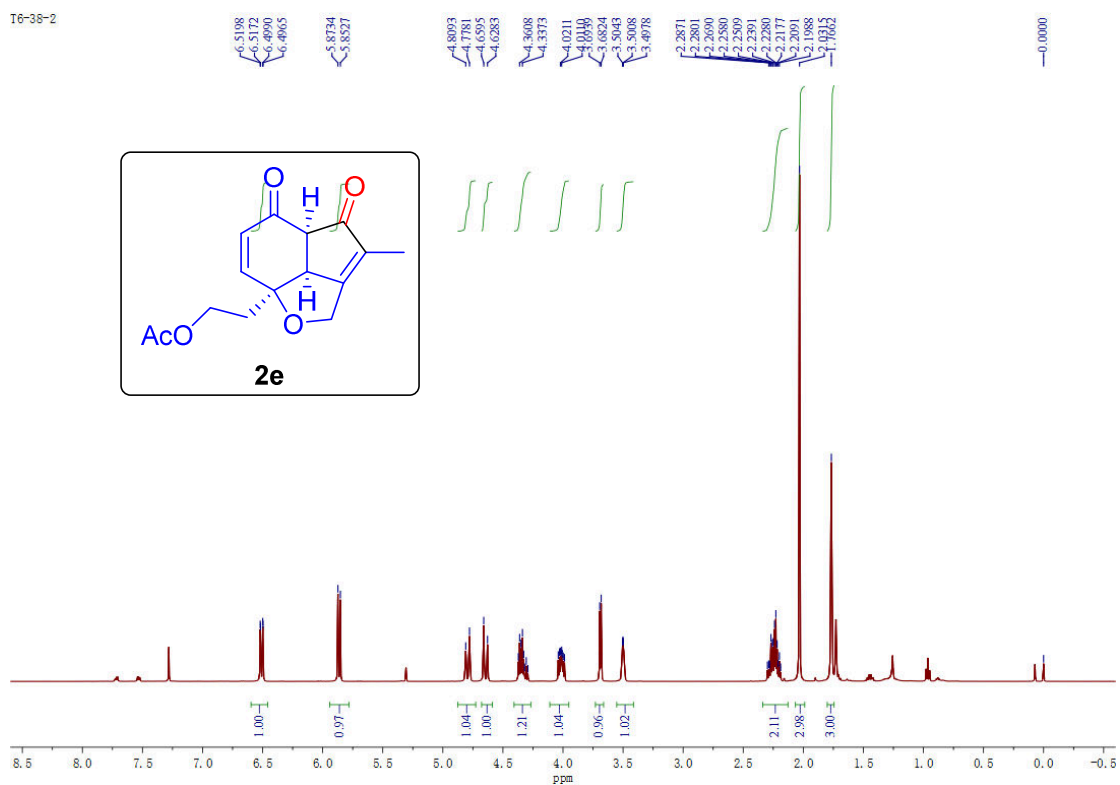

T6-36-2

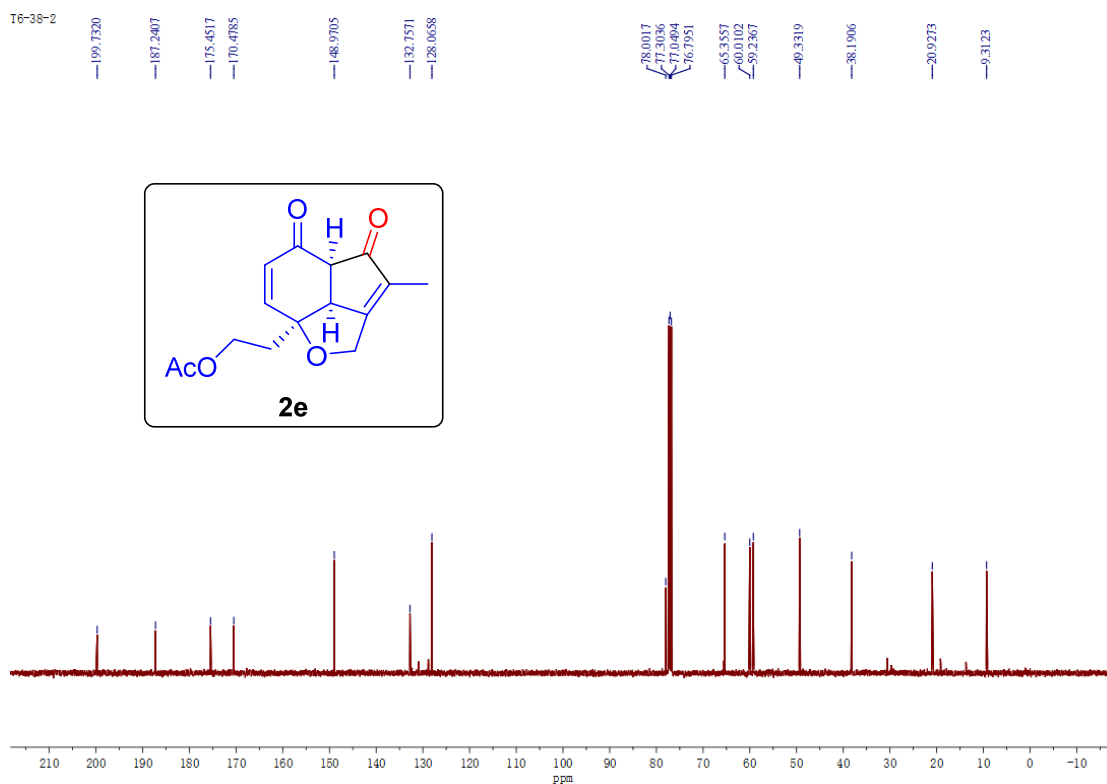

Method 1225-1.m  
Sample Name TQ-2  
Comment

Operator Demo User  
Instrument Impact II 1625265.10256

**Acquisition Parameter**

|             |            |                      |          |                  |           |
|-------------|------------|----------------------|----------|------------------|-----------|
| Source Type | ESI        | Ion Polarity         | Positive | Set Nebulizer    | 0.4 Bar   |
| Focus       | Not active | Set Capillary        | 2600 V   | Set Dry Heater   | 180 °C    |
| Scan Begin  | 50 m/z     | Set End Plate Offset | -500 V   | Set Dry Gas      | 4.0 l/min |
| Scan End    | 1600 m/z   | Set Charging Voltage | 2000 V   | Set Divert Valve | Source    |
|             |            | Set Corona           | 0 nA     | Set APCI Heater  | 0 °C      |

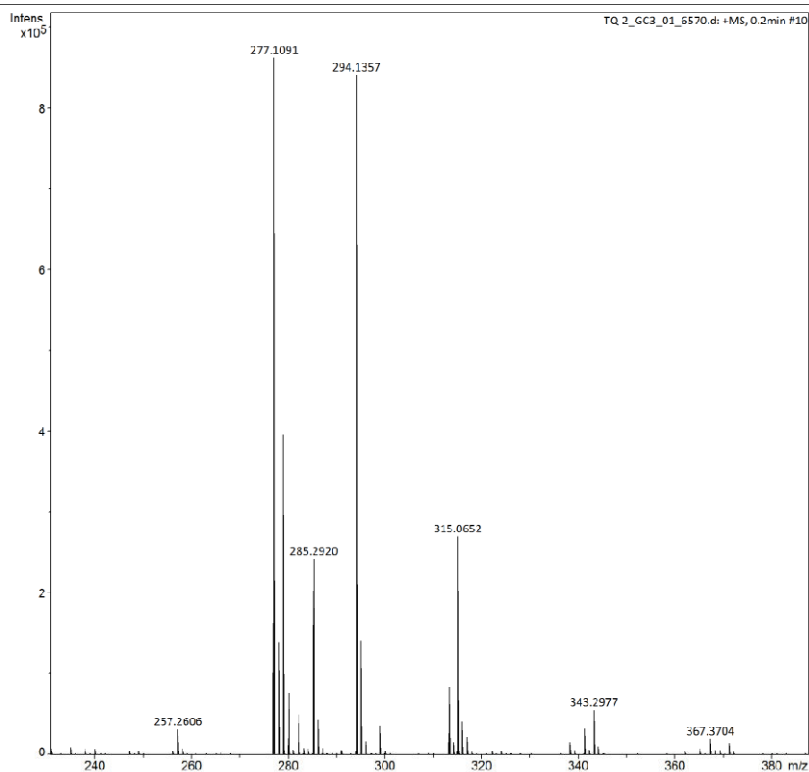

TQ-2\_GC3\_01\_6570.d  
Bruker Compass DataAnalysis 4.4 printed: 6/18/2021 5:13:28 PM by: demo Page 1 of 1

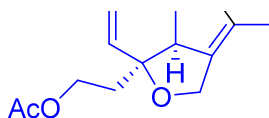

**2e**

Chemical Formula: C<sub>15</sub>H<sub>16</sub>O<sub>5</sub>

Exact Mass: 276.0998

Molecular Weight: 276.2880

m/z: 276.0998 (100.0%), 277.1031 (16.2%), 278.1065 (1.2%),  
278.1040 (1.0%)

HRMS (ESI, m/z) calcd for C<sub>15</sub>H<sub>16</sub>O<sub>5</sub> [M+H]<sup>+</sup> 277.1071, found 277.1091.

XZH-T6-57-2-210816. 1. fid  
XZH-T6-57-2-210816

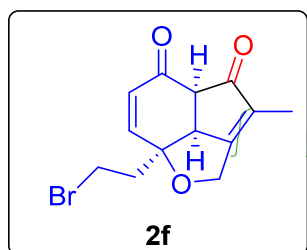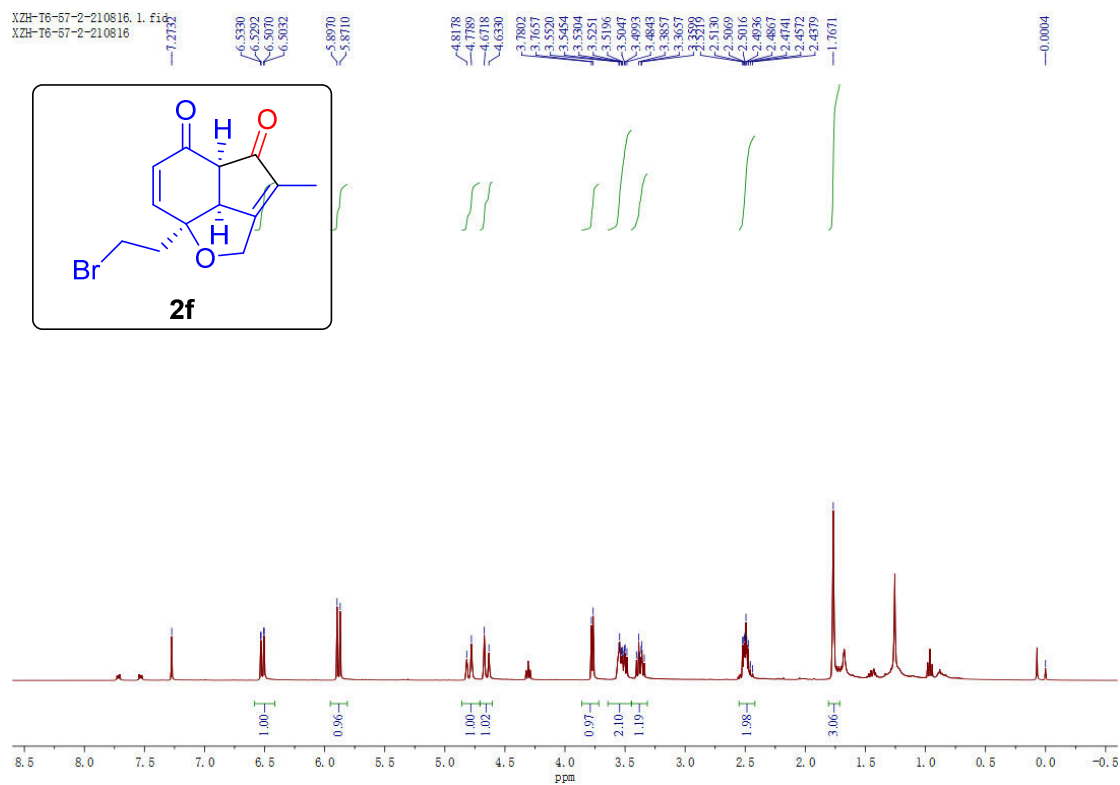

XZH-T6-57-2-210816. 2. fid  
XZH-T6-57-2-210816

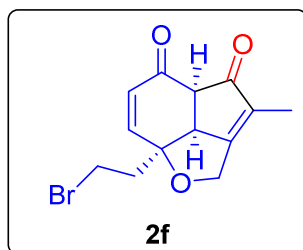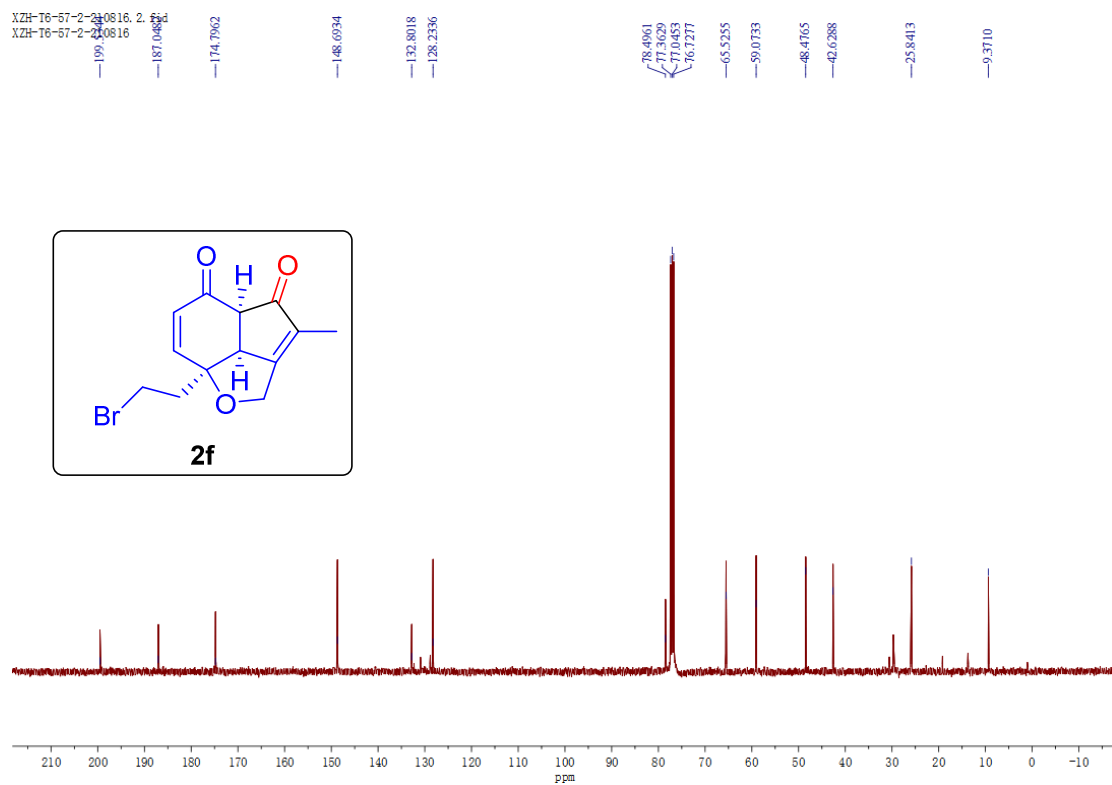

## Display Report

### Analysis Info

Analysis Name D:\Data\engle\T6 74 1\_GB6\_01\_9375.d  
Method 1225-1.m  
Sample Name T6-74-1  
Comment

Acquisition Date 8/26/2021 3:50:06 PM

Operator Demo User  
Instrument impact II 1825295.10250

### Acquisition Parameter

|             |            |                      |          |                  |           |
|-------------|------------|----------------------|----------|------------------|-----------|
| Source Type | ESI        | Ion Polarity         | Positive | Set Nebulizer    | 0.4 Bar   |
| Focus       | Not active | Set Capillary        | 2800 V   | Set Dry Heater   | 180 °C    |
| Scan Begin  | 63 m/z     | Set End Plate Offset | -500 V   | Set Dry Gas      | 4.0 l/min |
| Scan End    | 3300 m/z   | Set Charging Voltage | 2700 V   | Set Divert Valve | Source    |
|             |            | Set Corona           | 0 nA     | Set APC Heater   | 0 °C      |

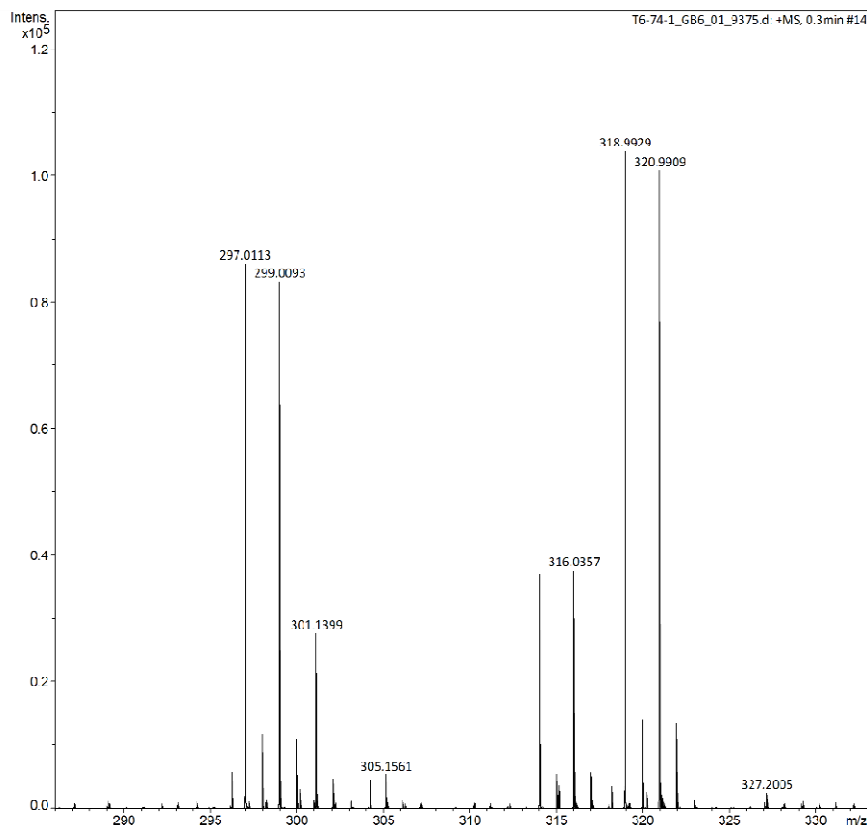

T6-74-1\_GB6\_01\_9375.d  
Bruker Compass DataAnalysis 4.4

Printed: 8/26/2021 3:52:53 PM

by: demo

Page 1 of 1

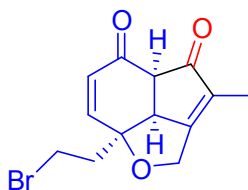

**2f**

Chemical Formula: C<sub>13</sub>H<sub>13</sub>BrO<sub>3</sub>

Exact Mass: 296.0048

Molecular Weight: 297.1480

m/z: 296.0048 (100.0%), 298.0028 (97.3%), 297.0082 (14.1%),  
299.0061 (13.7%)

HRMS (ESI, m/z) calcd for C<sub>13</sub>H<sub>13</sub>BrO<sub>3</sub> [M+H]<sup>+</sup> 297.0121, found 297.0113.

T6-51-1

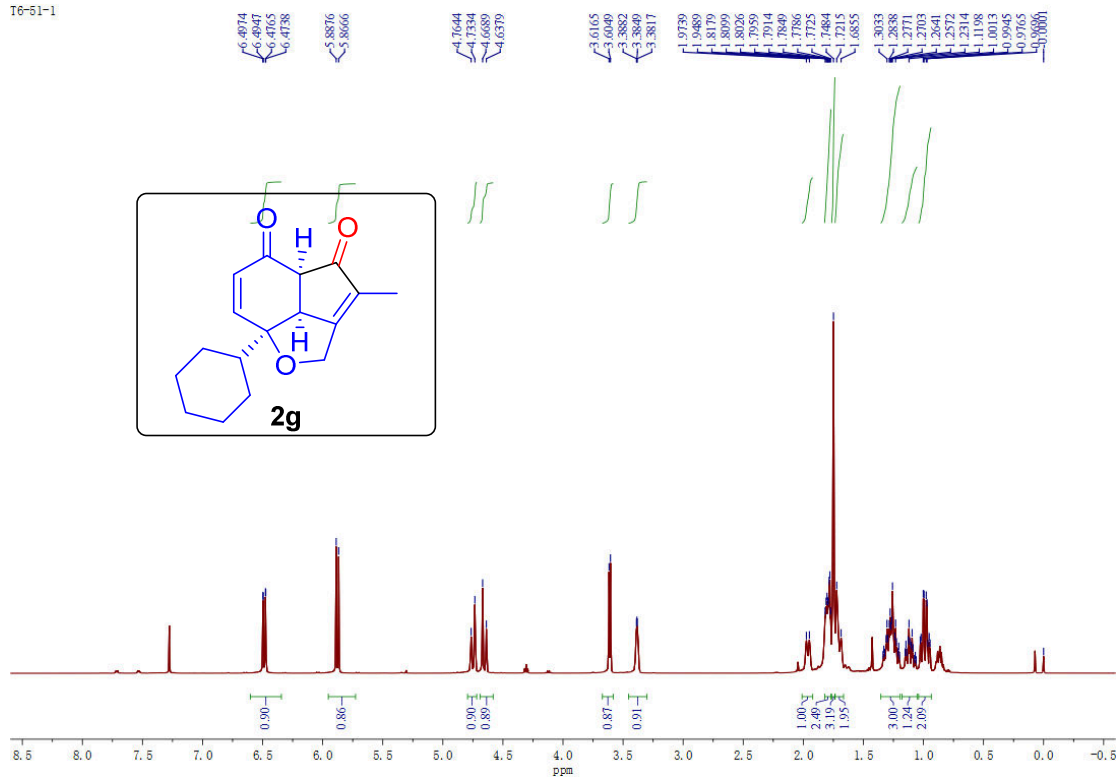

T6-51-1

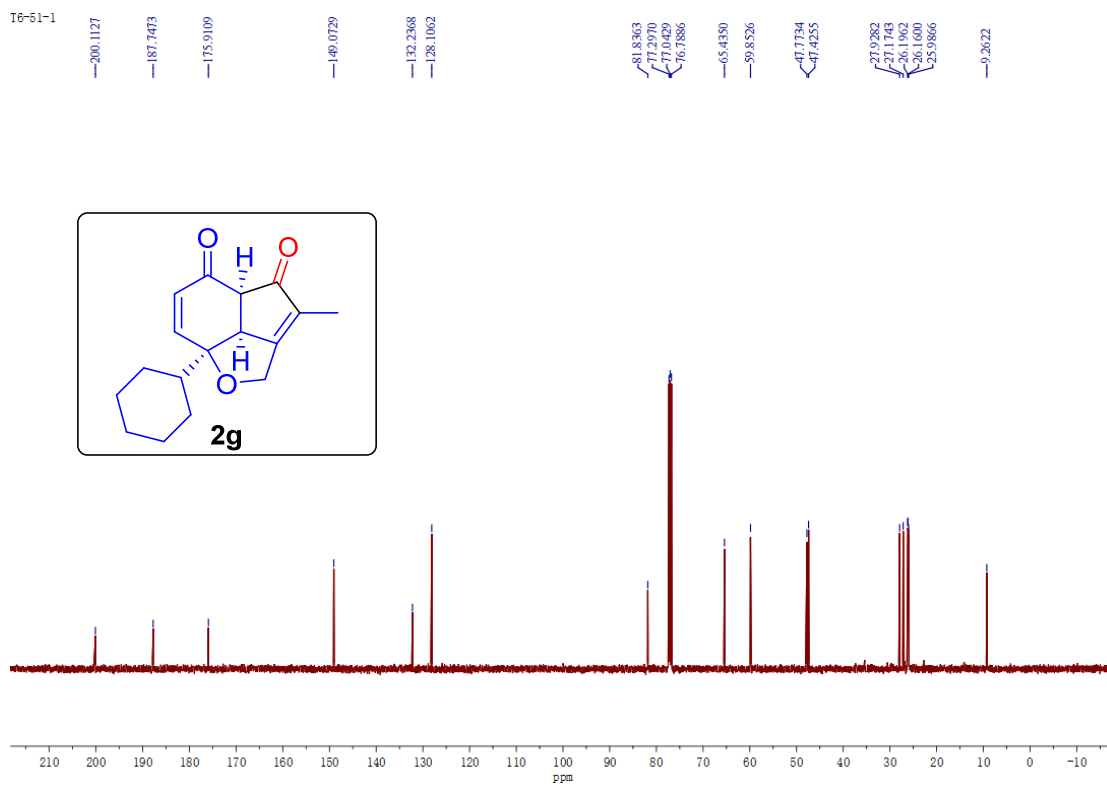

Method 1225-1.m Operator Demo User  
Sample Name TQ Instrument impact II 1825265.10256  
Comment

**Acquisition Parameter**

|             |            |                      |          |                  |           |
|-------------|------------|----------------------|----------|------------------|-----------|
| Source Type | ESI        | Ion Polarity         | Positive | Set Nebulizer    | 0.4 Bar   |
| Focus       | Not active | Set Capillary        | 2600 V   | Set Dry Heater   | 180 °C    |
| Scan Begin  | 50 m/z     | Set End Plate Offset | -500 V   | Set Dry Gas      | 4.0 l/min |
| Scan End    | 1600 m/z   | Set Charging Voltage | 2000 V   | Set Divert Valve | Source    |
|             |            | Set Corona           | 0 nA     | Set APCI Heater  | 0 °C      |

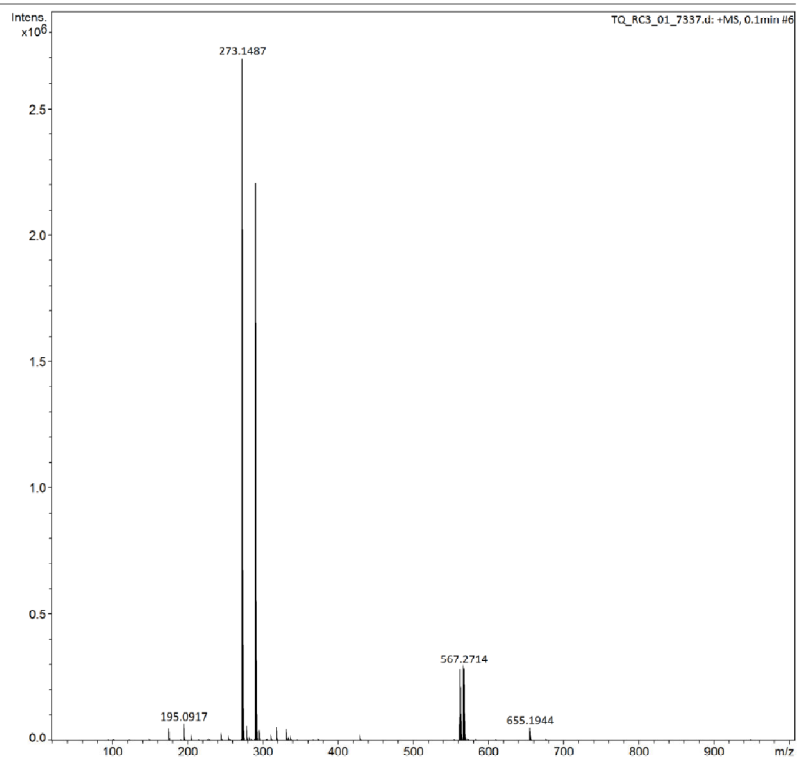

TQ\_RC3\_01\_7337.d  
Bruker Compass DataAnalysis 4.4 printed: 7/9/2021 4:40:58 PM by: demo Page 1 of 1

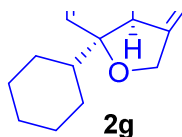

Chemical Formula: C<sub>17</sub>H<sub>20</sub>O<sub>3</sub>

Exact Mass: 272.1412

Molecular Weight: 272.3440

m/z: 272.1412 (100.0%), 273.1446 (18.4%), 274.1480 (1.6%)

HRMS (ESI, m/z) calcd for C<sub>17</sub>H<sub>20</sub>O<sub>3</sub> [M+H]<sup>+</sup> 273.1485, found 273.1487.



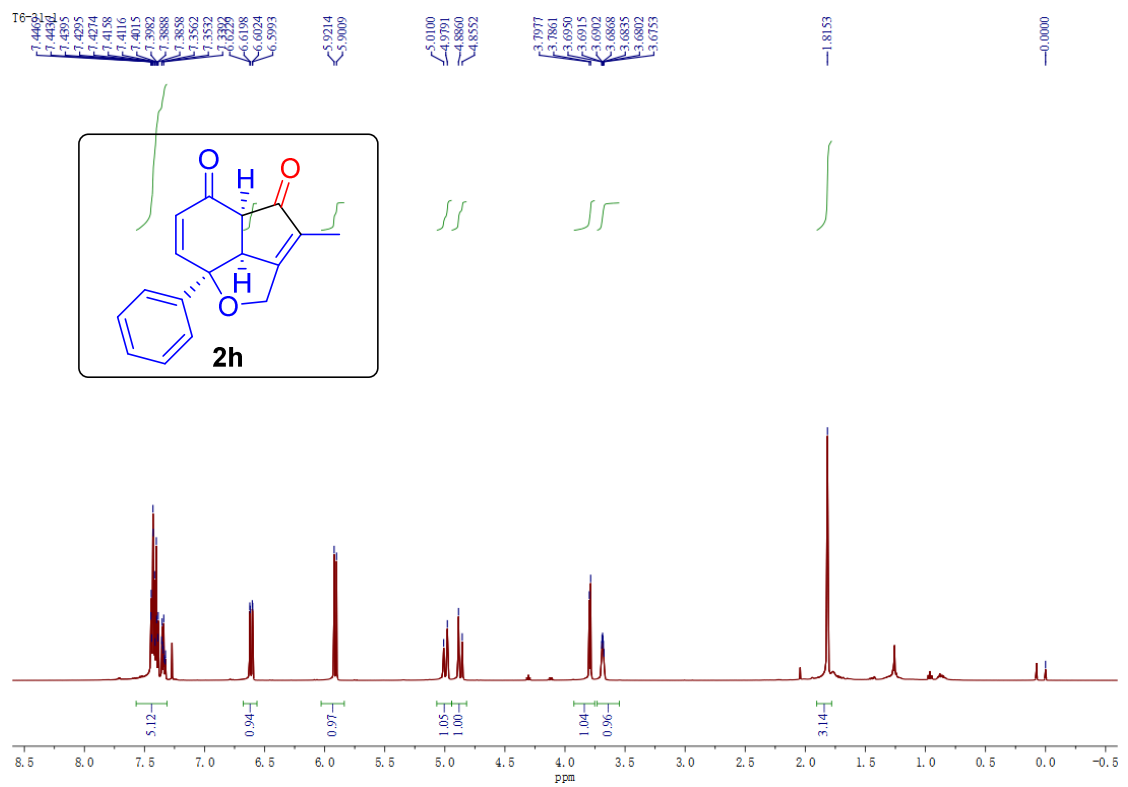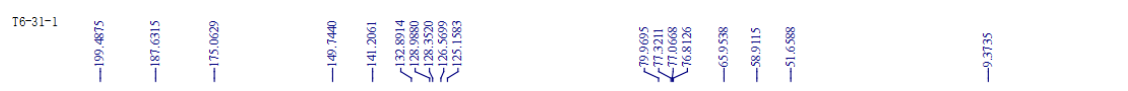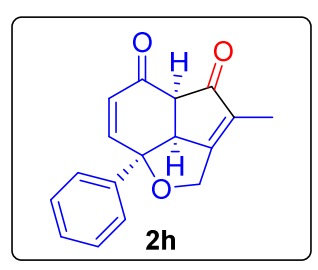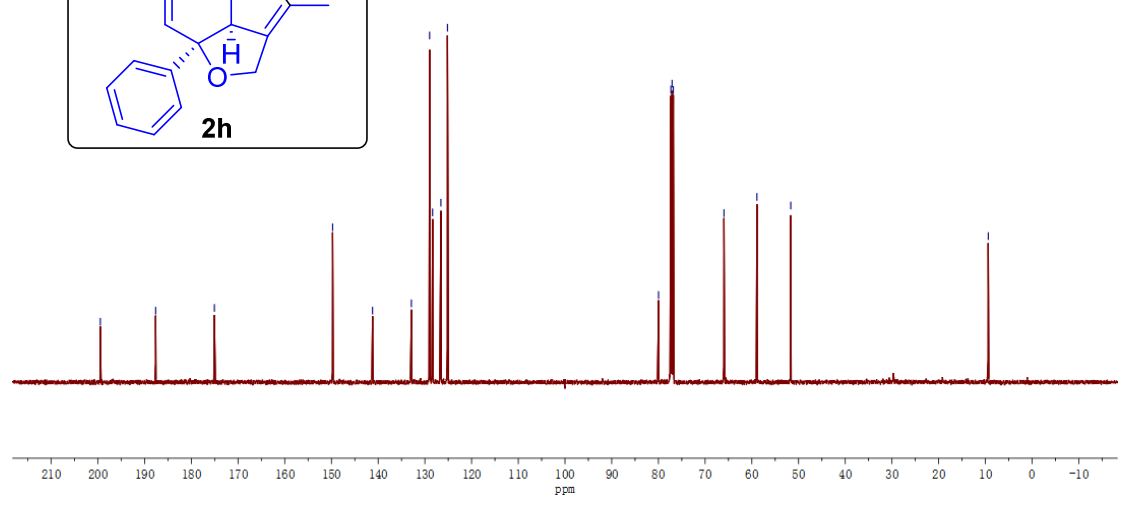

Method 1225-1.m Operator Demo User  
Sample Name T6-31-2 Instrument impact II 1825265.10256  
Comment

**Acquisition Parameter**

|             |            |                      |          |                  |           |
|-------------|------------|----------------------|----------|------------------|-----------|
| Source Type | ESI        | Ion Polarity         | Positive | Set Nebulizer    | 0.4 Bar   |
| Focus       | Not active | Set Capillary        | 2600 V   | Set Dry Heater   | 180 °C    |
| Scan Begin  | 50 m/z     | Set End Plate Offset | -500 V   | Set Dry Gas      | 4.0 l/min |
| Scan End    | 1300 m/z   | Set Charging Voltage | 2000 V   | Set Divert Valve | Source    |
|             |            | Set Corona           | 0 nA     | Set APCI Heater  | 0 °C      |

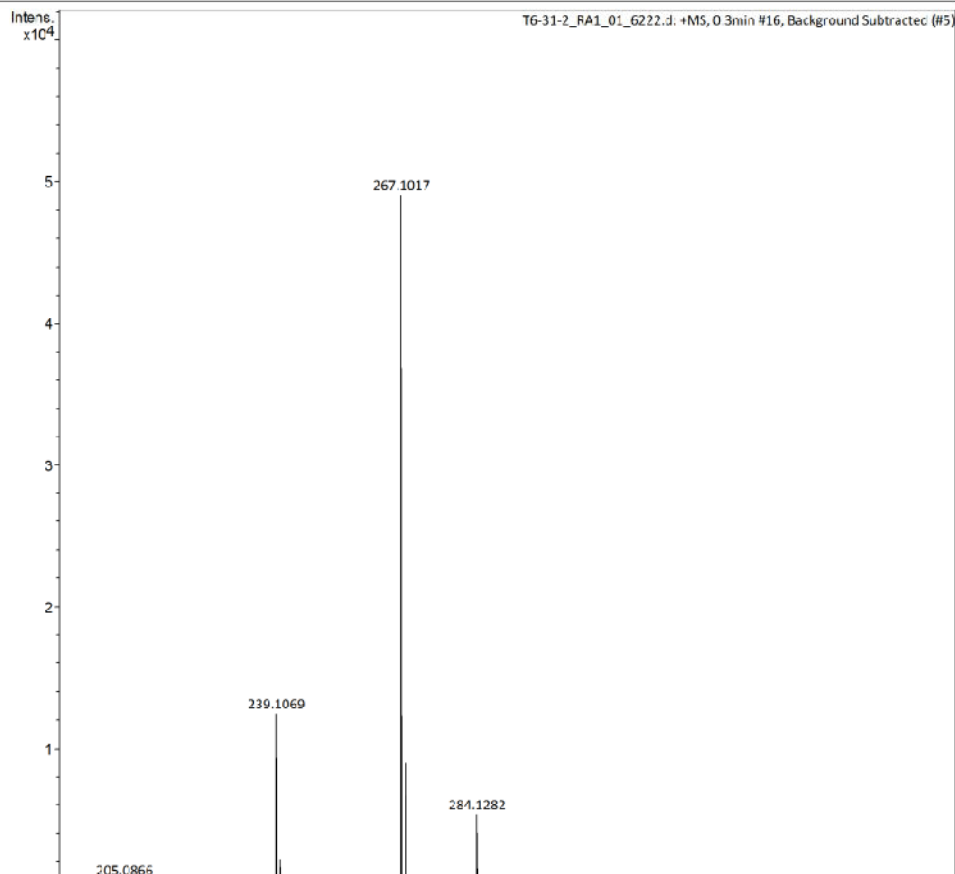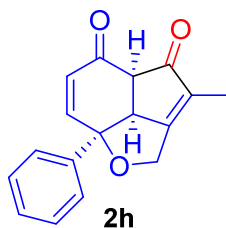

Chemical Formula: C<sub>17</sub>H<sub>14</sub>O<sub>3</sub>

Exact Mass: 266.0943

Molecular Weight: 266.2960

m/z: 266.0943 (100.0%), 267.0976 (18.4%), 268.1010 (1.6%)

HRMS (ESI, m/z) calcd for C<sub>17</sub>H<sub>14</sub>O<sub>3</sub> [M+H]<sup>+</sup> 267.1016, found 267.1017.

C1-47-2

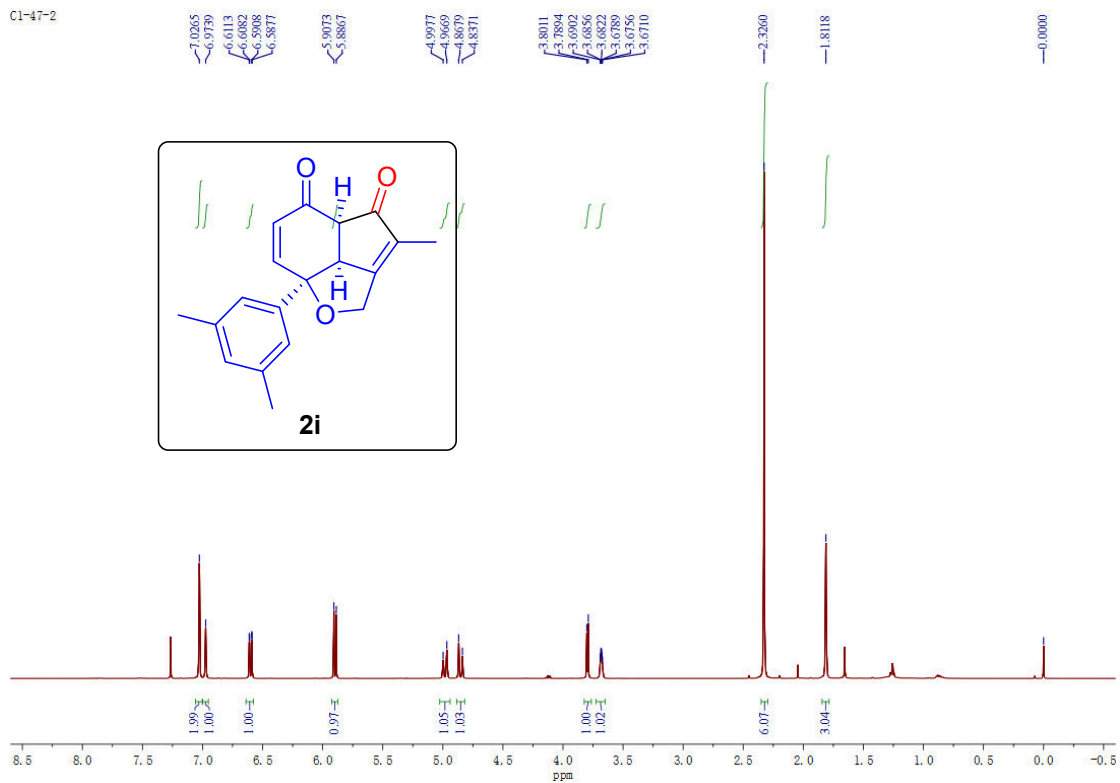

C1-47-2

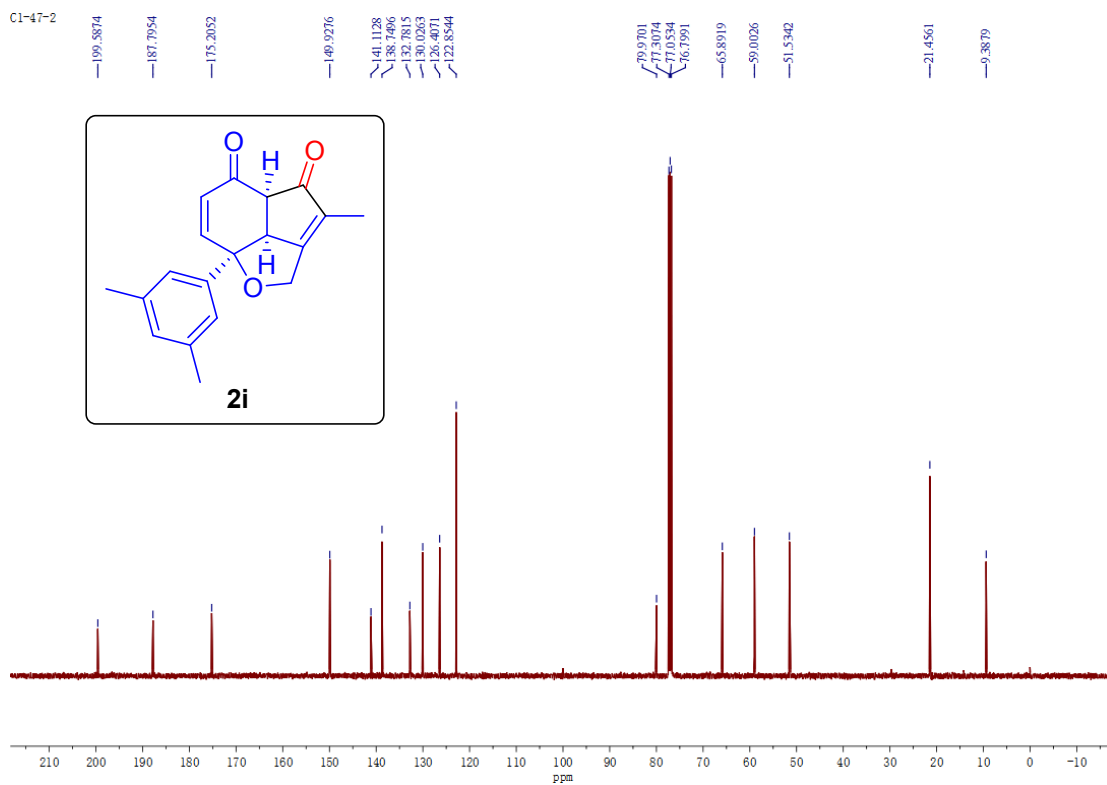

Sample Name CD-3  
Instrument impact II  
1825265.10256

Acquisition Parameter

|             |            |                      |          |                  |           |
|-------------|------------|----------------------|----------|------------------|-----------|
| Source Type | ESI        | Ion Polarity         | Positive | Set Nebulizer    | 0.4 Bar   |
| Focus       | Not active | Set Capillary        | 2600 V   | Set Dry Heater   | 180 °C    |
| Scan Begin  | 50 m/z     | Set End Plate Offset | -500 V   | Set Dry Gas      | 4.0 l/min |
| Scan End    | 3000 m/z   | Set Charging Voltage | 2000 V   | Set Divert Valve | Source    |
|             |            | Set Corona           | 0 nA     | Set APCI Heater  | 0 °C      |

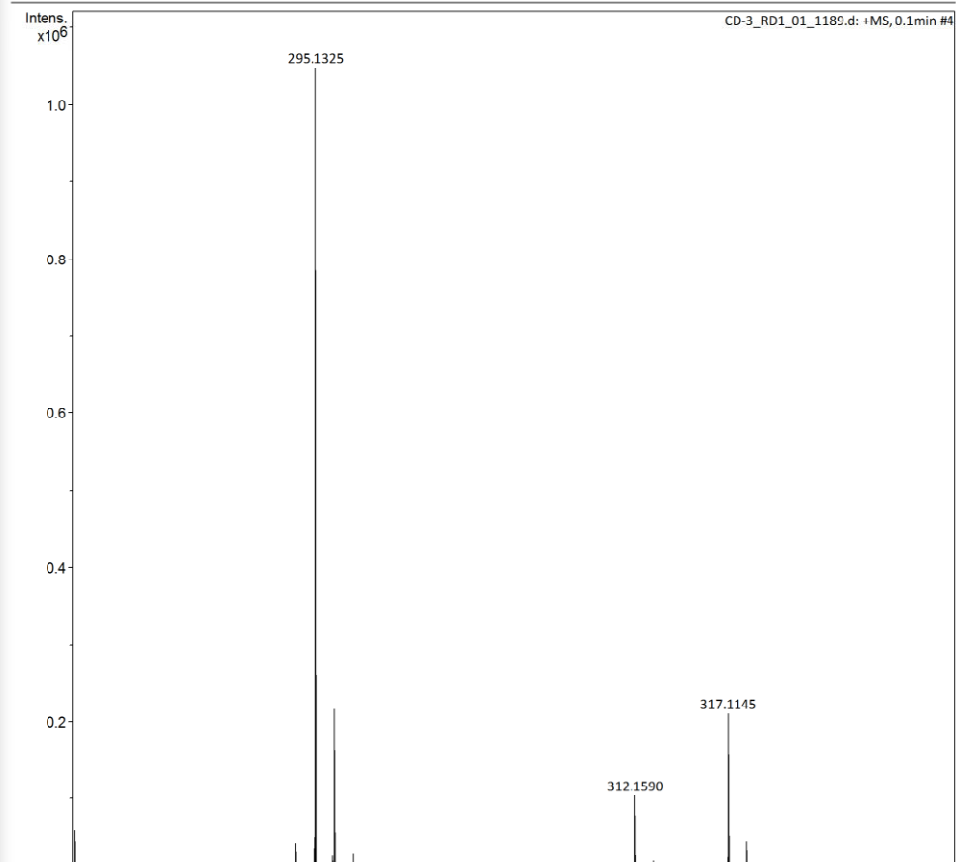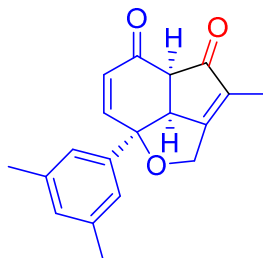

2i

Chemical Formula: C<sub>19</sub>H<sub>18</sub>O<sub>3</sub>

Exact Mass: 294.1256

Molecular Weight: 294.3500

m/z: 294.1256 (100.0%), 295.1289 (20.5%), 296.1323 (2.0%)

HRMS (ESI, m/z) calcd for C<sub>19</sub>H<sub>18</sub>O<sub>3</sub> [M+H]<sup>+</sup> 295.1329, found 295.1325.

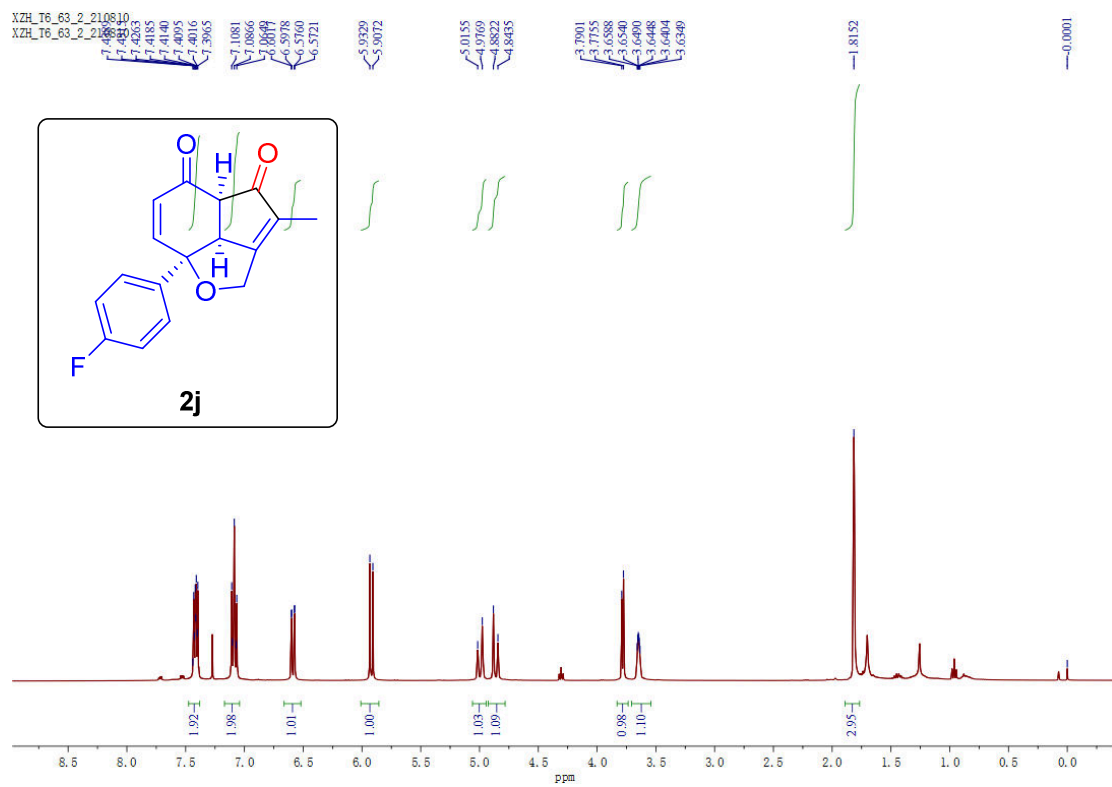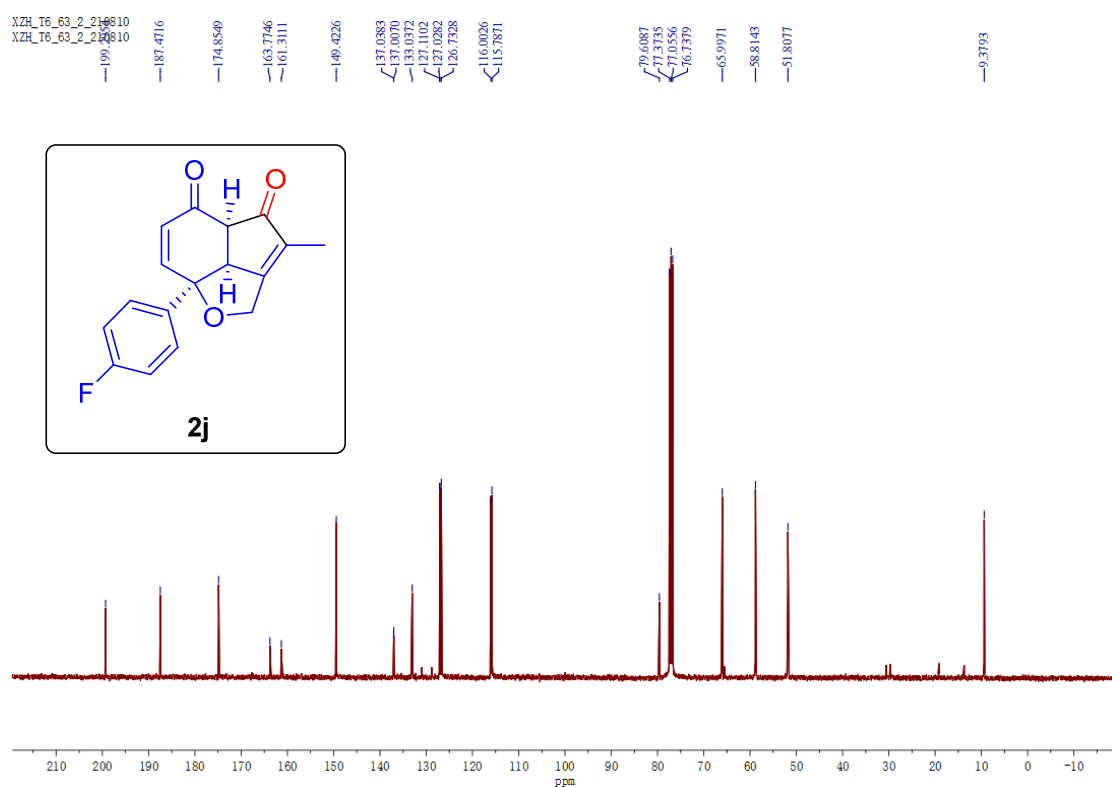

# Display Report

## Analysis Info

Analysis Name D:\Data\Fenglei\T6-63-2\_RA2\_C1\_8834.d  
Method 1225-1.m  
Sample Name T6-63-2  
Comment

Acquisition Date 8/12/2021 3:21:45 PM

Operator Demo User  
Instrument Impact II 1825265.10256

## Acquisition Parameter

|             |            |                      |          |                  |           |
|-------------|------------|----------------------|----------|------------------|-----------|
| Source Type | ESI        | Ion Polarity         | Positive | Set Nebulizer    | 0.4 Bar   |
| Focus       | Not active | Set Capillary        | 2600 V   | Set Dry Heater   | 180 °C    |
| Scan Begin  | 50 m/z     | Set End Plate Offset | -500 V   | Set Dry Gas      | 4.0 l/min |
| Scan End    | 3000 m/z   | Set Charging Voltage | 2000 V   | Set Divert Valve | Source    |
|             |            | Set Corona           | 0 nA     | Set APCI Heater  | 0 °C      |

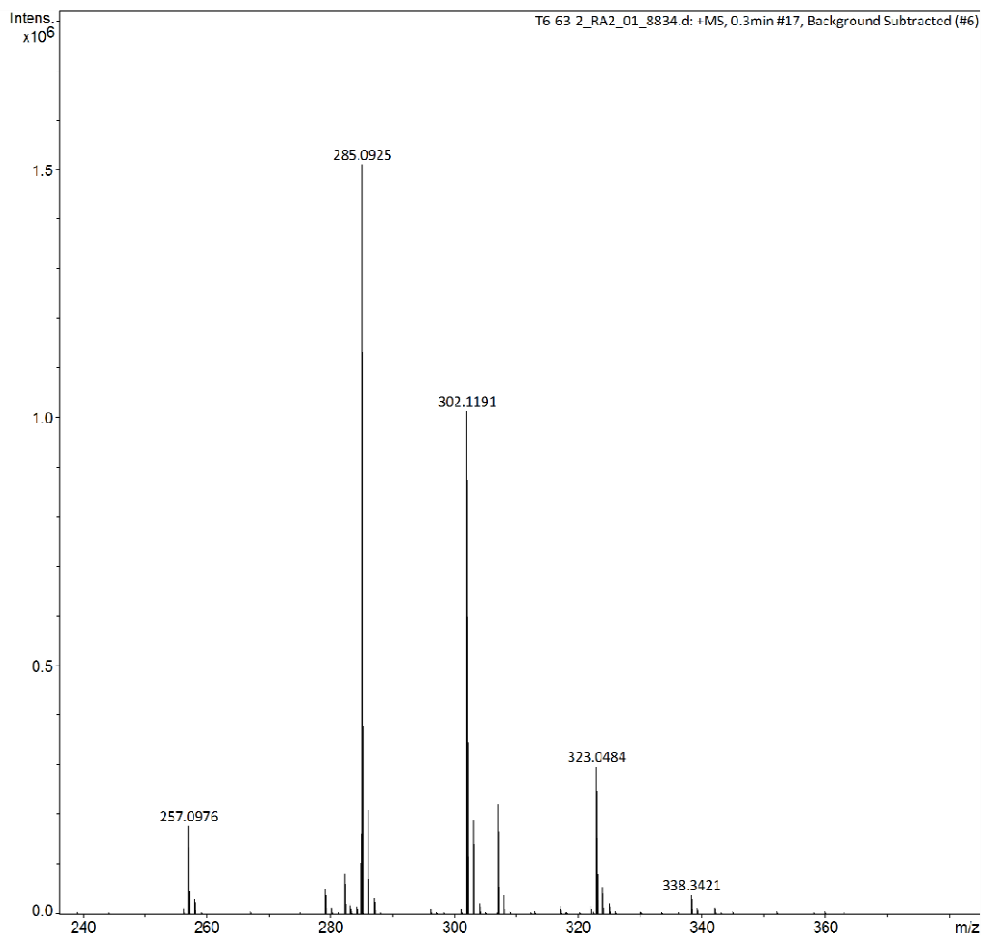

T6-63-2\_RA2\_01\_8834.d  
Bruker Compass DataAnalysis 4.4

printed: 8/12/2021 3:23:35 PM

by: demo

Page 1 of 1

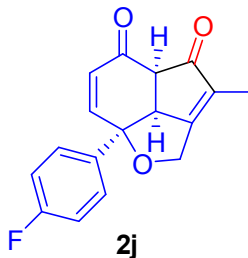

Chemical Formula:  $C_{17}H_{13}FO_3$

Exact Mass: 284.0849

Molecular Weight: 284.2864

m/z: 284.0849 (100.0%), 285.0882 (18.4%), 286.0916 (1.6%)

HRMS (ESI, m/z) calcd for  $C_{17}H_{13}FO_3$   $[M+H]^+$  285.0921, found 285.0925.

T6-53-2

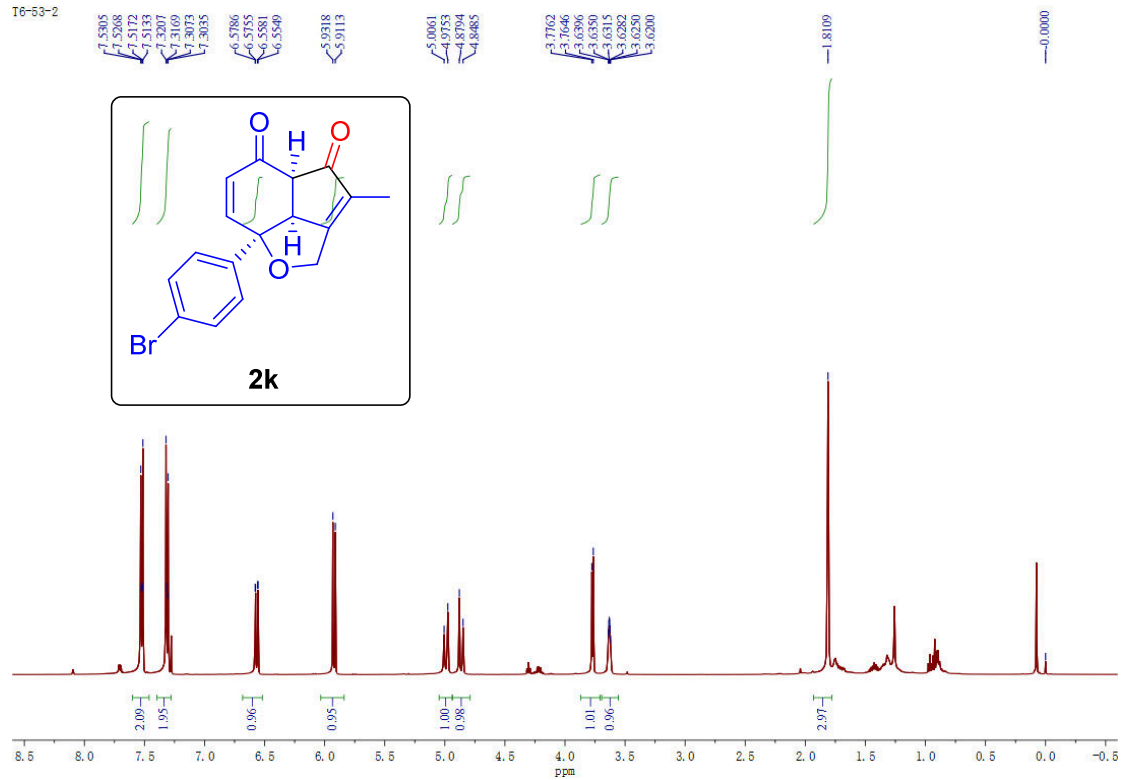

T6-53-2

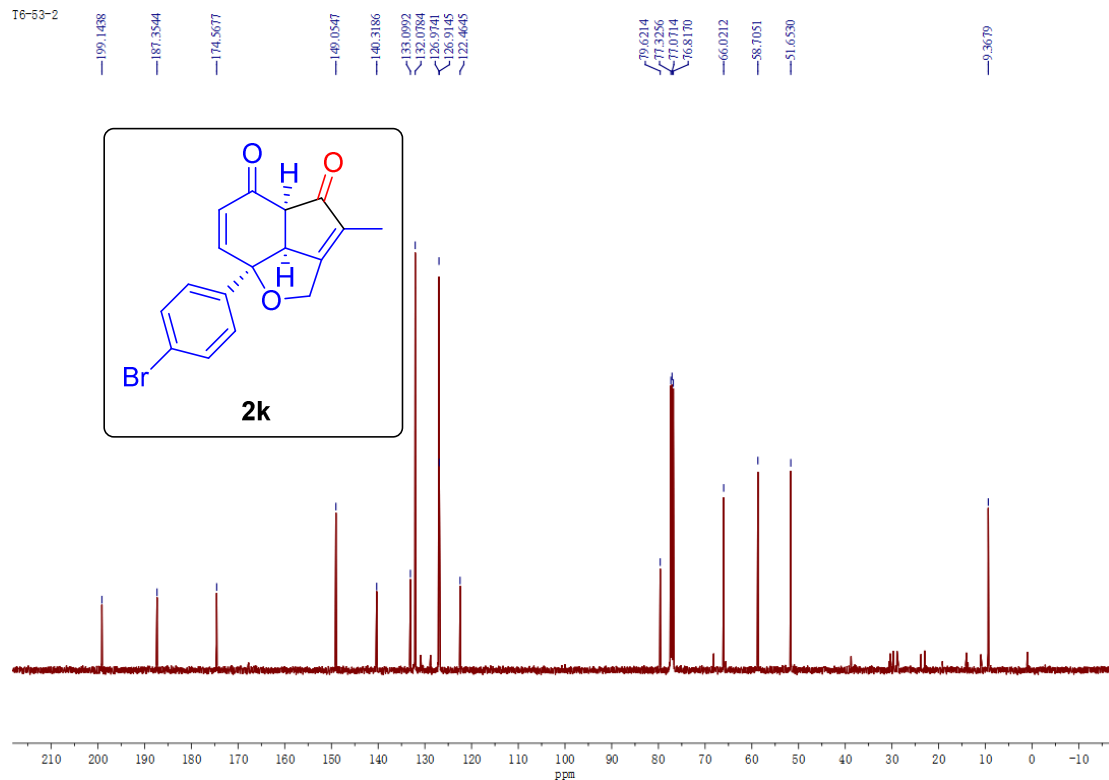

# Display Report

## Analysis Info

Analysis Name U:\data\englex\16-55-2\_BD3\_01\_2251.d  
Method 1009-ma.m  
Sample Name T6-55-2  
Comment

Acquisition Date 12/10/2021 1 35:30 PM

Operator Demc User  
Instrument impact II 1825285.10250

## Acquisition Parameter

|             |            |                      |          |                  |           |
|-------------|------------|----------------------|----------|------------------|-----------|
| Source Type | ESI        | Ion Polarity         | Positive | Set Nebulizer    | 0.4 Bar   |
| Focus       | Not active | Set Capillary        | 2800 V   | Set Dry Heater   | 180 °C    |
| Scan Begin  | 50 m/z     | Set End Plate Offset | -500 V   | Set Dry Gas      | 4.0 l/min |
| Scan End    | 3000 m/z   | Set Charging Voltage | 2000 V   | Set Divert Valve | Source    |
|             |            | Set Corona           | 0 nA     | Set APCI Heater  | 0 °C      |

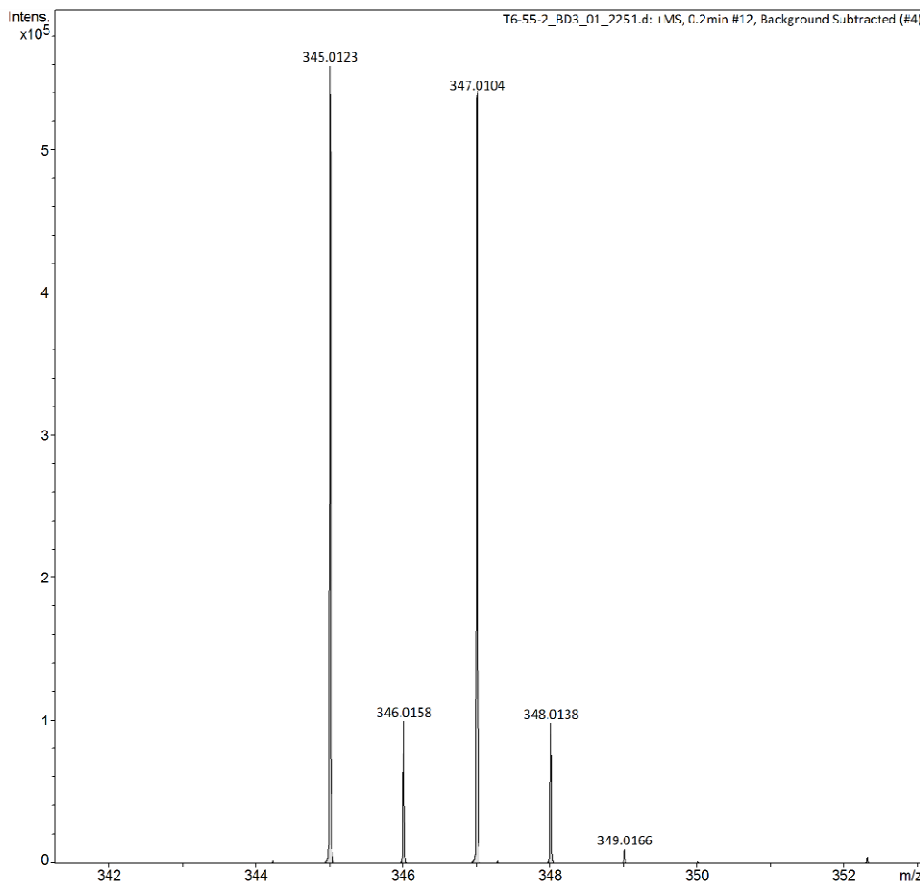

T6-55-2\_BD3\_01\_2251.d  
Bruker Compass DataAnalysis 4.4

printed: 12/10/2021 1:37:53 PM

by: demo

Page 1 of 1

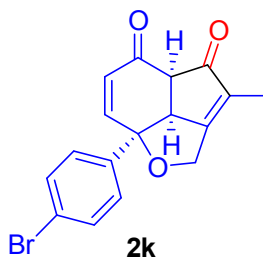

Chemical Formula:  $C_{17}H_{13}BrO_3$

Exact Mass: 344.0048

Molecular Weight: 345.1920

m/z: 344.0048 (100.0%), 346.0028 (97.3%), 345.0082 (18.4%),  
347.0061 (17.9%), 346.0115 (1.6%), 348.0095 (1.5%)

HRMS (ESI, m/z) calcd for  $C_{17}H_{13}BrO_3$   $[M+H]^+$  345.0121, found 345.0123.



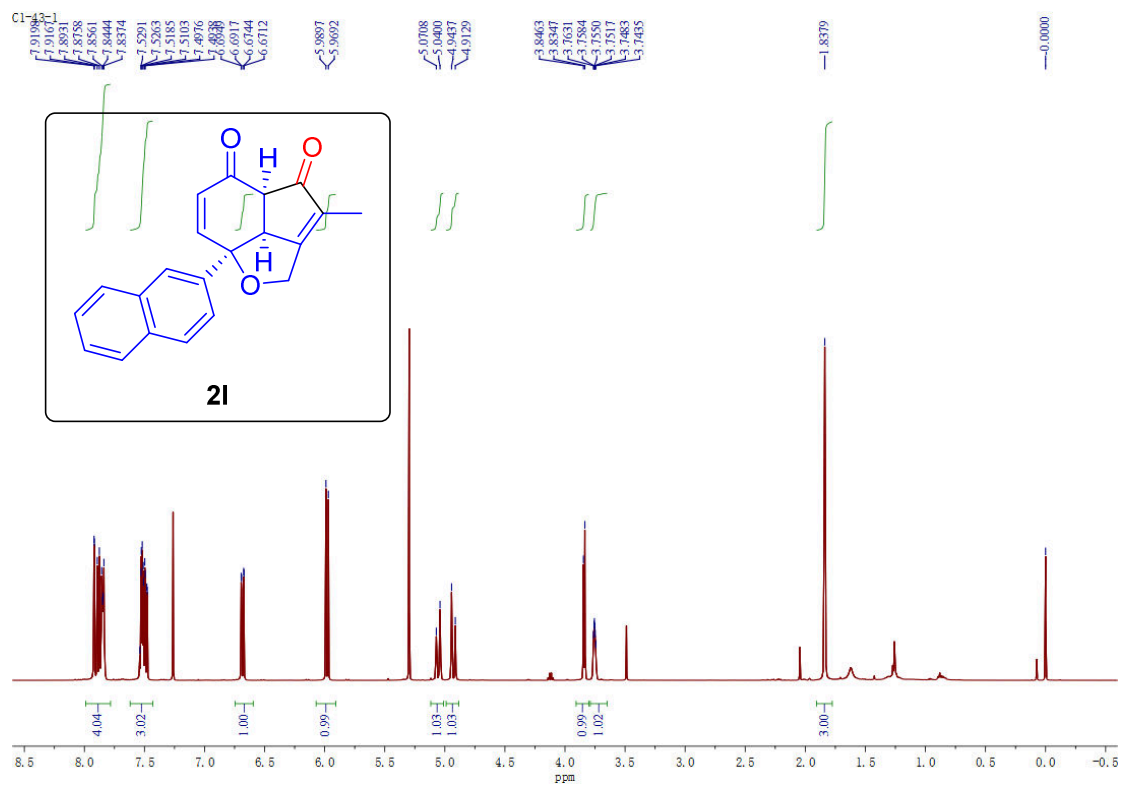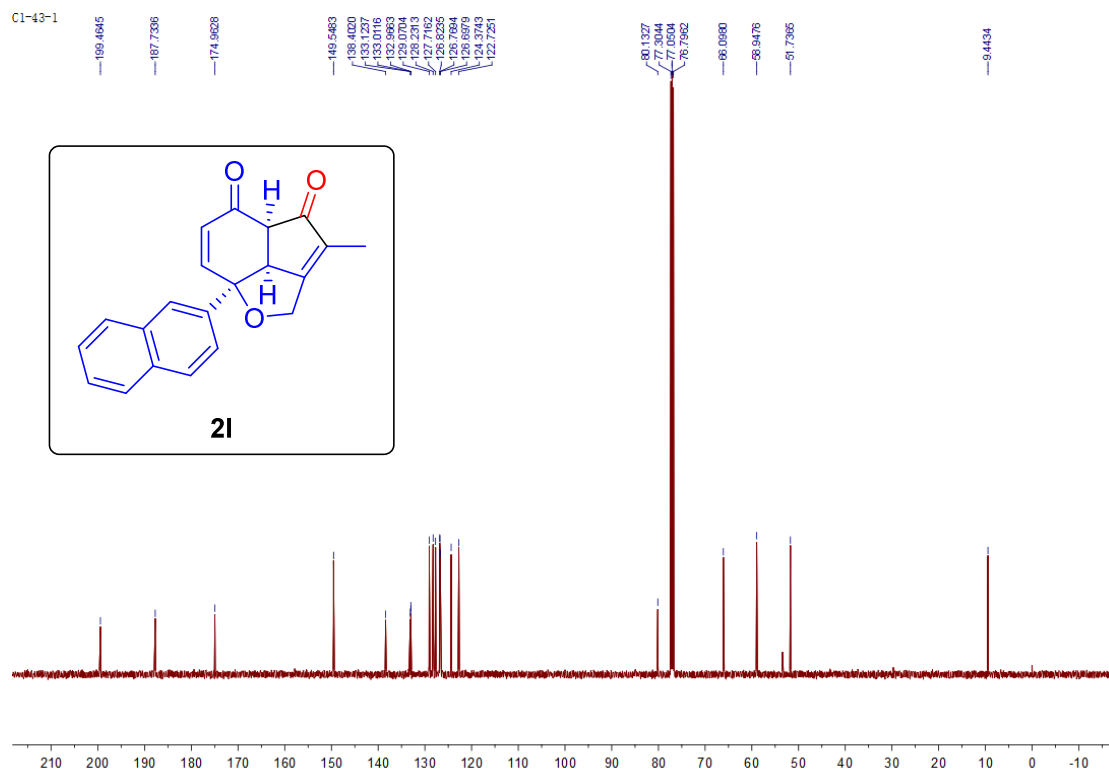

# Display Report

## Analysis Info

Analysis Name D:\data\engle\CD-1\_RB1\_01\_1187.d  
Method 1008-ms.m  
Sample Name CD-1  
Comment

Acquisition Date 11/12/2021 4:08:05 PM

Operator Demo User  
Instrument impact II 1825285.10256

## Acquisition Parameter

|             |            |                      |          |                  |           |
|-------------|------------|----------------------|----------|------------------|-----------|
| Source Type | ESI        | Ion Polarity         | Positive | Set Nebulizer    | 0.4 Bar   |
| Focus       | Not active | Set Capillary        | 2600 V   | Set Dry Heater   | 180 °C    |
| Scan Begin  | 50 m/z     | Set End Plate Offset | -500 V   | Set Dry Gas      | 4.0 l/min |
| Scan End    | 3000 m/z   | Set Charging Voltage | 2000 V   | Set Divert Valve | Source    |
|             |            | Set Corona           | 0 nA     | Set APCI Heater  | 0 °C      |

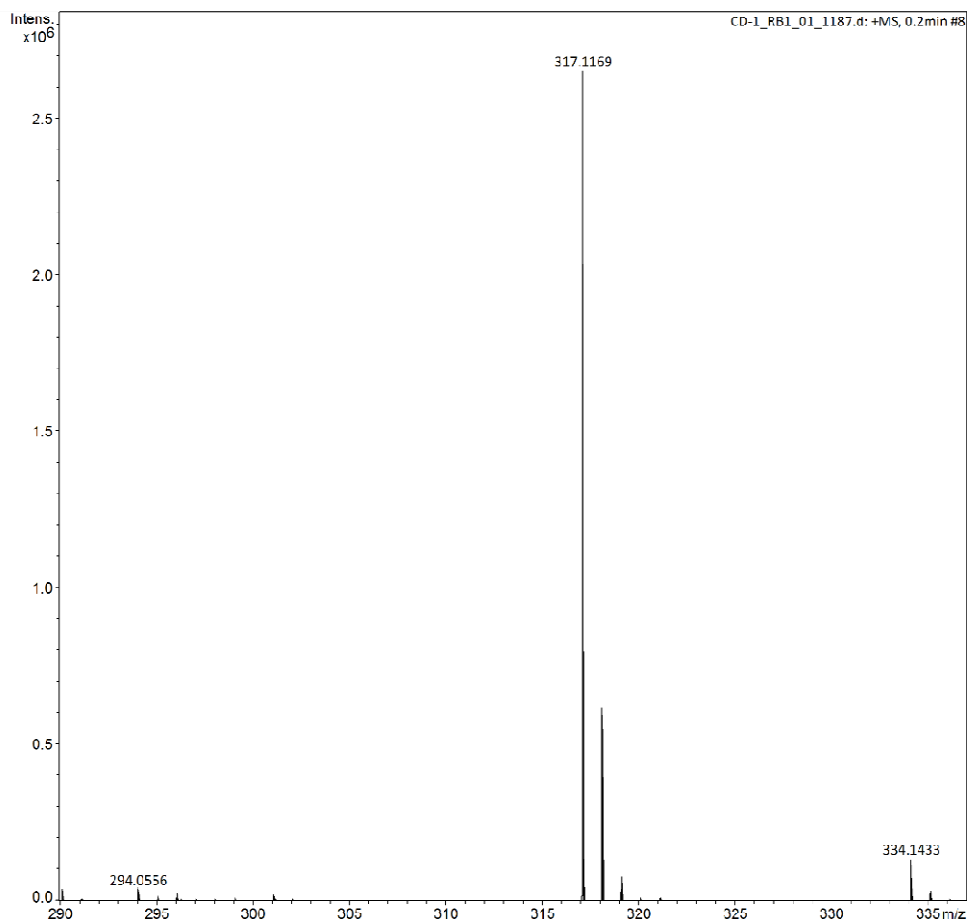

CD-1\_RB1\_01\_1187.d

Braker Compass DataAnalysis 4.4

printed: 11/12/2021 4:08:45 PM

by: demo

Page 1 of 1

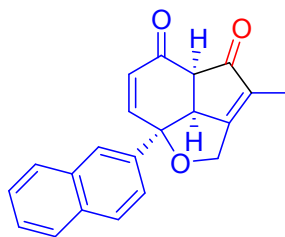

2I

Chemical Formula: C<sub>21</sub>H<sub>16</sub>O<sub>3</sub>

Exact Mass: 316.1099

Molecular Weight: 316.3560

m/z: 316.1099 (100.0%), 317.1133 (22.7%), 318.1167 (2.5%)

HRMS (ESI, m/z) calcd for C<sub>21</sub>H<sub>16</sub>O<sub>3</sub> [M+H]<sup>+</sup> 317.1172, found 317.1169.

XZH-T6-72-1-0812-210813  
XZH-T6-72-1-0812-210813

6.6018  
6.5970  
6.5720

5.7833  
5.7575

4.8662  
4.8267  
4.6952  
4.6558

3.6784  
3.6638  
3.3983  
3.3988  
3.3891  
3.3841  
3.3794

2.2832  
2.2641  
2.2448  
2.2247  
2.2015  
2.1824  
2.1653

1.6069  
1.0568  
1.0378  
1.0187

0.0000

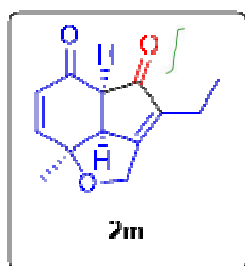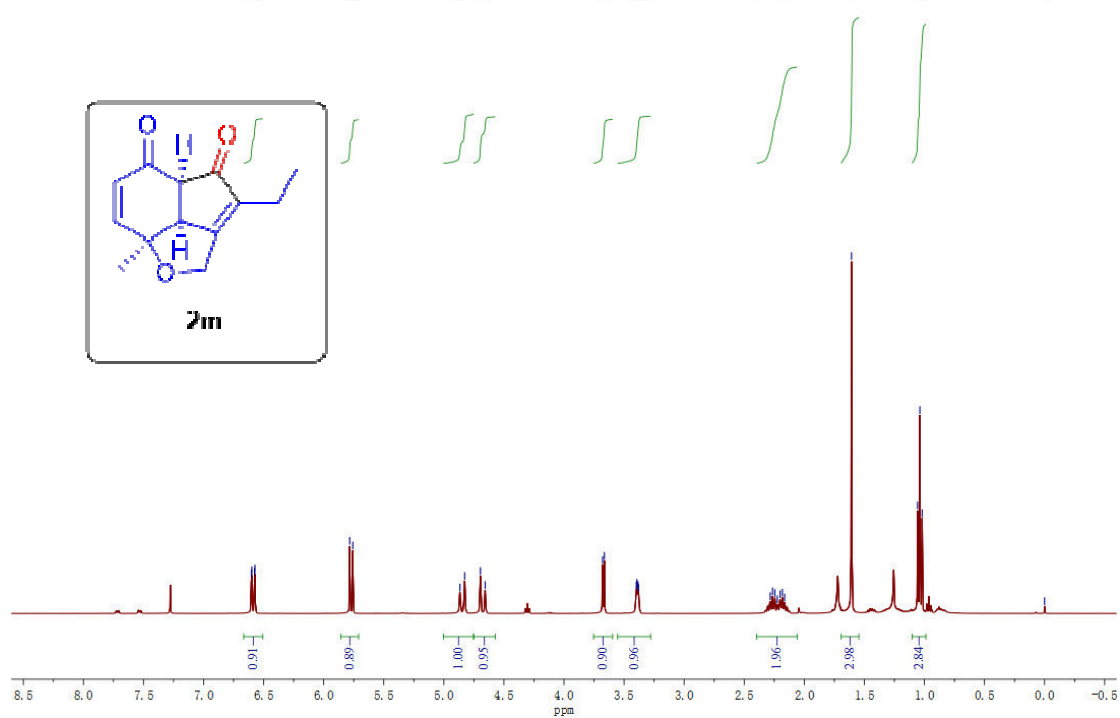

XZH-T6-72-1-0812-210813  
XZH-T6-72-1-0812-210813

199.3466  
187.5466

175.2487

151.3555

136.3241

126.5954

77.3639  
77.0462  
76.7285

65.7568

58.9472

50.3591

26.4272

17.8765

11.9514

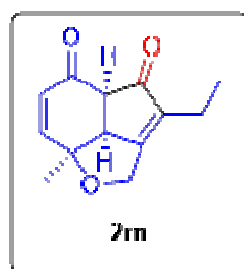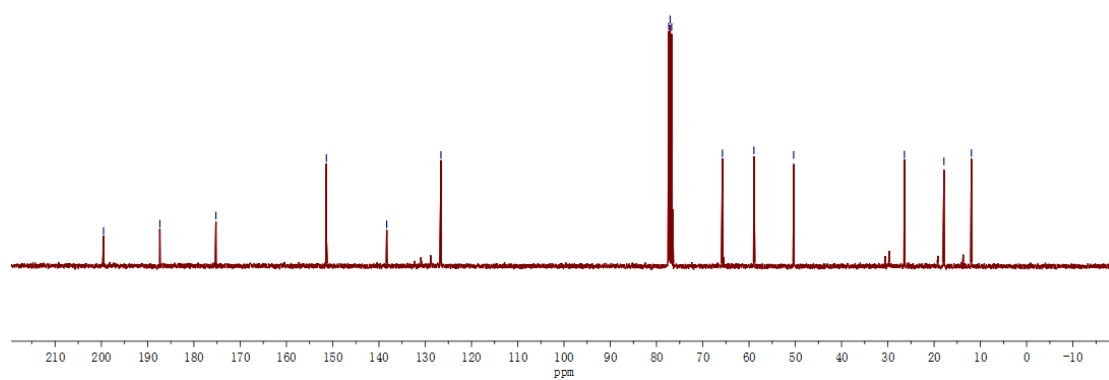

# Display Report

## Analysis Info

Analysis Name D:\Data\T6-73-2\_RA4\_01\_9264.d  
Method 1225-1.m  
Sample Name T6-73-2  
Comment

Acquisition Date 8/25/2021 2:28:25 PM  
Operator Demo User  
Instrument Impact II 1825265.10256

## Acquisition Parameter

|             |            |                      |          |                  |           |
|-------------|------------|----------------------|----------|------------------|-----------|
| Source Type | ESI        | Ion Polarity         | Positive | Set Nebulizer    | 0.4 Bar   |
| Focus       | Not active | Set Capillary        | 2600 V   | Set Dry Heater   | 180 °C    |
| Scan Begin  | 50 m/z     | Set End Plate Offset | -500 V   | Set Dry Gas      | 4.0 l/min |
| Scan End    | 3000 m/z   | Set Charging Voltage | 2000 V   | Set Divert Valve | Source    |
|             |            | Set Corona           | 0 nA     | Set APCI Heater  | 0 °C      |

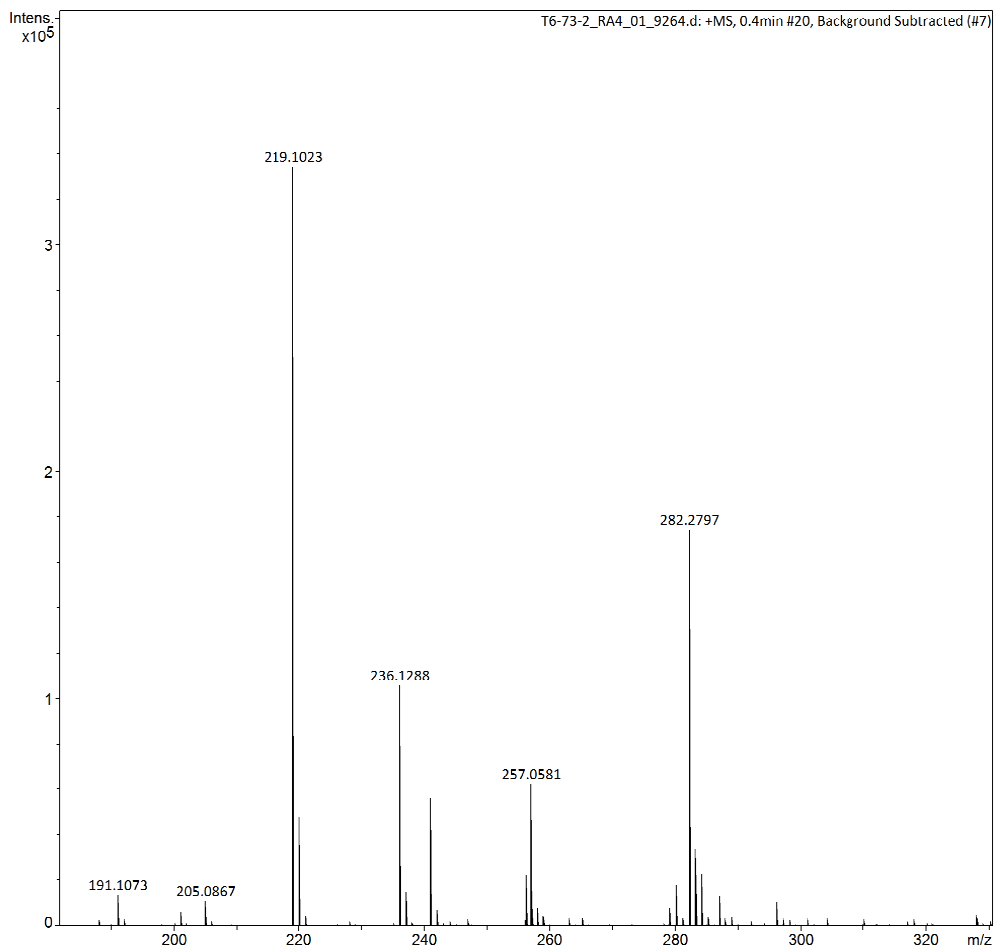

T6-73-2\_RA4\_01\_9264.d

Bruker Compass DataAnalysis 4.4

printed: 8/25/2021 2:29:53 PM

by: demo

Page 1 of 1

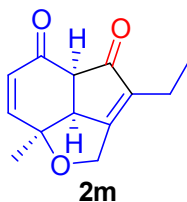

Chemical Formula:  $C_{13}H_{14}O_3$

Exact Mass: 218.0943

Molecular Weight: 218.2520

m/z: 218.0943 (100.0%), 219.0976 (14.1%)

HRMS (ESI, m/z) calcd for  $C_{13}H_{14}O_3$   $[M+H]^+$  219.1016, found 219.1023.

T6-20-2

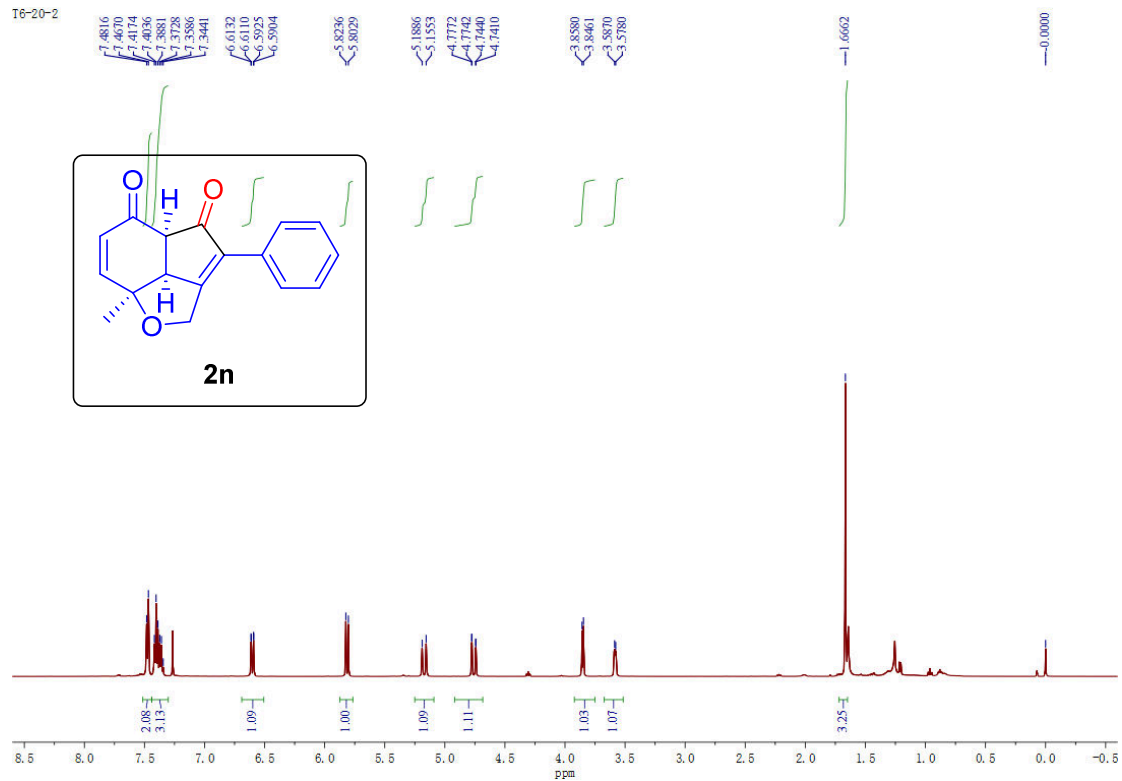

T6-20-2

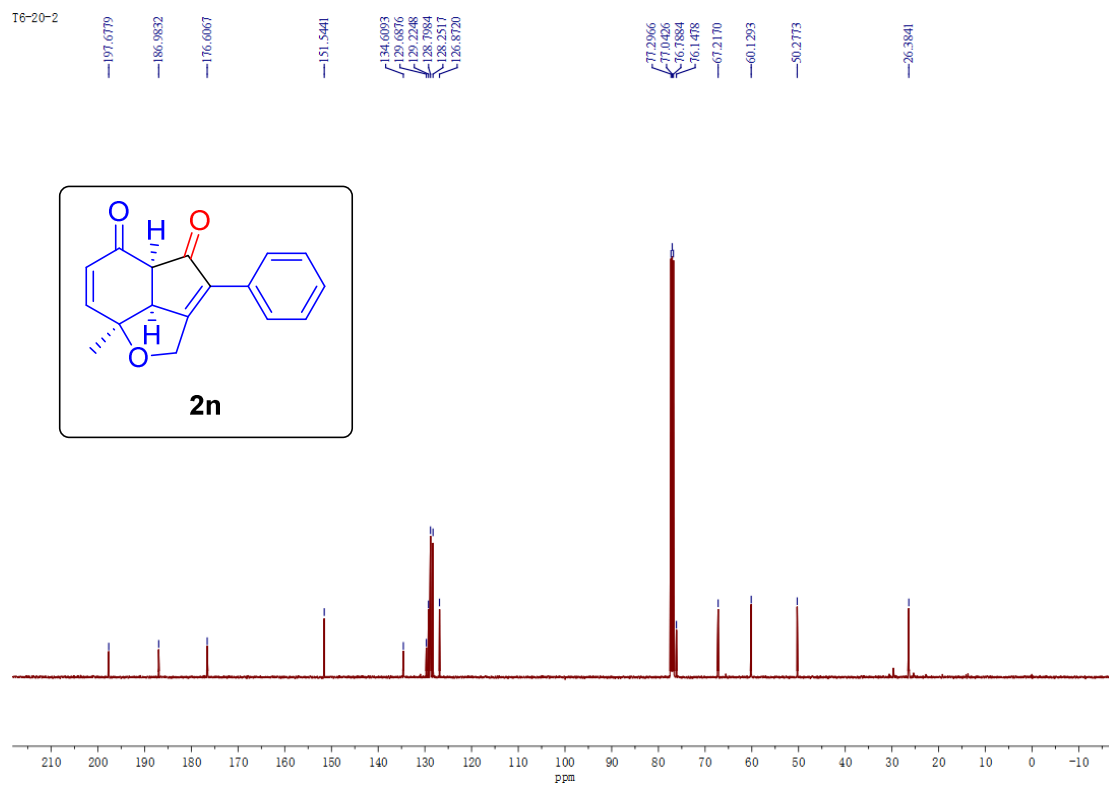

## Display Report

### Analysis Info

Analysis Name D:\Data\feinglei\T6-20-2\_RC1\_01\_4861.d  
Method 1225-1.m  
Sample Name T6-20-2  
Comment

Acquisition Date 4/28/2021 3:33:43 PM

Operator Demo User  
Instrument impact II 1825265.10256

### Acquisition Parameter

|             |            |                      |          |                  |           |
|-------------|------------|----------------------|----------|------------------|-----------|
| Source Type | ESI        | Ion Polarity         | Positive | Set Nebulizer    | 0.4 Bar   |
| Focus       | Not active | Set Capillary        | 2600 V   | Set Dry Heater   | 180 °C    |
| Scan Begin  | 50 m/z     | Set End Plate Offset | -500 V   | Set Dry Gas      | 4.0 l/min |
| Scan End    | 1300 m/z   | Set Charging Voltage | 2000 V   | Set Divert Valve | Source    |
|             |            | Set Corona           | 0 nA     | Set APCI Heater  | 0 °C      |

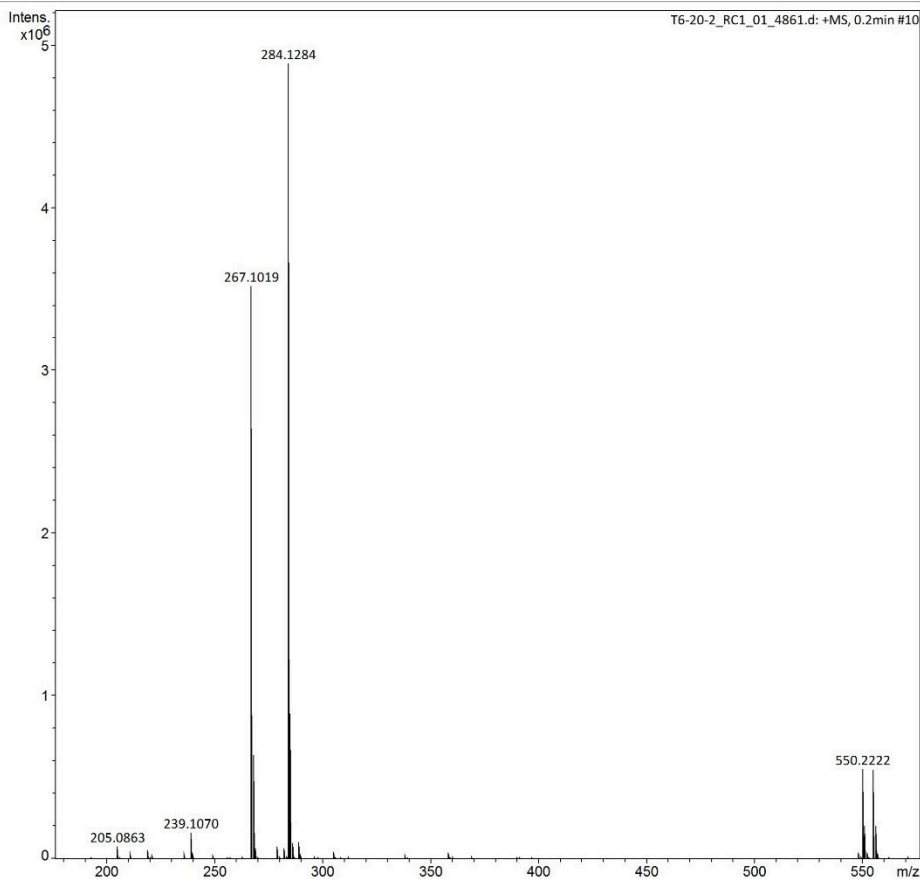

T6-20-2\_RC1\_01\_4861.d

Bruker Compass DataAnalysis 4.4

printed: 4/28/2021 3:57:48 PM

by: demo

Page 1 of 1

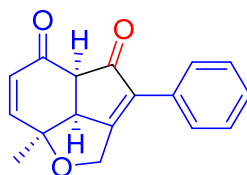

**2n**

Chemical Formula: C<sub>17</sub>H<sub>14</sub>O<sub>3</sub>

Exact Mass: 266.0943

Molecular Weight: 266.2960

m/z: 266.0943 (100.0%), 267.0976 (18.4%), 268.1010 (1.6%)

HRMS (ESI, m/z) calcd for C<sub>17</sub>H<sub>14</sub>O<sub>3</sub> [M+NH<sub>4</sub>]<sup>+</sup> 284.1281, found 284.1284.

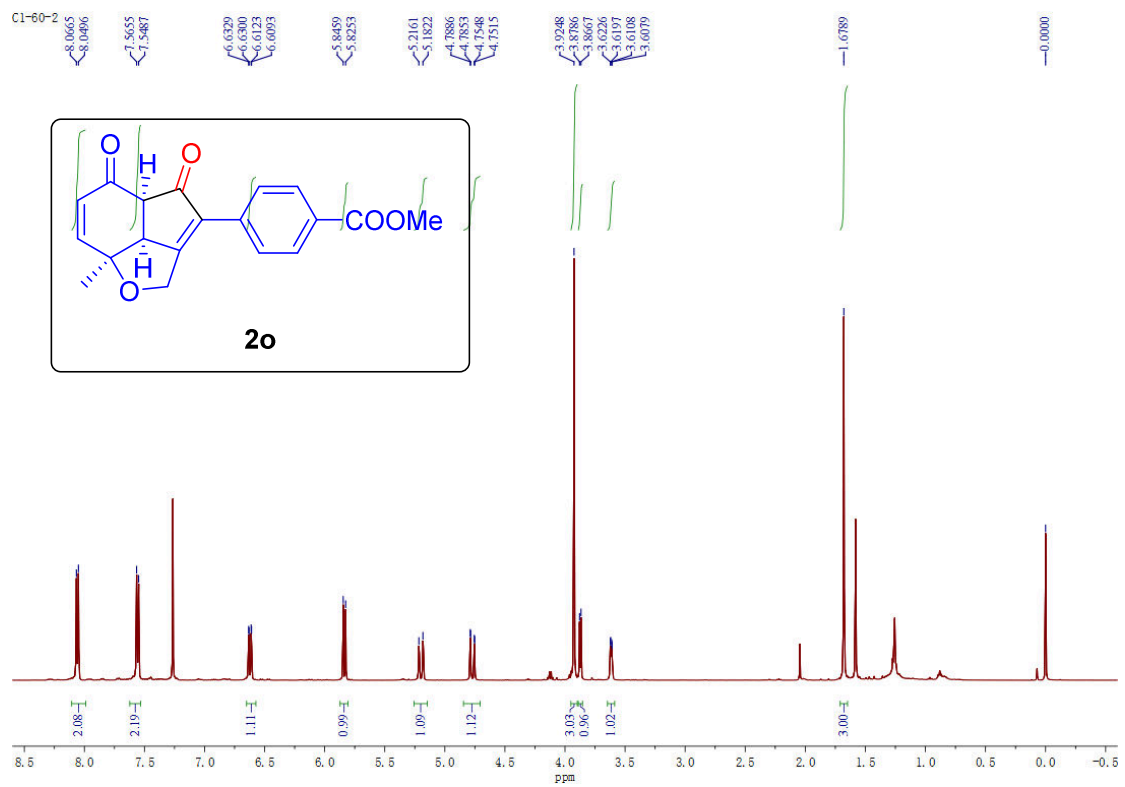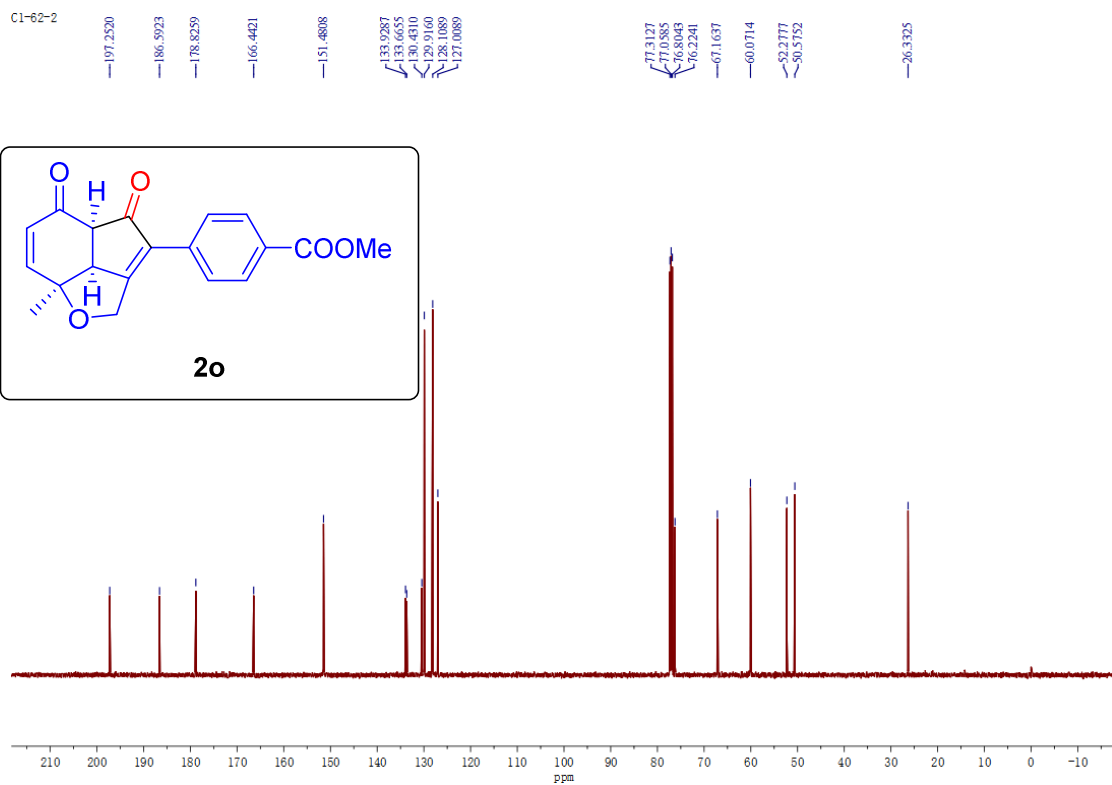

# Display Report

## Analysis Info

Analysis Name D:\data\heng\CD-1-60-2\_RA1\_01\_1882.d  
Method 1008-ms.m  
Sample Name CD-1-60-2  
Comment:

Acquisition Date 12/2/2021 4:03:56 PM

Operator Demo User  
Instrument impact II 1825265.10256

## Acquisition Parameter

Source Type ESI  
Focus No: active  
Scan Begin 50 m/z  
Scan End 3000 m/z

Ion Polarity Positive  
Set Capillary 2600 V  
Set End Plate Offset -500 V  
Set Charging Voltage 2000 V  
Set Corona 0 nA

Set Nebulzer C.4 Bar  
Set Dry Heater 180 °C  
Set Dry Gas 4.0 l/min  
Set Divert Valve Source  
Set APC Heater C °C

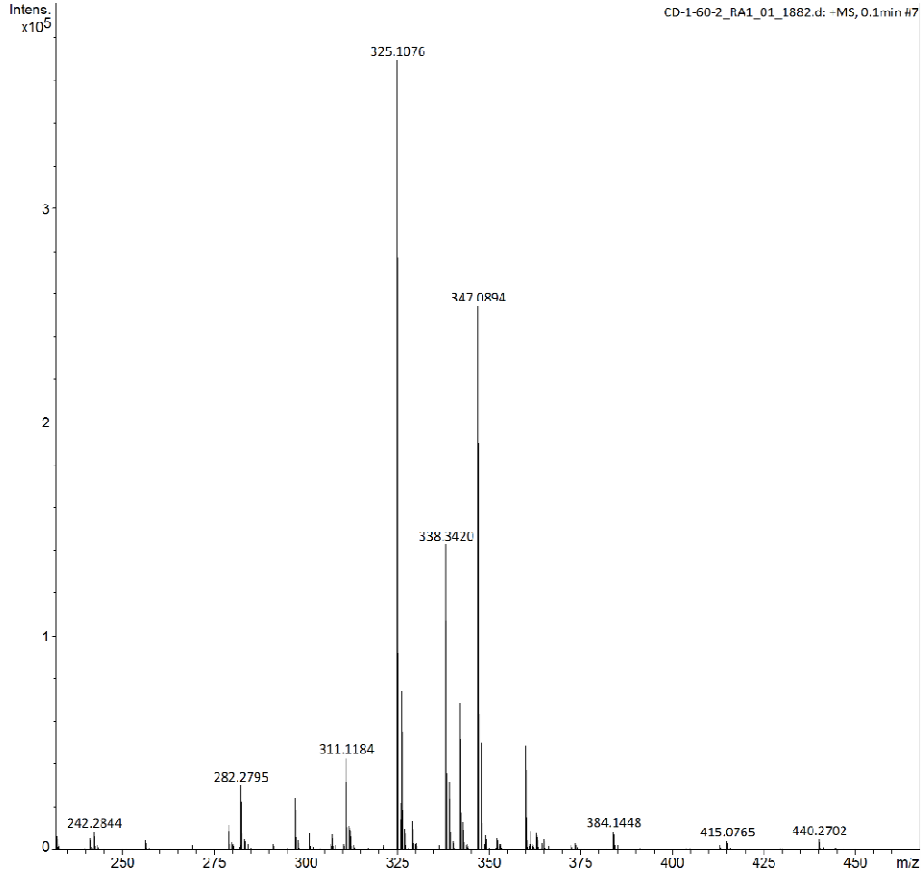

CD-1-60-2\_RA1\_01\_1882.d  
Bruker Compass DataAnalysis 4.4

printed: 12/2/2021 4:06:56 PM

by: demo

Page 1 of 1

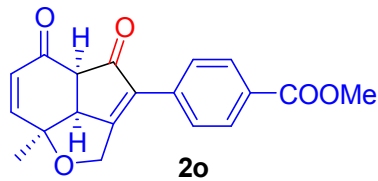

Chemical Formula: C<sub>19</sub>H<sub>16</sub>O<sub>5</sub>

Exact Mass: 324.0998

Molecular Weight: 324.3320

m/z: 324.0998 (100.0%), 325.1031 (20.5%), 326.1065 (2.0%), 326.1040 (1.0%)

HRMS (ESI, m/z) calcd for C<sub>19</sub>H<sub>16</sub>O<sub>5</sub> [M+H]<sup>+</sup> 325.1071, found 325.1076



C1-56

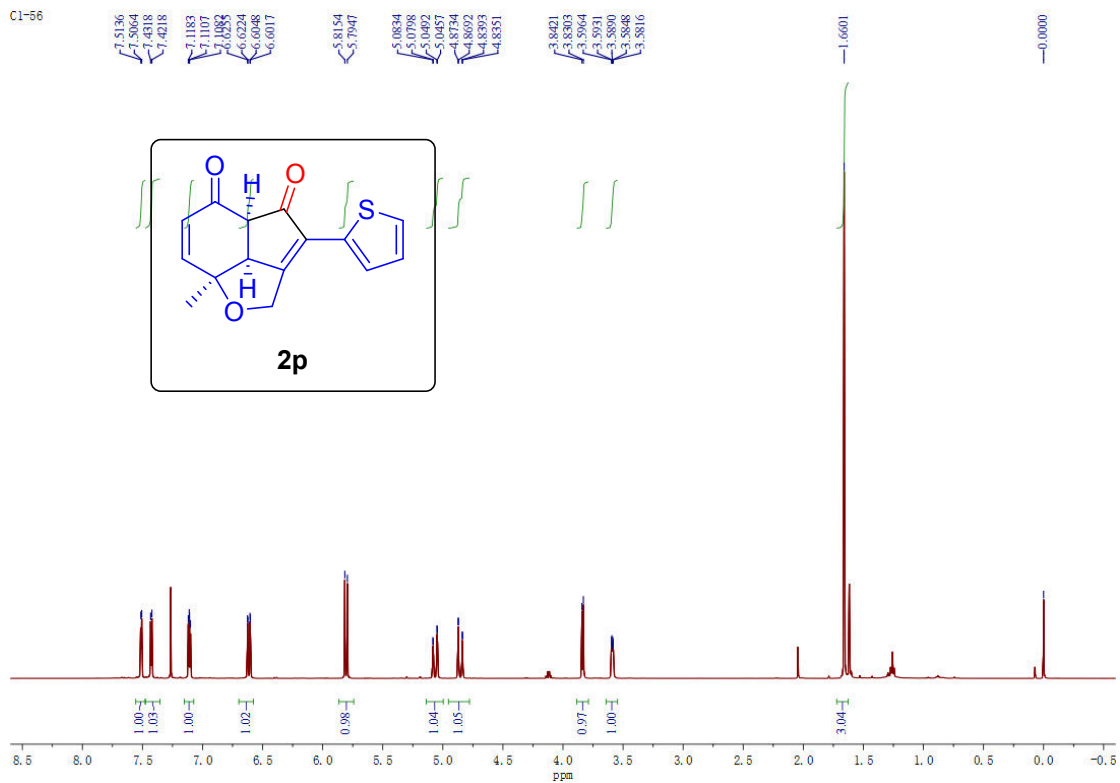

C1-56

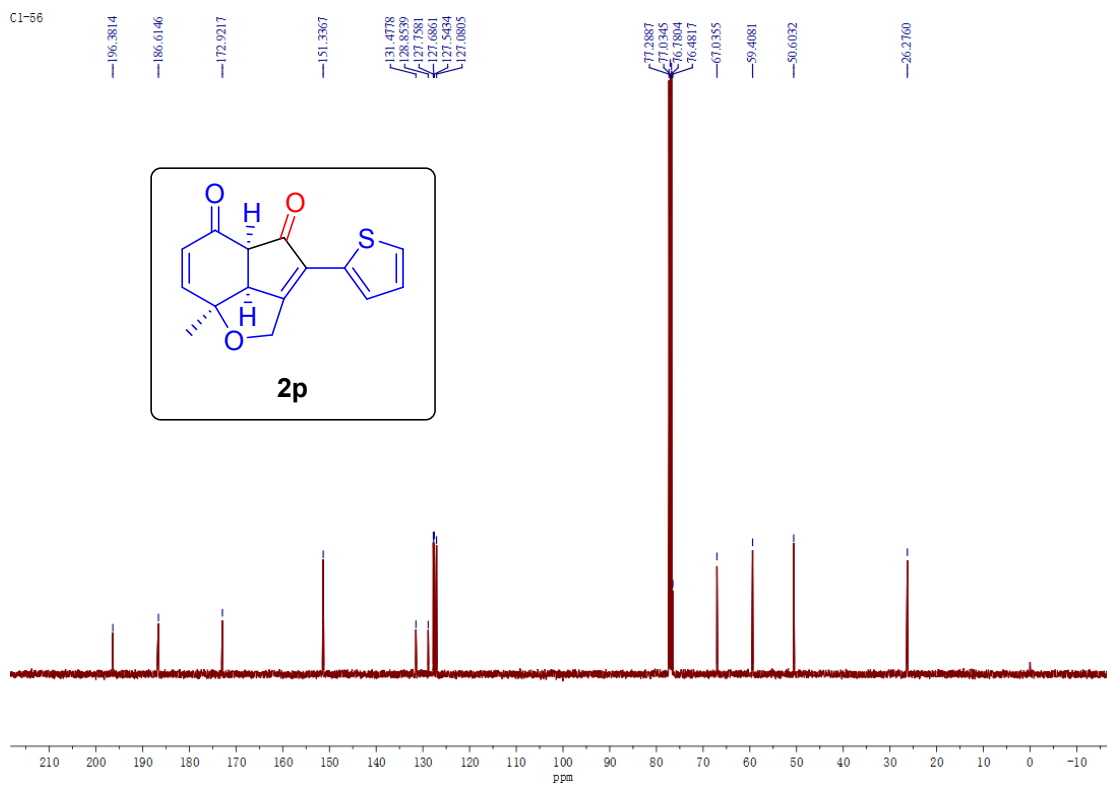

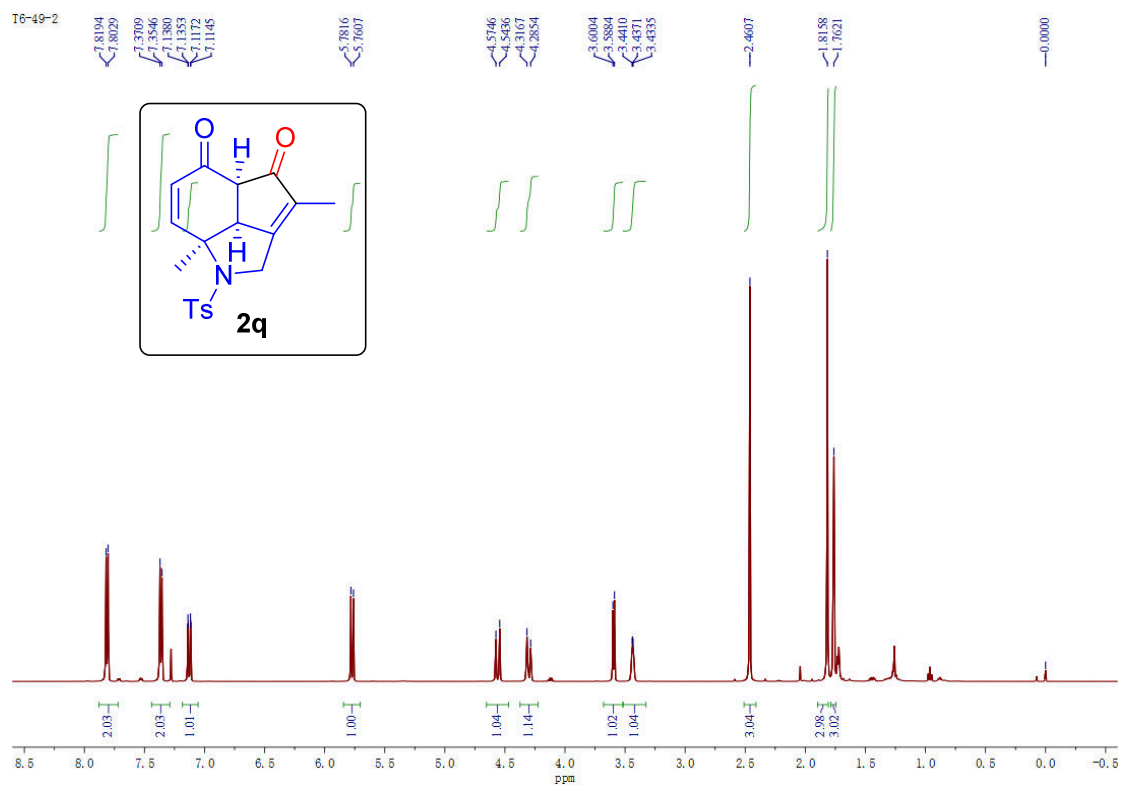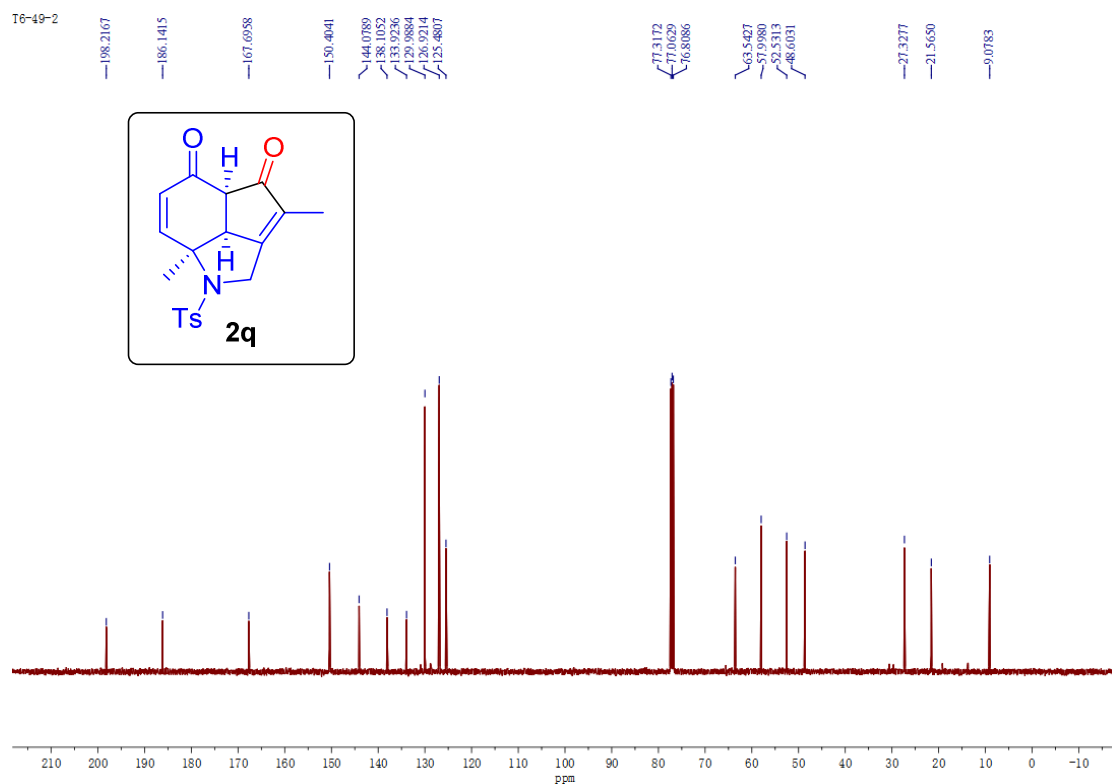

# Display Report

## Analysis Info

Analysis Name D:\Data\engle\TQ\_RA2\_01\_7070.d  
Method 1225-1.m  
Sample Name IQ  
Comment

Acquisition Date 7/2/2021 4:35:33 PM

Operator Demo User  
Instrument impact II 1825265.10256

## Acquisition Parameter

|             |            |                      |          |                  |           |
|-------------|------------|----------------------|----------|------------------|-----------|
| Source Type | ESI        | Ion Polarity         | Positive | Set Nebulizer    | 0.4 Bar   |
| Focus       | Not active | Set Capillary        | 2600 V   | Set Dry Heater   | 100 °C    |
| Scan Begin  | 50 m/z     | Set End Plate Offset | -500 V   | Set Dry Gas      | 4.0 l/min |
| Scan End    | 1800 m/z   | Set Charging Voltage | 2000 V   | Set Divert Valve | Source    |
|             |            | Set Corona           | 0 nA     | Set APCI Heater  | 0 °C      |

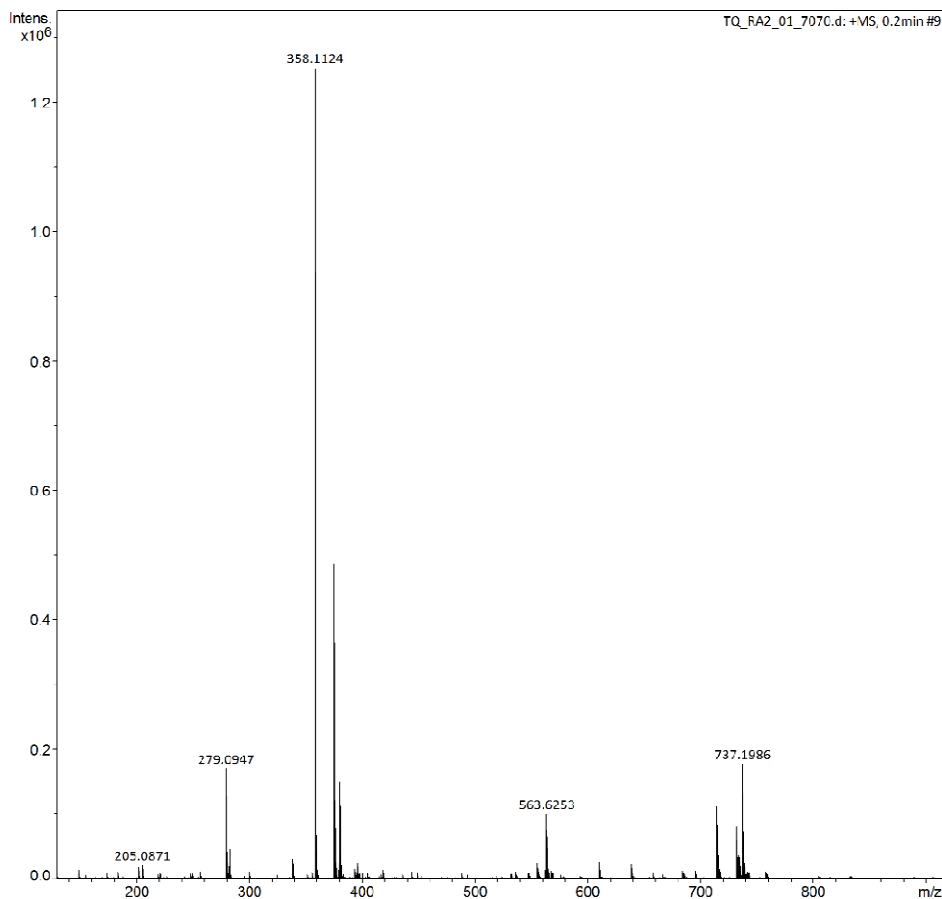

TQ\_RA2\_01\_7070.d

Bruker Compass DataAnalysis 4.4

printed: 7/2/2021 4:40:53 PM

by: demo

Page 1 of 1

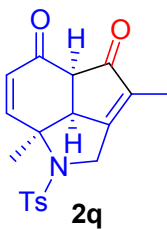

Chemical Formula: C<sub>19</sub>H<sub>19</sub>NO<sub>4</sub>S

Exact Mass: 357.1035

Molecular Weight: 357.4240

m/z: 357.1035 (100.0%), 358.1068 (20.5%), 359.0993 (4.5%),  
359.1102 (2.0%)

HRMS (ESI, m/z) calcd for C<sub>19</sub>H<sub>19</sub>NO<sub>4</sub>S [M+H]<sup>+</sup> 358.1108, found 358.1124.

T6-32-1

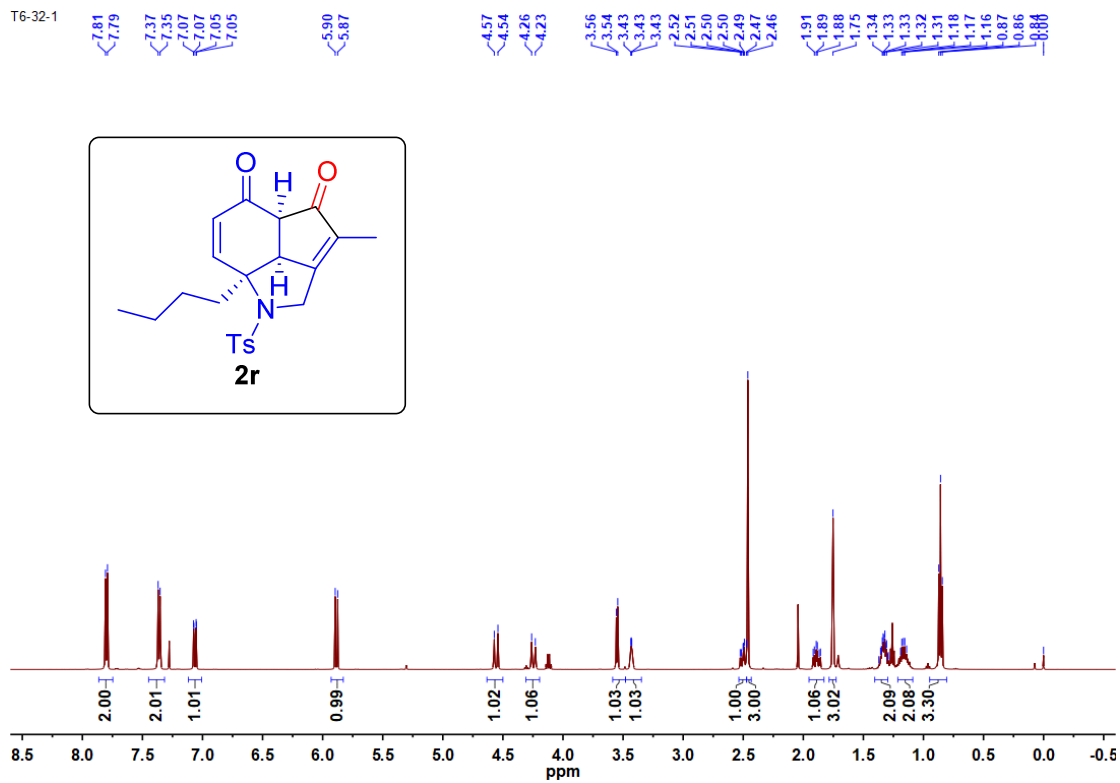

T6-32-1

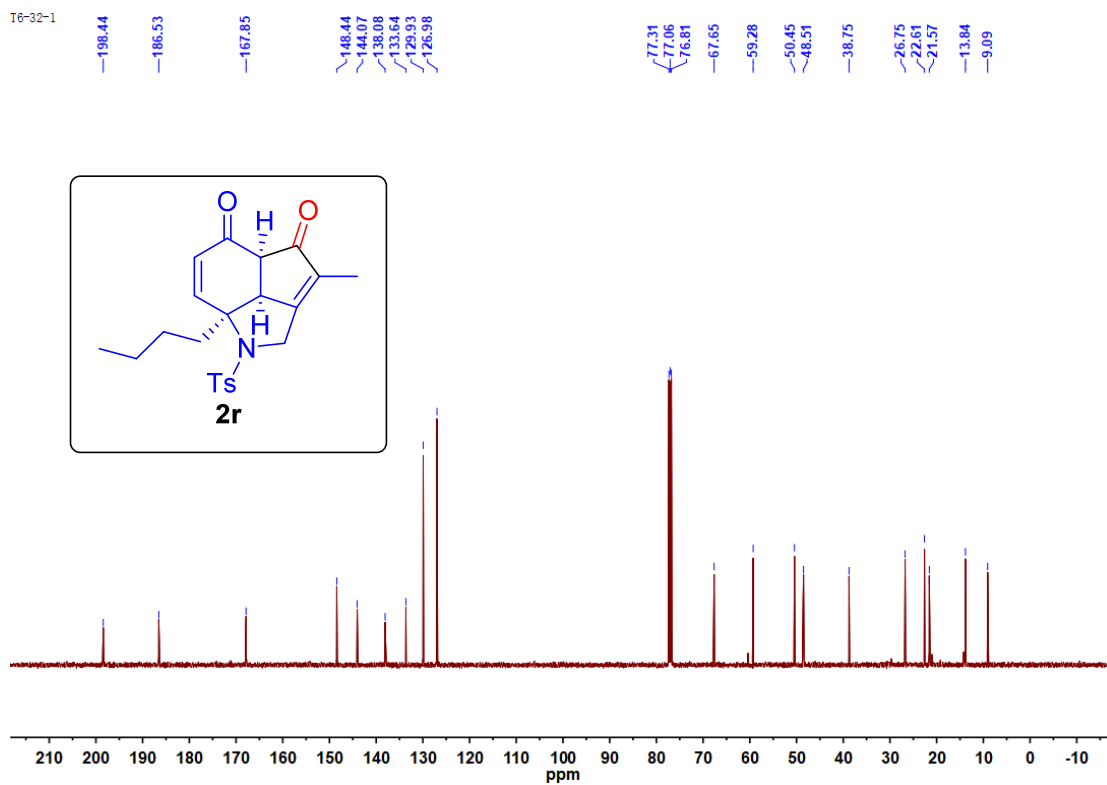

# Display Report

## Analysis Info

Analysis Name D:\Data\angle\T6-32-1\_GD3\_01\_6269.d  
Method 1225-1.m  
Sample Name T6-32-1  
Comment

Acquisition Date 6/9/2021 4:33:23 PM

Operator Demo User  
Instrument impact II 1825265.10256

## Acquisition Parameter

|             |            |                      |          |                  |           |
|-------------|------------|----------------------|----------|------------------|-----------|
| Source Type | ESI        | on Polarity          | Positive | Set Nebulizer    | 0.4 Bar   |
| Focus       | Not active | Set Capillary        | 2800 V   | Set Dry Heater   | 180 °C    |
| Scan Begin  | 50 m/z     | Set End Plate Offset | -500 V   | Set Dry Gas      | 4.0 l/min |
| Scan End    | 1300 m/z   | Set Charging Voltage | 2000 V   | Set Divert Valve | Source    |
|             |            | Set Corona           | 0 nA     | Set APCI Heater  | 0 °C      |

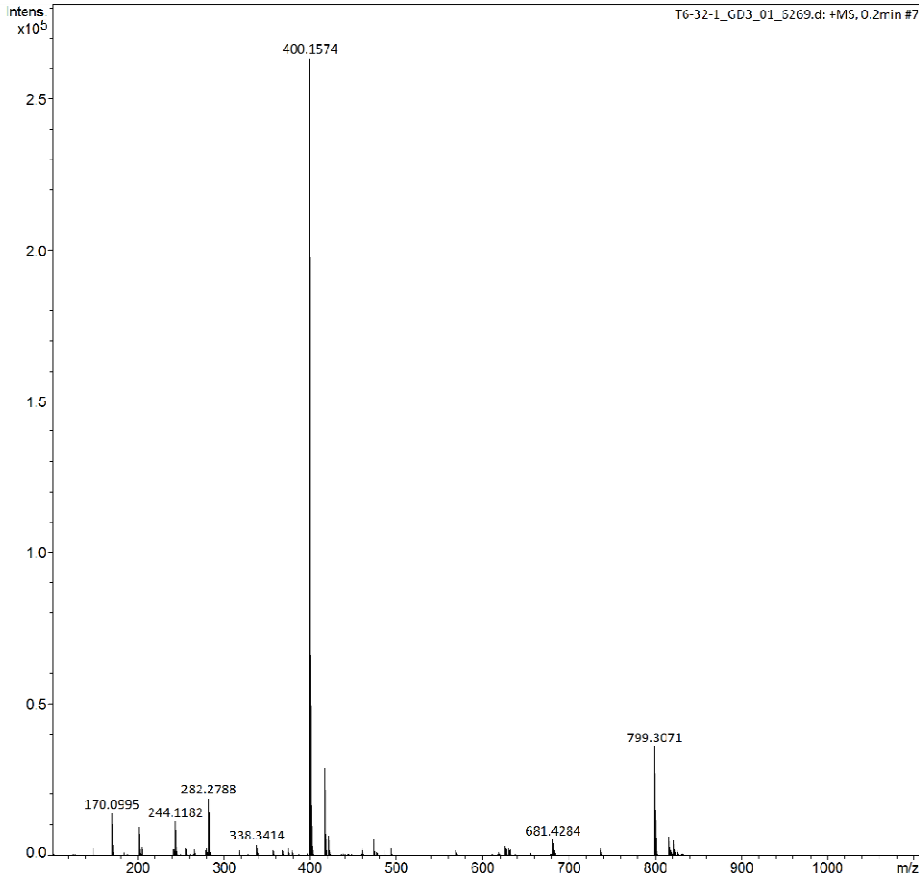

T6-32-1\_GD3\_01\_6269.d  
Bruker Compass DataAnalysis 4.4

printed: 6/9/2021 4:35:35 PM

by: demo

Page 1 of 1

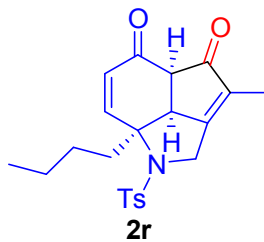

Chemical Formula: C<sub>22</sub>H<sub>25</sub>NO<sub>4</sub>S

Exact Mass: 399.1504

Molecular Weight: 399.5050

m/z: 399.1504 (100.0%), 400.1538 (23.8%), 401.1462 (4.5%),  
401.1571 (2.7%), 402.1496 (1.1%)

HRMS (ESI, m/z) calcd for C<sub>22</sub>H<sub>25</sub>NO<sub>4</sub>S [M+H]<sup>+</sup> 400.1577, found 400.1574.

## 9. Reference

- [1] a) R. Kumar, Y. Hoshimoto, E. Tamai, M. Ohashi, S. Ogoshi, *Nat. Commun.* **2017**, *8*, 32; b) Y. Fukui, P. Liu, Q. Liu, Z.-T. He, N.-Y. Wu, P. Tian, G.-Q. Lin, *J. Am. Chem. Soc.* **2014**, *136*, 15607; b) K. Takenaka, S. C. Mohanta, H. Sasai, *Angew. Chem., Int. Ed.* **2014**, *53*, 4675; c) P. Liu, Y. Fukui, P. Tian, Z.-T. He, C.-Y. Sun, N.-Y. Wu, G.-Q. Lin, *J. Am. Chem. Soc.* **2013**, *135*, 11700; d) Z.-T. He, B. Tian, Y. Fukui, X. Tong, P. Tian, G.-Q. Lin, *Angew. Chem., Int. Ed.* **2013**, *52*, 5314.
- [2] K. K. Gollapelli, S. Donikela, N. Manjula, R. Chegondi, *ACS Catal.* **2018**, *8*, 1440.
- [3] Q. Teng, N. Thirupathi, C.-H. Tung, Z. Xu, *Chem. Sci.* **2019**, *10*, 6863.
